# Supplementary material for: Impaired type I interferon signaling activity implicated in the peripheral blood transcriptome of preclinical Alzheimer’s disease
Source: Research Square preprint supplement (doi:10.21203/rs.3.rs-895522/v1), 2021-09-23
Supplement: Supplementary file 1 [file f6df26e751838c7b93aa3826.xlsx]

## Sheet: Table S1
Table S1. Differentially expressed protein-coding genes and isoforms
baseMean	log2FoldChange	lfcSE	stat	pvalue	padj	group	level	ensg	gene_symbol	tx_symbol	biotype
1700	0.39	0.15	2.6	0.01	0.095	AD	gene	ENSG00000002549.12_3	LAP3	LAP3	protein_coding
450	-0.39	0.13	-3	0.0031	0.068	AD	gene	ENSG00000007402.11_4	CACNA2D2	CACNA2D2	protein_coding
130	0.58	0.17	3.4	0.00068	0.048	AD	gene	ENSG00000020577.14_4	SAMD4A	SAMD4A	protein_coding
150	0.44	0.17	2.5	0.012	0.1	AD	gene	ENSG00000035720.8_3	STAP1	STAP1	protein_coding
130	0.45	0.2	2.2	0.026	0.14	AD	gene	ENSG00000038945.15_7	MSR1	MSR1	protein_coding
550	0.49	0.15	3.2	0.0012	0.058	AD	gene	ENSG00000042980.13_3	ADAM28	ADAM28	protein_coding
2700	0.53	0.19	2.8	0.005	0.077	AD	gene	ENSG00000055332.18_7	EIF2AK2	EIF2AK2	protein_coding
420	0.6	0.16	3.6	0.00029	0.04	AD	gene	ENSG00000058091.17_6	CDK14	CDK14	protein_coding
2100	-0.44	0.13	-3.4	0.00064	0.048	AD	gene	ENSG00000059122.16_2	FLYWCH1	FLYWCH1	protein_coding
110	0.4	0.18	2.2	0.026	0.14	AD	gene	ENSG00000075089.9_3	ACTR6	ACTR6	protein_coding
110	0.78	0.26	3	0.003	0.068	AD	gene	ENSG00000078081.8_5	LAMP3	LAMP3	protein_coding
170	0.61	0.21	3	0.0032	0.068	AD	gene	ENSG00000082438.17_8	COBLL1	COBLL1	protein_coding
420	0.51	0.16	3.1	0.0017	0.062	AD	gene	ENSG00000086065.14_3	CHMP5	CHMP5	protein_coding
900	0.8	0.33	2.4	0.014	0.11	AD	gene	ENSG00000088827.12_3	SIGLEC1	SIGLEC1	protein_coding
100	-0.41	0.13	-3.1	0.0021	0.065	AD	gene	ENSG00000088881.20_4	EBF4	EBF4	protein_coding
3700	0.53	0.23	2.3	0.021	0.13	AD	gene	ENSG00000089127.13_6	OAS1	OAS1	protein_coding
100	0.82	0.24	3.4	0.00072	0.048	AD	gene	ENSG00000091972.18_7	CD200	CD200	protein_coding
1100	0.43	0.13	3.3	0.0011	0.056	AD	gene	ENSG00000096968.13_3	JAK2	JAK2	protein_coding
1600	0.63	0.27	2.3	0.02	0.12	AD	gene	ENSG00000100376.12_3	FAM118A	FAM118A	protein_coding
78	0.49	0.2	2.4	0.015	NA	AD	gene	ENSG00000100473.18_5	COCH	COCH	protein_coding
69	-0.49	0.16	-3.2	0.0016	NA	AD	gene	ENSG00000105255.11_5	FSD1	FSD1	protein_coding
300	0.64	0.19	3.4	0.00063	0.048	AD	gene	ENSG00000105967.16_5	TFEC	TFEC	protein_coding
1100	-0.67	0.21	-3.2	0.0015	0.059	AD	gene	ENSG00000107317.13_4	PTGDS	PTGDS	protein_coding
94	0.54	0.19	2.8	0.0052	0.077	AD	gene	ENSG00000108387.15_6	SEPTIN4	SEPTIN4	protein_coding
280	0.46	0.14	3.3	0.0011	0.057	AD	gene	ENSG00000110852.4_4	CLEC2B	CLEC2B	protein_coding
7200	0.68	0.3	2.3	0.024	0.13	AD	gene	ENSG00000111331.13_5	OAS3	OAS3	protein_coding
5200	0.53	0.22	2.4	0.015	0.11	AD	gene	ENSG00000111335.12_4	OAS2	OAS2	protein_coding
280	0.42	0.17	2.4	0.015	0.11	AD	gene	ENSG00000114209.15_5	PDCD10	PDCD10	protein_coding
23	0.43	0.17	2.5	0.013	NA	AD	gene	ENSG00000114405.10_2	C3orf14	C3orf14	protein_coding
990	0.42	0.13	3.3	0.0011	0.056	AD	gene	ENSG00000114450.10_5	GNB4	GNB4	protein_coding
1400	0.46	0.15	3	0.0031	0.068	AD	gene	ENSG00000115267.8_6	IFIH1	IFIH1	protein_coding
770	0.57	0.15	3.8	0.00013	0.031	AD	gene	ENSG00000115355.17_5	CCDC88A	CCDC88A	protein_coding
770	0.53	0.17	3.2	0.0015	0.06	AD	gene	ENSG00000116191.17_6	RALGPS2	RALGPS2	protein_coding
4400	0.39	0.17	2.3	0.022	0.13	AD	gene	ENSG00000117228.10_4	GBP1	GBP1	protein_coding
38	-0.94	0.31	-3.1	0.0023	NA	AD	gene	ENSG00000118785.14_5	SPP1	SPP1	protein_coding
140	0.42	0.17	2.5	0.013	0.11	AD	gene	ENSG00000119013.9_3	NDUFB3	NDUFB3	protein_coding
400	0.4	0.2	2	0.048	0.18	AD	gene	ENSG00000119862.13_5	LGALSL	LGALSL	protein_coding
9900	0.52	0.22	2.4	0.017	0.11	AD	gene	ENSG00000119922.10_5	IFIT2	IFIT2	protein_coding
5600	0.42	0.13	3.2	0.0016	0.06	AD	gene	ENSG00000121858.11_4	TNFSF10	TNFSF10	protein_coding
540	0.43	0.13	3.3	0.001	0.054	AD	gene	ENSG00000122643.21_7	NT5C3A	NT5C3A	protein_coding
590	0.45	0.21	2.1	0.035	0.16	AD	gene	ENSG00000123610.5_3	TNFAIP6	TNFAIP6	protein_coding
34	0.44	0.2	2.2	0.028	NA	AD	gene	ENSG00000124802.12_5	EEF1E1	EEF1E1	protein_coding
2000	-0.39	0.11	-3.4	0.00057	0.048	AD	gene	ENSG00000125534.10_4	PPDPF	PPDPF	protein_coding
320	0.45	0.17	2.7	0.0077	0.088	AD	gene	ENSG00000126821.8_4	SGPP1	SGPP1	protein_coding
1000	0.54	0.19	2.8	0.005	0.077	AD	gene	ENSG00000126860.11_4	EVI2A	EVI2A	protein_coding
140	0.38	0.17	2.3	0.024	0.13	AD	gene	ENSG00000128609.15_4	NDUFA5	NDUFA5	protein_coding
41	0.41	0.18	2.2	0.027	NA	AD	gene	ENSG00000132010.16_5	ZNF20	ZNF20	protein_coding
19	-0.41	0.13	-3.2	0.0012	NA	AD	gene	ENSG00000132016.11_4	C19orf57	C19orf57	protein_coding
4300	0.54	0.2	2.7	0.0065	0.083	AD	gene	ENSG00000132530.17_5	XAF1	XAF1	protein_coding
590	0.79	0.28	2.9	0.0043	0.074	AD	gene	ENSG00000132704.16_4	FCRL2	FCRL2	protein_coding
2500	0.87	0.41	2.1	0.034	0.15	AD	gene	ENSG00000134321.12_3	RSAD2	RSAD2	protein_coding
900	0.67	0.32	2.1	0.036	0.16	AD	gene	ENSG00000134326.11_5	CMPK2	CMPK2	protein_coding
660	0.41	0.18	2.3	0.023	0.13	AD	gene	ENSG00000134755.17_8	DSC2	DSC2	protein_coding
210	0.41	0.15	2.7	0.0071	0.086	AD	gene	ENSG00000136603.14_5	SKIL	SKIL	protein_coding
180	-0.41	0.17	-2.4	0.019	0.12	AD	gene	ENSG00000137094.14_5	DNAJB5	DNAJB5	protein_coding
1300	0.52	0.2	2.5	0.011	0.099	AD	gene	ENSG00000137628.17_5	DDX60	DDX60	protein_coding
1800	0.81	0.39	2.1	0.035	0.16	AD	gene	ENSG00000137959.16_4	IFI44L	IFI44L	protein_coding
890	0.67	0.34	2	0.049	0.18	AD	gene	ENSG00000137965.11_3	IFI44	IFI44	protein_coding
670	0.44	0.14	3.3	0.0011	0.057	AD	gene	ENSG00000138119.17_5	MYOF	MYOF	protein_coding
2000	0.61	0.28	2.2	0.03	0.15	AD	gene	ENSG00000138646.9_4	HERC5	HERC5	protein_coding
920	0.42	0.16	2.6	0.009	0.092	AD	gene	ENSG00000138772.13_5	ANXA3	ANXA3	protein_coding
470	0.42	0.18	2.4	0.018	0.12	AD	gene	ENSG00000139679.15_3	LPAR6	LPAR6	protein_coding
230	-0.52	0.22	-2.3	0.021	0.13	AD	gene	ENSG00000139998.15_6	RAB15	RAB15	protein_coding
420	0.6	0.2	3.1	0.002	0.065	AD	gene	ENSG00000140379.8_4	BCL2A1	BCL2A1	protein_coding
98	0.52	0.16	3.3	0.00092	0.053	AD	gene	ENSG00000141682.11_2	PMAIP1	PMAIP1	protein_coding
210	0.7	0.23	3.1	0.0021	0.065	AD	gene	ENSG00000141753.7_3	IGFBP4	IGFBP4	protein_coding
660	-0.45	0.14	-3.2	0.0016	0.061	AD	gene	ENSG00000142303.14_4	ADAMTS10	ADAMTS10	protein_coding
820	0.69	0.3	2.3	0.022	0.13	AD	gene	ENSG00000143297.19_4	FCRL5	FCRL5	protein_coding
7700	0.56	0.21	2.6	0.0086	0.091	AD	gene	ENSG00000143546.10_4	S100A8	S100A8	protein_coding
60	-0.38	0.12	-3.2	0.0012	NA	AD	gene	ENSG00000144485.11_6	HES6	HES6	protein_coding
34	0.4	0.2	2	0.042	NA	AD	gene	ENSG00000145088.9_4	EAF2	EAF2	protein_coding
890	0.45	0.13	3.6	0.00036	0.044	AD	gene	ENSG00000145416.13_6	MARCHF1	MARCHF1	protein_coding
370	0.4	0.13	3.1	0.0021	0.065	AD	gene	ENSG00000145685.14_6	LHFPL2	LHFPL2	protein_coding
130	0.48	0.17	2.9	0.004	0.072	AD	gene	ENSG00000146757.13_2	ZNF92	ZNF92	protein_coding
640	0.38	0.15	2.6	0.01	0.095	AD	gene	ENSG00000147535.17_7	PLPP5	PLPP5	protein_coding
1400	0.57	0.25	2.3	0.021	0.13	AD	gene	ENSG00000149131.16_5	SERPING1	SERPING1	protein_coding
220	-0.46	0.12	-3.8	0.00016	0.032	AD	gene	ENSG00000149260.18_6	CAPN5	CAPN5	protein_coding
120	-0.69	0.17	-4.1	3.8e-05	0.02	AD	gene	ENSG00000149328.15_3	GLB1L2	GLB1L2	protein_coding
800	-0.46	0.17	-2.7	0.0079	0.088	AD	gene	ENSG00000150687.12_5	PRSS23	PRSS23	protein_coding
180	0.42	0.14	2.9	0.0035	0.07	AD	gene	ENSG00000151490.14_6	PTPRO	PTPRO	protein_coding
170	0.42	0.11	3.9	8e-05	0.025	AD	gene	ENSG00000151743.11_6	AMN1	AMN1	protein_coding
62	0.43	0.15	2.8	0.0054	NA	AD	gene	ENSG00000152422.15_3	XRCC4	XRCC4	protein_coding
4400	0.38	0.14	2.6	0.009	0.092	AD	gene	ENSG00000152558.15_6	TMEM123	TMEM123	protein_coding
340	0.62	0.18	3.4	0.00058	0.048	AD	gene	ENSG00000152689.18_6	RASGRP3	RASGRP3	protein_coding
210	1	0.44	2.3	0.022	0.13	AD	gene	ENSG00000152726.14	FAM21B	FAM21B	protein_coding
140	0.68	0.23	2.9	0.0035	0.07	AD	gene	ENSG00000152766.6_4	ANKRD22	ANKRD22	protein_coding
970	0.41	0.19	2.2	0.03	0.14	AD	gene	ENSG00000152778.9_3	IFIT5	IFIT5	protein_coding
680	0.4	0.17	2.3	0.02	0.12	AD	gene	ENSG00000152926.15_7	ZNF117	ZNF117	protein_coding
22	0.5	0.21	2.4	0.017	NA	AD	gene	ENSG00000153140.8_3	CETN3	CETN3	protein_coding
4200	-0.4	0.14	-3	0.003	0.068	AD	gene	ENSG00000153563.15_4	CD8A	CD8A	protein_coding
140	-0.56	0.14	-4	6e-05	0.021	AD	gene	ENSG00000154134.15_3	ROBO3	ROBO3	protein_coding
97	0.45	0.2	2.3	0.022	0.13	AD	gene	ENSG00000154589.7_3	LY96	LY96	protein_coding
280	0.42	0.14	3.1	0.0018	0.063	AD	gene	ENSG00000155189.12_5	AGPAT5	AGPAT5	protein_coding
110	0.41	0.15	2.8	0.0044	0.074	AD	gene	ENSG00000155329.12_4	ZCCHC10	ZCCHC10	protein_coding
1400	0.39	0.16	2.4	0.017	0.11	AD	gene	ENSG00000155744.9_3	FAM126B	FAM126B	protein_coding
120	-0.44	0.21	-2	0.043	0.17	AD	gene	ENSG00000156510.13_3	HKDC1	HKDC1	protein_coding
310	0.4	0.14	2.9	0.0039	0.071	AD	gene	ENSG00000157483.9_5	MYO1E	MYO1E	protein_coding
7400	0.6	0.27	2.3	0.023	0.13	AD	gene	ENSG00000157601.14_4	MX1	MX1	protein_coding
220	-0.39	0.16	-2.5	0.014	0.11	AD	gene	ENSG00000157985.19_5	AGAP1	AGAP1	protein_coding
62	-0.46	0.2	-2.2	0.024	NA	AD	gene	ENSG00000158747.14_4	NBL1	NBL1	protein_coding
2700	-0.44	0.17	-2.6	0.01	0.096	AD	gene	ENSG00000159674.12_7	SPON2	SPON2	protein_coding
120	-0.78	0.39	-2	0.045	0.17	AD	gene	ENSG00000160307.10_4	S100B	S100B	protein_coding
61	0.51	0.17	3	0.0023	NA	AD	gene	ENSG00000162614.18_4	NEXN	NEXN	protein_coding
94	0.55	0.21	2.6	0.0084	0.09	AD	gene	ENSG00000162772.17_6	ATF3	ATF3	protein_coding
110	0.55	0.18	3	0.0026	0.067	AD	gene	ENSG00000163376.11_3	KBTBD8	KBTBD8	protein_coding
270	0.55	0.17	3.4	0.00081	0.049	AD	gene	ENSG00000163568.15_5	AIM2	AIM2	protein_coding
89	0.43	0.13	3.4	0.00072	0.048	AD	gene	ENSG00000164124.11_4	TMEM144	TMEM144	protein_coding
150	-0.58	0.23	-2.5	0.012	0.1	AD	gene	ENSG00000165548.11_7	TMEM63C	TMEM63C	protein_coding
170	0.92	0.42	2.2	0.028	0.14	AD	gene	ENSG00000165949.12_6	IFI27	IFI27	protein_coding
290	0.4	0.16	2.6	0.01	0.095	AD	gene	ENSG00000166200.15_5	COPS2	COPS2	protein_coding
160	0.46	0.18	2.6	0.0086	0.091	AD	gene	ENSG00000166527.8_3	CLEC4D	CLEC4D	protein_coding
62	-0.45	0.13	-3.5	0.0004	NA	AD	gene	ENSG00000167549.18_5	CORO6	CORO6	protein_coding
140	-0.93	0.28	-3.4	0.00073	0.048	AD	gene	ENSG00000167618.10_5	LAIR2	LAIR2	protein_coding
56	-0.43	0.2	-2.2	0.031	NA	AD	gene	ENSG00000167641.11_4	PPP1R14A	PPP1R14A	protein_coding
440	0.5	0.12	4.1	4.8e-05	0.021	AD	gene	ENSG00000169504.15_4	CLIC4	CLIC4	protein_coding
140	-0.49	0.24	-2.1	0.04	0.16	AD	gene	ENSG00000170298.15_4	LGALS9B	LGALS9B	protein_coding
530	-0.46	0.16	-3	0.0031	0.068	AD	gene	ENSG00000172508.10_3	CARNS1	CARNS1	protein_coding
9500	0.4	0.15	2.7	0.0064	0.083	AD	gene	ENSG00000173193.15_5	PARP14	PARP14	protein_coding
220	0.41	0.13	3.2	0.0012	0.058	AD	gene	ENSG00000173890.17_4	GPR160	GPR160	protein_coding
560	-1.1	0.27	-4	5.2e-05	0.021	AD	gene	ENSG00000176083.17_5	ZNF683	ZNF683	protein_coding
4500	0.46	0.17	2.7	0.0065	0.083	AD	gene	ENSG00000177409.12_5	SAMD9L	SAMD9L	protein_coding
310	0.59	0.27	2.2	0.029	0.14	AD	gene	ENSG00000179750.16_4	APOBEC3B	APOBEC3B	protein_coding
4100	0.42	0.16	2.6	0.01	0.095	AD	gene	ENSG00000181381.13_4	DDX60L	DDX60L	protein_coding
14	-0.61	0.26	-2.4	0.016	NA	AD	gene	ENSG00000182368.4	FAM27A	FAM27A	protein_coding
110	-0.45	0.21	-2.2	0.031	0.15	AD	gene	ENSG00000183691.6_4	NOG	NOG	protein_coding
170	-0.53	0.1	-5.1	3.8e-07	0.0021	AD	gene	ENSG00000184545.11_4	DUSP8	DUSP8	protein_coding
210	0.64	0.28	2.3	0.024	0.13	AD	gene	ENSG00000184979.10_3	USP18	USP18	protein_coding
63	0.56	0.22	2.5	0.011	NA	AD	gene	ENSG00000185897.7_3	FFAR3	FFAR3	protein_coding
580	0.48	0.15	3.2	0.0014	0.059	AD	gene	ENSG00000185947.15_4	ZNF267	ZNF267	protein_coding
190	-0.62	0.27	-2.3	0.023	0.13	AD	gene	ENSG00000186049.8_5	KRT73	KRT73	protein_coding
250	0.49	0.17	2.8	0.0047	0.076	AD	gene	ENSG00000186265.10_4	BTLA	BTLA	protein_coding
120	-0.48	0.14	-3.3	0.00082	0.05	AD	gene	ENSG00000186891.14_5	TNFRSF18	TNFRSF18	protein_coding
500	0.38	0.13	2.9	0.0038	0.071	AD	gene	ENSG00000187164.20_8	SHTN1	SHTN1	protein_coding
87	0.7	0.26	2.7	0.0064	0.083	AD	gene	ENSG00000188290.10_4	HES4	HES4	protein_coding
1800	0.44	0.16	2.7	0.0061	0.081	AD	gene	ENSG00000188313.13_6	PLSCR1	PLSCR1	protein_coding
250	0.55	0.21	2.7	0.0075	0.088	AD	gene	ENSG00000196141.14_6	SPATS2L	SPATS2L	protein_coding
120	-0.71	0.2	-3.5	0.00047	0.045	AD	gene	ENSG00000196169.15_3	KIF19	KIF19	protein_coding
400	0.76	0.23	3.4	0.00078	0.049	AD	gene	ENSG00000196628.18_8	TCF4	TCF4	protein_coding
130	0.41	0.13	3.1	0.0021	0.065	AD	gene	ENSG00000197044.11_3	ZNF441	ZNF441	protein_coding
400	0.39	0.15	2.6	0.011	0.097	AD	gene	ENSG00000197045.13_5	GMFB	GMFB	protein_coding
340	-0.41	0.16	-2.5	0.012	0.1	AD	gene	ENSG00000197077.13_4	KIAA1671	KIAA1671	protein_coding
190	-0.56	0.22	-2.5	0.013	0.1	AD	gene	ENSG00000197262.8	CCL4L2	CCL4L2	protein_coding
43	-0.65	0.24	-2.7	0.0065	NA	AD	gene	ENSG00000197467.15_5	COL13A1	COL13A1	protein_coding
630	0.38	0.16	2.4	0.015	0.11	AD	gene	ENSG00000198019.8	FCGR1B	FCGR1B	protein_coding
330	0.58	0.16	3.6	0.00026	0.039	AD	gene	ENSG00000198825.15_7	INPP5F	INPP5F	protein_coding
350	-0.59	0.22	-2.6	0.0081	0.089	AD	gene	ENSG00000198892.6_2	SHISA4	SHISA4	protein_coding
2300	0.44	0.15	2.8	0.0048	0.077	AD	gene	ENSG00000205413.8_5	SAMD9	SAMD9	protein_coding
410	-0.41	0.14	-3	0.0025	0.067	AD	gene	ENSG00000206561.13_8	COLQ	COLQ	protein_coding
31	-0.64	0.2	-3.2	0.0014	NA	AD	gene	ENSG00000211699.2_3	TRGV3	TRGV3	protein_coding
12	-0.48	0.24	-2	0.047	NA	AD	gene	ENSG00000211720.3_4	TRBV11-1	TRBV11-1	protein_coding
78	-0.69	0.23	-3	0.003	NA	AD	gene	ENSG00000211745.3_3	TRBV4-2	TRBV4-2	protein_coding
66	-0.51	0.24	-2.2	0.03	NA	AD	gene	ENSG00000211750.2_4	TRBV24-1	TRBV24-1	protein_coding
130	-0.43	0.16	-2.6	0.0085	0.091	AD	gene	ENSG00000211752.3_2	TRBV27	TRBV27	protein_coding
90	-0.7	0.17	-4.1	4.9e-05	0.021	AD	gene	ENSG00000211794.3_2	TRAV12-3	TRAV12-3	protein_coding
28	-0.39	0.16	-2.5	0.012	NA	AD	gene	ENSG00000211802.3_2	TRAV22	TRAV22	protein_coding
36	-0.64	0.27	-2.4	0.017	NA	AD	gene	ENSG00000211804.3_3	TRDV1	TRDV1	protein_coding
27	-0.55	0.18	-3	0.0023	NA	AD	gene	ENSG00000211806.2_2	TRAV25	TRAV25	protein_coding
69	-0.47	0.14	-3.3	0.00082	NA	AD	gene	ENSG00000211810.3_2	TRAV29DV5	TRAV29DV5	protein_coding
4.1	-0.63	0.3	-2.1	0.036	NA	AD	gene	ENSG00000211813.2_3	TRAV34	TRAV34	protein_coding
42	-0.52	0.18	-2.9	0.0042	NA	AD	gene	ENSG00000211817.2_2	TRAV38-2DV8	TRAV38-2DV8	protein_coding
35	0.9	0.31	2.9	0.0039	NA	AD	gene	ENSG00000211967.3_4	IGHV3-53	IGHV3-53	protein_coding
8.6	0.62	0.28	2.2	0.029	NA	AD	gene	ENSG00000211968.3_6	IGHV1-58	IGHV1-58	protein_coding
690	-0.5	0.15	-3.3	0.001	0.054	AD	gene	ENSG00000213366.13_4	GSTM2	GSTM2	protein_coding
630	-2.5	0.84	-2.9	0.0033	0.068	AD	gene	ENSG00000213934.8_5	HBG1	HBG1	protein_coding
140	0.41	0.18	2.3	0.024	0.13	AD	gene	ENSG00000215126.6	CBWD7	CBWD7	protein_coding
83	-0.39	0.13	-3	0.0029	0.068	AD	gene	ENSG00000221946.7_3	FXYD7	FXYD7	protein_coding
1300	-0.41	0.15	-2.6	0.0086	0.091	AD	gene	ENSG00000227191.8_4	TRGC2	TRGC2	protein_coding
42	-0.46	0.22	-2.1	0.035	NA	AD	gene	ENSG00000230099.2_5	TRBV5-4	TRBV5-4	protein_coding
50	-0.41	0.12	-3.3	0.001	NA	AD	gene	ENSG00000233493.4_4	TMEM238	TMEM238	protein_coding
420	-0.54	0.25	-2.2	0.029	0.14	AD	gene	ENSG00000238243.3_3	OR2W3	OR2W3	protein_coding
130	-0.52	0.26	-2	0.046	0.18	AD	gene	ENSG00000240505.9_4	TNFRSF13B	TNFRSF13B	protein_coding
630	0.92	0.31	3	0.0029	0.068	AD	gene	ENSG00000241351.3_4	IGKV3-11	IGKV3-11	protein_coding
630	0.48	0.16	3	0.0031	0.068	AD	gene	ENSG00000242616.4_4	GNG10	GNG10	protein_coding
150	0.42	0.17	2.5	0.013	0.11	AD	gene	ENSG00000244115.1_3	DNAJC25-GNG10	DNAJC25-GNG10	protein_coding
98	-0.56	0.28	-2	0.043	0.17	AD	gene	ENSG00000249992.2_3	TMEM158	TMEM158	protein_coding
28	-0.58	0.25	-2.4	0.018	NA	AD	gene	ENSG00000254126.8_7	CD8B2	CD8B2	protein_coding
9.7	-1	0.28	-3.6	0.00028	NA	AD	gene	ENSG00000259092.1_3	TRAV30	TRAV30	protein_coding
410	0.55	0.15	3.7	0.00023	0.038	AD	gene	ENSG00000265118.5_7	AC134669.1	AC134669.1	protein_coding
27	-0.39	0.18	-2.2	0.029	NA	AD	gene	ENSG00000269403.1_7	AC008750.8	AC008750.8	protein_coding
32	-1.3	0.43	-3.1	0.0018	NA	AD	gene	ENSG00000276566.1_2	IGKV1D-13	IGKV1D-13	protein_coding
23	-0.74	0.32	-2.3	0.019	NA	AD	gene	ENSG00000278558.5_6	TMEM191B	TMEM191B	protein_coding
1600	0.39	0.16	2.5	0.013	0.14	AD	iso	ENST00000606142.5_2	LAP3	LAP3-210	protein_coding
83	0.67	0.28	2.4	0.019	NA	AD	iso	ENST00000618908.4_1	LAP3	LAP3-211	protein_coding
170	-0.63	0.24	-2.7	0.0075	NA	AD	iso	ENST00000512744.5_3	PLXND1	PLXND1-214	protein_coding
28	-0.55	0.13	-4.1	3.4e-05	NA	AD	iso	ENST00000580226.5_2	OSBPL7	OSBPL7-206	protein_coding
320	0.48	0.24	2	0.049	0.23	AD	iso	ENST00000307305.12_1	PHTF2	PHTF2-203	protein_coding
130	0.49	0.18	2.8	0.0058	NA	AD	iso	ENST00000489994.5_1	IFRD1	IFRD1-215	protein_coding
3.9	-0.62	0.29	-2.1	0.035	NA	AD	iso	ENST00000595379.1_3	PAF1	PAF1-203	protein_coding
46	0.44	0.19	2.4	0.018	NA	AD	iso	ENST00000479362.1_4	CDK11A	CDK11A-216	protein_coding
180	-0.68	0.3	-2.3	0.024	NA	AD	iso	ENST00000341426.9_3	NADK	NADK-201	protein_coding
23	-0.98	0.5	-2	0.048	NA	AD	iso	ENST00000460770.1_2	SYPL1	SYPL1-203	protein_coding
23	-0.57	0.24	-2.4	0.018	NA	AD	iso	ENST00000440815.7_3	IL32	IL32-206	protein_coding
330	0.39	0.17	2.3	0.022	0.17	AD	iso	ENST00000522948.5_1	RHOBTB2	RHOBTB2-206	protein_coding
760	0.38	0.12	3.2	0.0012	0.087	AD	iso	ENST00000337002.9_2	SEC62	SEC62-201	protein_coding
140	0.53	0.23	2.3	0.023	NA	AD	iso	ENST00000530886.5_2	CSDE1	CSDE1-214	protein_coding
13	-0.61	0.3	-2	0.041	NA	AD	iso	ENST00000527111.2_2	FUZ	FUZ-208	protein_coding
38	0.52	0.23	2.2	0.025	NA	AD	iso	ENST00000613136.1_1	CD22	CD22-234	protein_coding
260	-0.39	0.19	-2	0.042	NA	AD	iso	ENST00000537904.6_4	SLC25A39	SLC25A39-203	protein_coding
360	-0.41	0.18	-2.2	0.026	0.18	AD	iso	ENST00000588049.5_2	SLC25A39	SLC25A39-209	protein_coding
170	0.39	0.15	2.6	0.0099	NA	AD	iso	ENST00000394805.8_2	MATR3	MATR3-201	protein_coding
740	0.58	0.22	2.6	0.0095	0.13	AD	iso	ENST00000502499.5_1	MATR3	MATR3-203	protein_coding
580	0.39	0.14	2.9	0.0038	0.11	AD	iso	ENST00000435644.6_3	RB1CC1	RB1CC1-202	protein_coding
6.5	-0.67	0.3	-2.3	0.024	NA	AD	iso	ENST00000459884.1_1	ALAS1	ALAS1-203	protein_coding
560	0.49	0.18	2.7	0.0066	0.12	AD	iso	ENST00000526421.6_2	BIRC3	BIRC3-202	protein_coding
210	0.38	0.15	2.5	0.012	NA	AD	iso	ENST00000527309.2_2	BIRC3	BIRC3-203	protein_coding
180	0.38	0.17	2.2	0.03	NA	AD	iso	ENST00000652237.1_2	TYMP	TYMP-215	protein_coding
270	0.45	0.16	2.8	0.0045	NA	AD	iso	ENST00000352159.8_1	FAS	FAS-202	protein_coding
360	0.39	0.13	2.9	0.004	0.11	AD	iso	ENST00000640681.1_1	FAS	FAS-220	protein_coding
1000	0.55	0.17	3.3	0.0011	0.087	AD	iso	ENST00000645753.1_3	IFNGR1	IFNGR1-209	protein_coding
11	-0.46	0.22	-2	0.04	NA	AD	iso	ENST00000505468.1_1	B4GALT7	B4GALT7-205	protein_coding
110	0.46	0.15	3.1	0.002	NA	AD	iso	ENST00000528894.8_2	POU2F2	POU2F2-206	protein_coding
55	0.54	0.2	2.7	0.0061	NA	AD	iso	ENST00000477527.1_1	TBPL1	TBPL1-206	protein_coding
850	0.42	0.16	2.6	0.011	0.14	AD	iso	ENST00000527536.5_5	BCLAF1	BCLAF1-205	protein_coding
240	-0.57	0.2	-2.8	0.0048	NA	AD	iso	ENST00000495645.5_2	CHPF2	CHPF2-204	protein_coding
23	0.48	0.16	2.9	0.0034	NA	AD	iso	ENST00000521972.1_2	NSMAF	NSMAF-212	protein_coding
36	0.84	0.19	4.4	1.3e-05	NA	AD	iso	ENST00000523177.5_2	NSMAF	NSMAF-215	protein_coding
130	0.57	0.19	3.1	0.0022	NA	AD	iso	ENST00000265404.7_2	STAP1	STAP1-201	protein_coding
15	-0.81	0.36	-2.3	0.023	NA	AD	iso	ENST00000575033.1_1	EDC4	EDC4-209	protein_coding
6600	0.43	0.13	3.3	0.0011	0.087	AD	iso	ENST00000343200.9_3	VCAN	VCAN-203	protein_coding
12	-0.48	0.21	-2.3	0.022	NA	AD	iso	ENST00000482694.1_2	RETSAT	RETSAT-206	protein_coding
250	0.58	0.17	3.5	0.00055	NA	AD	iso	ENST00000265769.9_2	ADAM28	ADAM28-201	protein_coding
58	0.51	0.19	2.7	0.0069	NA	AD	iso	ENST00000437154.6_1	ADAM28	ADAM28-202	protein_coding
36	0.45	0.19	2.3	0.019	NA	AD	iso	ENST00000518326.1_1	ADAM28	ADAM28-203	protein_coding
62	0.64	0.2	3.2	0.0015	NA	AD	iso	ENST00000523236.5_1	ADAM28	ADAM28-210	protein_coding
42	-0.4	0.19	-2.2	0.031	NA	AD	iso	ENST00000544272.1_2	USP28	USP28-211	protein_coding
670	0.48	0.17	2.8	0.0058	0.12	AD	iso	ENST00000264183.9_4	ARID4B	ARID4B-201	protein_coding
190	-0.76	0.37	-2	0.041	NA	AD	iso	ENST00000519663.5_1	CYFIP2	CYFIP2-205	protein_coding
2600	0.55	0.19	2.9	0.0038	0.11	AD	iso	ENST00000233057.9_3	EIF2AK2	EIF2AK2-201	protein_coding
48	0.76	0.34	2.3	0.023	NA	AD	iso	ENST00000447751.5_4	GDI2	GDI2-205	protein_coding
60	-0.7	0.33	-2.1	0.032	NA	AD	iso	ENST00000546762.5_4	PPP1R12A	PPP1R12A-205	protein_coding
500	-0.41	0.1	-3.9	9.6e-05	0.066	AD	iso	ENST00000253928.13_1	FLYWCH1	FLYWCH1-201	protein_coding
790	-0.46	0.16	-2.9	0.0038	0.11	AD	iso	ENST00000570752.5_1	FLYWCH1	FLYWCH1-205	protein_coding
410	-0.55	0.16	-3.4	0.00057	0.077	AD	iso	ENST00000574985.1_1	FLYWCH1	FLYWCH1-212	protein_coding
240	0.39	0.13	3	0.0027	NA	AD	iso	ENST00000486749.5_2	SLC2A3	SLC2A3-205	protein_coding
34	0.44	0.18	2.5	0.014	NA	AD	iso	ENST00000309096.4_1	GPBP1	GPBP1-202	protein_coding
250	0.42	0.13	3.2	0.0012	NA	AD	iso	ENST00000511209.5_1	GPBP1	GPBP1-205	protein_coding
480	0.43	0.21	2	0.047	0.23	AD	iso	ENST00000514387.6_1	GPBP1	GPBP1-208	protein_coding
29	-0.41	0.19	-2.2	0.029	NA	AD	iso	ENST00000339046.8_1	TSPAN32	TSPAN32-202	protein_coding
9.9	-0.62	0.22	-2.8	0.0047	NA	AD	iso	ENST00000543118.1_1	RFXANK	RFXANK-211	protein_coding
30	-0.56	0.12	-4.7	2.6e-06	NA	AD	iso	ENST00000597095.5_2	SUGP2	SUGP2-207	protein_coding
76	0.59	0.29	2	0.042	NA	AD	iso	ENST00000441310.6_3	PMS1	PMS1-213	protein_coding
35	-0.38	0.14	-2.7	0.0069	NA	AD	iso	ENST00000369441.7_1	WDR3	WDR3-202	protein_coding
1200	0.39	0.14	2.7	0.0073	0.12	AD	iso	ENST00000370521.8_2	PKN2	PKN2-203	protein_coding
6.1	-1.3	0.49	-2.7	0.0065	NA	AD	iso	ENST00000550957.1_1	DGKA	DGKA-228	protein_coding
110	-0.52	0.25	-2.1	0.035	NA	AD	iso	ENST00000564578.5_2	KARS1	KARS1-204	protein_coding
220	0.46	0.11	4.2	2.3e-05	NA	AD	iso	ENST00000264052.9_1	SP100	SP100-201	protein_coding
76	-0.42	0.2	-2.1	0.035	NA	AD	iso	ENST00000357043.6_3	RASSF1	RASSF1-202	protein_coding
150	-0.64	0.23	-2.8	0.005	NA	AD	iso	ENST00000395117.6_2	RASSF1	RASSF1-204	protein_coding
15	0.6	0.29	2.1	0.039	NA	AD	iso	ENST00000483117.1_2	LAPTM4A	LAPTM4A-202	protein_coding
1700	-0.41	0.099	-4.2	2.7e-05	0.032	AD	iso	ENST00000394432.8_3	RASGRP2	RASGRP2-211	protein_coding
100	0.64	0.32	2	0.043	NA	AD	iso	ENST00000474300.1_1	BCL3	BCL3-207	protein_coding
24	0.43	0.22	2	0.048	NA	AD	iso	ENST00000518925.5_1	POLB	POLB-204	protein_coding
72	-0.39	0.15	-2.6	0.0093	NA	AD	iso	ENST00000336761.10_1	DAZAP1	DAZAP1-202	protein_coding
22	-0.39	0.17	-2.4	0.018	NA	AD	iso	ENST00000592164.1_4	ADGRL1	ADGRL1-207	protein_coding
12	-0.55	0.27	-2	0.044	NA	AD	iso	ENST00000487401.1_2	SREBF1	SREBF1-215	protein_coding
61	1.2	0.37	3.2	0.0013	NA	AD	iso	ENST00000473824.1_1	UBE2D1	UBE2D1-202	protein_coding
330	0.41	0.15	2.7	0.0072	0.12	AD	iso	ENST00000236937.13_1	FCGR2B	FCGR2B-201	protein_coding
92	0.49	0.16	3	0.0025	NA	AD	iso	ENST00000358671.9_1	FCGR2B	FCGR2B-202	protein_coding
15	0.5	0.17	3	0.0028	NA	AD	iso	ENST00000512847.1_1	ALPK1	ALPK1-215	protein_coding
120	-0.42	0.2	-2.1	0.04	NA	AD	iso	ENST00000167462.9_2	LLGL2	LLGL2-201	protein_coding
6	-0.66	0.33	-2	0.048	NA	AD	iso	ENST00000468820.1_2	GSDMB	GSDMB-207	protein_coding
18	-0.94	0.36	-2.6	0.0092	NA	AD	iso	ENST00000426649.5_1	BCS1L	BCS1L-207	protein_coding
15	-0.74	0.28	-2.7	0.0077	NA	AD	iso	ENST00000464611.1_3	ACTB	ACTB-207	protein_coding
86	0.39	0.12	3.2	0.0014	NA	AD	iso	ENST00000545678.1_1	RBM7	RBM7-208	protein_coding
94	-0.39	0.13	-3	0.0026	NA	AD	iso	ENST00000593609.1_1	ARHGEF1	ARHGEF1-205	protein_coding
580	0.42	0.18	2.3	0.023	0.18	AD	iso	ENST00000264331.8_3	TOP2B	TOP2B-201	protein_coding
12	0.48	0.18	2.6	0.0085	NA	AD	iso	ENST00000533928.1_2	USP33	USP33-218	protein_coding
110	0.39	0.16	2.4	0.017	NA	AD	iso	ENST00000358780.10_4	FAM76B	FAM76B-201	protein_coding
250	0.84	0.39	2.1	0.033	NA	AD	iso	ENST00000334743.9_2	PPP2R5C	PPP2R5C-202	protein_coding
110	0.6	0.18	3.3	0.0011	NA	AD	iso	ENST00000343805.10_1	SP140	SP140-201	protein_coding
15	0.39	0.19	2.1	0.038	NA	AD	iso	ENST00000465051.1_2	CEACAM1	CEACAM1-209	protein_coding
18	-0.43	0.17	-2.5	0.013	NA	AD	iso	ENST00000602000.1_2	LIPE	LIPE-209	protein_coding
98	0.43	0.17	2.6	0.01	NA	AD	iso	ENST00000448348.3_2	STX7	STX7-203	protein_coding
410	0.58	0.26	2.2	0.027	0.18	AD	iso	ENST00000612242.4_3	RSBN1	RSBN1-204	protein_coding
340	0.54	0.14	3.7	0.00019	0.069	AD	iso	ENST00000636998.1_6	MEF2C	MEF2C-244	protein_coding
570	0.54	0.26	2.1	0.04	0.22	AD	iso	ENST00000367367.8_1	PTPRC	PTPRC-203	protein_coding
110	0.39	0.18	2.1	0.035	NA	AD	iso	ENST00000540806.7_3	ZNF506	ZNF506-203	protein_coding
6200	0.38	0.13	2.9	0.0033	0.1	AD	iso	ENST00000512982.4_4	FYB1	FYB1-208	protein_coding
49	0.57	0.26	2.2	0.027	NA	AD	iso	ENST00000647313.1_2	FYB1	FYB1-214	protein_coding
250	0.54	0.27	2	0.042	NA	AD	iso	ENST00000640965.1_1	ME2	ME2-218	protein_coding
220	0.49	0.15	3.4	0.00077	NA	AD	iso	ENST00000542652.6_2	EPB41L3	EPB41L3-205	protein_coding
9.8	0.59	0.22	2.7	0.0061	NA	AD	iso	ENST00000568744.1_1	CYLD	CYLD-213	protein_coding
63	-0.42	0.14	-2.9	0.0034	NA	AD	iso	ENST00000391694.4_1	ZNF446	ZNF446-202	protein_coding
330	0.38	0.14	2.7	0.007	0.12	AD	iso	ENST00000263780.9_2	CHMP2B	CHMP2B-201	protein_coding
97	0.43	0.18	2.5	0.013	NA	AD	iso	ENST00000435168.6_3	SMAP2	SMAP2-203	protein_coding
320	0.66	0.22	3	0.0029	0.1	AD	iso	ENST00000541929.5_2	HAL	HAL-203	protein_coding
20	0.39	0.19	2	0.045	NA	AD	iso	ENST00000512561.5_2	AK6	AK6-204	protein_coding
97	0.4	0.17	2.4	0.017	NA	AD	iso	ENST00000356716.8_1	MYNN	MYNN-202	protein_coding
110	0.52	0.2	2.5	0.011	NA	AD	iso	ENST00000320280.8_1	SCAMP1	SCAMP1-201	protein_coding
22	-0.74	0.25	-3	0.0031	NA	AD	iso	ENST00000475929.5_2	ABCB1	ABCB1-203	protein_coding
14	0.68	0.28	2.4	0.015	NA	AD	iso	ENST00000506797.5_1	MGST2	MGST2-204	protein_coding
380	0.54	0.18	3.1	0.0022	0.098	AD	iso	ENST00000223500.9_2	CHMP5	CHMP5-201	protein_coding
100	0.5	0.23	2.2	0.03	NA	AD	iso	ENST00000396376.5_1	SNX10	SNX10-202	protein_coding
13	-2.7	0.98	-2.8	0.0059	NA	AD	iso	ENST00000450882.1_2	MRPL28	MRPL28-206	protein_coding
20	0.6	0.29	2.1	0.038	NA	AD	iso	ENST00000490586.1_1	LAT2	LAT2-210	protein_coding
12	-0.47	0.2	-2.4	0.018	NA	AD	iso	ENST00000584880.5_1	PSMC5	PSMC5-219	protein_coding
17	0.46	0.18	2.5	0.012	NA	AD	iso	ENST00000483387.1_1	GNAS	GNAS-242	protein_coding
110	0.44	0.18	2.4	0.016	NA	AD	iso	ENST00000378863.9_3	CRLS1	CRLS1-201	protein_coding
730	0.84	0.32	2.6	0.0095	0.13	AD	iso	ENST00000344754.5_2	SIGLEC1	SIGLEC1-201	protein_coding
160	-0.41	0.11	-3.7	0.00025	NA	AD	iso	ENST00000539079.5_2	ANAPC5	ANAPC5-214	protein_coding
2100	0.73	0.26	2.8	0.0048	0.11	AD	iso	ENST00000202917.10_2	OAS1	OAS1-201	protein_coding
38	-0.6	0.2	-2.9	0.0032	NA	AD	iso	ENST00000549815.1_2	GCN1	GCN1-206	protein_coding
110	0.57	0.26	2.2	0.027	NA	AD	iso	ENST00000423823.6_1	ZNF302	ZNF302-201	protein_coding
14	-0.42	0.21	-2	0.048	NA	AD	iso	ENST00000541049.1_1	LAG3	LAG3-204	protein_coding
350	-0.47	0.15	-3.2	0.0015	0.089	AD	iso	ENST00000243562.13_3	LTBP4	LTBP4-202	protein_coding
13	-1.7	0.53	-3.3	0.0011	NA	AD	iso	ENST00000593463.5_3	LTBP4	LTBP4-207	protein_coding
3.8	-1.2	0.49	-2.4	0.015	NA	AD	iso	ENST00000597151.1_1	LTBP4	LTBP4-217	protein_coding
32	-0.53	0.23	-2.3	0.023	NA	AD	iso	ENST00000527718.1_3	PABPC4	PABPC4-222	protein_coding
11	-0.43	0.22	-2	0.044	NA	AD	iso	ENST00000558302.1_1	CERS4	CERS4-204	protein_coding
820	0.48	0.22	2.2	0.028	0.19	AD	iso	ENST00000393249.6_3	OSBPL8	OSBPL8-202	protein_coding
38	1	0.26	4	7.2e-05	NA	AD	iso	ENST00000470718.5_1	PSME1	PSME1-203	protein_coding
480	0.39	0.096	4.1	4e-05	0.042	AD	iso	ENST00000261475.9_2	PPP2R3C	PPP2R3C-201	protein_coding
18	0.55	0.26	2.2	0.031	NA	AD	iso	ENST00000466532.1_1	COL9A3	COL9A3-205	protein_coding
47	0.41	0.2	2	0.042	NA	AD	iso	ENST00000472880.1_1	COL9A3	COL9A3-209	protein_coding
89	0.68	0.21	3.3	0.00098	NA	AD	iso	ENST00000549392.5_2	MYL6	MYL6-214	protein_coding
63	-1.3	0.49	-2.7	0.0071	NA	AD	iso	ENST00000549450.6_3	AAAS	AAAS-213	protein_coding
80	0.91	0.39	2.4	0.018	NA	AD	iso	ENST00000491200.5_1	HNRNPH3	HNRNPH3-211	protein_coding
1100	0.45	0.14	3.2	0.0013	0.087	AD	iso	ENST00000381652.3_1	JAK2	JAK2-201	protein_coding
18	-0.44	0.21	-2.1	0.035	NA	AD	iso	ENST00000600395.5_1	TECR	TECR-221	protein_coding
100	-0.38	0.11	-3.4	0.00057	NA	AD	iso	ENST00000463909.1_2	LZTR1	LZTR1-208	protein_coding
120	0.43	0.16	2.7	0.0068	NA	AD	iso	ENST00000619906.4_1	GRK3	GRK3-203	protein_coding
17	-0.5	0.14	-3.6	0.00031	NA	AD	iso	ENST00000459646.1_1	SH3BP1	SH3BP1-202	protein_coding
130	0.49	0.18	2.8	0.005	NA	AD	iso	ENST00000451060.6_2	POLDIP3	POLDIP3-205	protein_coding
280	0.38	0.14	2.7	0.0067	0.12	AD	iso	ENST00000397279.8_1	APOL1	APOL1-203	protein_coding
180	1.3	0.5	2.6	0.01	NA	AD	iso	ENST00000405673.5_1	FAM118A	FAM118A-202	protein_coding
1100	0.42	0.21	2	0.044	0.22	AD	iso	ENST00000441876.7_2	FAM118A	FAM118A-205	protein_coding
27	1.2	0.52	2.3	0.021	NA	AD	iso	ENST00000476754.1_1	FAM118A	FAM118A-210	protein_coding
57	1	0.44	2.4	0.017	NA	AD	iso	ENST00000483102.5_1	FAM118A	FAM118A-214	protein_coding
15	0.42	0.17	2.5	0.013	NA	AD	iso	ENST00000476110.1_1	RBX1	RBX1-203	protein_coding
15	-0.47	0.12	-4	6.5e-05	NA	AD	iso	ENST00000479648.1_1	TRMU	TRMU-211	protein_coding
40	-0.42	0.16	-2.6	0.0089	NA	AD	iso	ENST00000553546.1_2	SDR39U1	SDR39U1-205	protein_coding
60	-0.63	0.25	-2.5	0.014	NA	AD	iso	ENST00000415355.7_4	GZMB	GZMB-204	protein_coding
47	-0.4	0.2	-2	0.047	NA	AD	iso	ENST00000526004.1_2	GZMB	GZMB-205	protein_coding
43	0.63	0.28	2.2	0.025	NA	AD	iso	ENST00000395573.8_2	CNIH1	CNIH1-202	protein_coding
170	0.61	0.18	3.5	0.00054	NA	AD	iso	ENST00000554684.5_3	PPP4R3A	PPP4R3A-205	protein_coding
270	-1.4	0.6	-2.4	0.018	NA	AD	iso	ENST00000338631.10_3	ACIN1	ACIN1-202	protein_coding
16	1.3	0.6	2.2	0.029	NA	AD	iso	ENST00000528895.5_8	TM9SF1	TM9SF1-207	protein_coding
290	0.53	0.19	2.8	0.0056	0.12	AD	iso	ENST00000307712.11_3	SEC23A	SEC23A-201	protein_coding
8.7	-0.89	0.45	-2	0.05	NA	AD	iso	ENST00000556092.5_2	SEC23A	SEC23A-212	protein_coding
14	-0.87	0.32	-2.7	0.0074	NA	AD	iso	ENST00000644197.1_2	GSS	GSS-213	protein_coding
16	-0.54	0.19	-2.9	0.0041	NA	AD	iso	ENST00000522959.5_1	ARFGAP1	ARFGAP1-216	protein_coding
58	-0.51	0.17	-2.9	0.0037	NA	AD	iso	ENST00000607873.1_3	ARFRP1	ARFRP1-202	protein_coding
440	0.41	0.14	3	0.0025	0.098	AD	iso	ENST00000379070.3_1	CDS2	CDS2-201	protein_coding
520	0.58	0.19	3.1	0.0022	0.098	AD	iso	ENST00000647163.1_2	SAMHD1	SAMHD1-226	protein_coding
110	-0.53	0.15	-3.5	0.00042	NA	AD	iso	ENST00000415272.2_3	NOP56	NOP56-202	protein_coding
60	-0.46	0.18	-2.6	0.0081	NA	AD	iso	ENST00000480992.5_1	NOP56	NOP56-213	protein_coding
23	-0.39	0.19	-2.1	0.038	NA	AD	iso	ENST00000477689.2_3	IDH3B	IDH3B-207	protein_coding
6200	0.43	0.16	2.7	0.0065	0.12	AD	iso	ENST00000320876.10_2	SMCHD1	SMCHD1-201	protein_coding
1300	0.42	0.15	2.7	0.0062	0.12	AD	iso	ENST00000375887.8_1	TNFSF13B	TNFSF13B-201	protein_coding
88	0.53	0.17	3.2	0.0016	NA	AD	iso	ENST00000430559.5_1	TNFSF13B	TNFSF13B-202	protein_coding
42	0.55	0.21	2.6	0.0086	NA	AD	iso	ENST00000479435.1_1	TNFSF13B	TNFSF13B-203	protein_coding
22	-0.59	0.19	-3.1	0.0022	NA	AD	iso	ENST00000569968.1_2	WDR59	WDR59-221	protein_coding
82	-0.74	0.37	-2	0.043	NA	AD	iso	ENST00000621703.4_2	NPRL3	NPRL3-213	protein_coding
810	-0.41	0.11	-3.8	0.00017	0.069	AD	iso	ENST00000564774.5_2	TAF1C	TAF1C-212	protein_coding
27	-0.65	0.18	-3.6	0.0003	NA	AD	iso	ENST00000561707.1_2	COTL1	COTL1-202	protein_coding
990	0.52	0.2	2.6	0.0083	0.13	AD	iso	ENST00000540269.6_1	USP10	USP10-202	protein_coding
210	-0.38	0.15	-2.5	0.012	NA	AD	iso	ENST00000565092.6_2	CLCN7	CLCN7-209	protein_coding
36	-0.46	0.18	-2.6	0.0095	NA	AD	iso	ENST00000495568.7_2	PIEZO1	PIEZO1-211	protein_coding
100	0.4	0.15	2.7	0.0077	NA	AD	iso	ENST00000567201.5_2	GGA2	GGA2-209	protein_coding
24	0.48	0.19	2.5	0.012	NA	AD	iso	ENST00000567041.1_5	ZNF106	ZNF106-208	protein_coding
39	0.41	0.21	2	0.049	NA	AD	iso	ENST00000558653.5_1	DTWD1	DTWD1-205	protein_coding
660	0.43	0.16	2.6	0.0096	0.13	AD	iso	ENST00000251076.9_2	DMXL2	DMXL2-201	protein_coding
32	0.44	0.17	2.5	0.011	NA	AD	iso	ENST00000517784.5_1	EMC2	EMC2-203	protein_coding
32	0.4	0.17	2.4	0.016	NA	AD	iso	ENST00000520294.5_1	EMC2	EMC2-206	protein_coding
22	-0.8	0.4	-2	0.046	NA	AD	iso	ENST00000528721.5_2	ARMC1	ARMC1-206	protein_coding
78	-0.57	0.27	-2.1	0.038	NA	AD	iso	ENST00000518192.5_1	LEPROTL1	LEPROTL1-204	protein_coding
750	0.65	0.29	2.3	0.023	0.18	AD	iso	ENST00000518611.5_2	BNIP3L	BNIP3L-202	protein_coding
140	-0.43	0.16	-2.7	0.0069	NA	AD	iso	ENST00000221363.8_3	MAN2B1	MAN2B1-201	protein_coding
160	0.53	0.24	2.2	0.027	NA	AD	iso	ENST00000615047.4_2	KCNN4	KCNN4-208	protein_coding
20	-0.49	0.16	-3.1	0.0021	NA	AD	iso	ENST00000587019.5_1	CCDC130	CCDC130-206	protein_coding
18	-0.8	0.29	-2.8	0.0054	NA	AD	iso	ENST00000587083.1_2	TLE5	TLE5-208	protein_coding
55	-0.39	0.19	-2.1	0.035	NA	AD	iso	ENST00000477255.1_1	LILRA1	LILRA1-204	protein_coding
17	-0.41	0.17	-2.5	0.014	NA	AD	iso	ENST00000608577.1_2	RASAL3	RASAL3-206	protein_coding
16	-0.47	0.17	-2.7	0.0062	NA	AD	iso	ENST00000525880.5_2	ILVBL	ILVBL-203	protein_coding
50	-0.44	0.21	-2.1	0.038	NA	AD	iso	ENST00000586392.1_1	GPI	GPI-204	protein_coding
88	-1.6	0.68	-2.4	0.016	NA	AD	iso	ENST00000602155.5_2	PRKD2	PRKD2-217	protein_coding
180	-3.3	0.98	-3.4	0.00061	NA	AD	iso	ENST00000262585.6_4	DENND3	DENND3-201	protein_coding
25	-0.43	0.2	-2.2	0.03	NA	AD	iso	ENST00000600467.6_4	RPS19	RPS19-207	protein_coding
44	-0.42	0.17	-2.4	0.016	NA	AD	iso	ENST00000593572.5_2	NKG7	NKG7-202	protein_coding
16	-0.5	0.18	-2.8	0.0058	NA	AD	iso	ENST00000589625.5_5	CDC37	CDC37-205	protein_coding
23	-0.53	0.17	-3	0.0026	NA	AD	iso	ENST00000600292.5_2	RABAC1	RABAC1-206	protein_coding
12	-0.97	0.46	-2.1	0.034	NA	AD	iso	ENST00000599322.5_2	LIG1	LIG1-218	protein_coding
13	-0.49	0.23	-2.1	0.035	NA	AD	iso	ENST00000583534.1_3	ISYNA1	ISYNA1-213	protein_coding
55	-0.41	0.12	-3.4	0.0007	NA	AD	iso	ENST00000558276.7_2	PBX4	PBX4-204	protein_coding
31	-0.51	0.2	-2.6	0.0099	NA	AD	iso	ENST00000594342.5_2	ETHE1	ETHE1-202	protein_coding
21	-0.68	0.34	-2	0.045	NA	AD	iso	ENST00000470500.1_1	AVL9	AVL9-206	protein_coding
7.7	0.5	0.22	2.3	0.024	NA	AD	iso	ENST00000467730.1_2	NAMPT	NAMPT-208	protein_coding
150	0.45	0.17	2.6	0.0083	NA	AD	iso	ENST00000464606.5_2	ZC3HAV1	ZC3HAV1-203	protein_coding
210	0.59	0.22	2.7	0.007	NA	AD	iso	ENST00000265440.12_5	TFEC	TFEC-201	protein_coding
150	0.43	0.21	2	0.041	NA	AD	iso	ENST00000223122.4_2	C1GALT1	C1GALT1-201	protein_coding
170	0.55	0.18	3.1	0.0019	NA	AD	iso	ENST00000418337.6_4	PRKAG2	PRKAG2-203	protein_coding
15	0.58	0.28	2.1	0.038	NA	AD	iso	ENST00000493592.1_2	BCL7B	BCL7B-212	protein_coding
19	0.39	0.19	2.1	0.038	NA	AD	iso	ENST00000490347.5_5	TLE4	TLE4-224	protein_coding
370	-0.74	0.21	-3.6	0.00032	0.074	AD	iso	ENST00000336395.6_2	TESK1	TESK1-201	protein_coding
380	0.57	0.29	2	0.049	0.23	AD	iso	ENST00000379868.5_2	DDX58	DDX58-201	protein_coding
140	-0.54	0.26	-2.1	0.037	NA	AD	iso	ENST00000635077.1_2	BAG1	BAG1-211	protein_coding
140	-0.66	0.21	-3.2	0.0013	NA	AD	iso	ENST00000371623.5_1	PTGDS	PTGDS-201	protein_coding
730	-0.65	0.24	-2.7	0.0074	0.12	AD	iso	ENST00000371625.8_3	PTGDS	PTGDS-202	protein_coding
33	-0.47	0.19	-2.5	0.012	NA	AD	iso	ENST00000413913.2_2	PTGDS	PTGDS-203	protein_coding
14	-0.72	0.22	-3.3	0.0011	NA	AD	iso	ENST00000462514.1_1	PTGDS	PTGDS-208	protein_coding
78	-0.63	0.2	-3.1	0.0018	NA	AD	iso	ENST00000492068.2_1	PTGDS	PTGDS-209	protein_coding
31	-0.58	0.18	-3.2	0.0012	NA	AD	iso	ENST00000640716.1_1	PTGDS	PTGDS-210	protein_coding
36	-0.47	0.19	-2.5	0.013	NA	AD	iso	ENST00000428193.6_1	RPL28	RPL28-203	protein_coding
14	0.6	0.25	2.4	0.015	NA	AD	iso	ENST00000472035.5_1	ZMIZ1	ZMIZ1-203	protein_coding
47	0.5	0.22	2.3	0.021	NA	AD	iso	ENST00000474190.1_1	CASC3	CASC3-204	protein_coding
11	0.89	0.42	2.1	0.035	NA	AD	iso	ENST00000495350.5_2	CBX1	CBX1-205	protein_coding
77	-0.5	0.2	-2.5	0.014	NA	AD	iso	ENST00000574442.1_2	CAMTA2	CAMTA2-210	protein_coding
51	1.3	0.3	4.3	1.5e-05	NA	AD	iso	ENST00000578491.1_2	DDX5	DDX5-208	protein_coding
51	0.48	0.23	2	0.042	NA	AD	iso	ENST00000589825.5_2	EFTUD2	EFTUD2-215	protein_coding
46	-0.39	0.18	-2.2	0.03	NA	AD	iso	ENST00000571418.5_3	DPH1	DPH1-206	protein_coding
140	0.47	0.23	2	0.045	NA	AD	iso	ENST00000581185.5_1	WSB1	WSB1-209	protein_coding
43	0.73	0.24	3	0.0024	NA	AD	iso	ENST00000226522.8_2	LAMTOR3	LAMTOR3-201	protein_coding
210	0.58	0.27	2.2	0.03	NA	AD	iso	ENST00000644545.1_2	MANBA	MANBA-209	protein_coding
23	0.53	0.24	2.2	0.029	NA	AD	iso	ENST00000394668.2_1	RPL34	RPL34-203	protein_coding
110	0.54	0.24	2.2	0.025	NA	AD	iso	ENST00000524552.5_4	HSPA8	HSPA8-203	protein_coding
34	0.7	0.34	2	0.041	NA	AD	iso	ENST00000542376.5_1	DNAJC4	DNAJC4-209	protein_coding
570	0.42	0.16	2.7	0.0078	0.13	AD	iso	ENST00000528851.5_4	MS4A6A	MS4A6A-208	protein_coding
460	0.59	0.28	2.1	0.035	0.2	AD	iso	ENST00000442948.3_2	FOLR3	FOLR3-201	protein_coding
23	0.52	0.24	2.2	0.029	NA	AD	iso	ENST00000545379.1_1	FOLR3	FOLR3-202	protein_coding
100	0.49	0.24	2.1	0.038	NA	AD	iso	ENST00000612844.4_1	FOLR3	FOLR3-205	protein_coding
25	-0.39	0.13	-3.1	0.0018	NA	AD	iso	ENST00000544194.5_1	NAA40	NAA40-209	protein_coding
5.5	-1	0.4	-2.5	0.012	NA	AD	iso	ENST00000545161.1_1	NAA40	NAA40-210	protein_coding
11	-0.68	0.29	-2.4	0.018	NA	AD	iso	ENST00000483285.1_2	NUP98	NUP98-211	protein_coding
150	0.41	0.17	2.4	0.015	NA	AD	iso	ENST00000349215.8_3	HPS5	HPS5-201	protein_coding
99	0.66	0.25	2.7	0.008	NA	AD	iso	ENST00000228438.2_3	CLEC2B	CLEC2B-201	protein_coding
820	0.42	0.15	2.9	0.0042	0.11	AD	iso	ENST00000392474.6_3	CAMKK2	CAMKK2-205	protein_coding
95	0.41	0.17	2.4	0.015	NA	AD	iso	ENST00000360579.11_3	VPS29	VPS29-201	protein_coding
47	0.41	0.19	2.1	0.035	NA	AD	iso	ENST00000551655.1_2	VPS29	VPS29-209	protein_coding
7000	0.71	0.3	2.4	0.018	0.16	AD	iso	ENST00000228928.12_2	OAS3	OAS3-201	protein_coding
4000	0.55	0.21	2.6	0.0092	0.13	AD	iso	ENST00000392583.6_1	OAS2	OAS2-202	protein_coding
130	0.67	0.28	2.4	0.016	NA	AD	iso	ENST00000548941.1_1	OAS2	OAS2-204	protein_coding
190	0.41	0.19	2.2	0.03	NA	AD	iso	ENST00000229314.10_4	GOLT1B	GOLT1B-201	protein_coding
140	0.45	0.21	2.2	0.03	NA	AD	iso	ENST00000646710.1_2	DSE	DSE-216	protein_coding
340	0.38	0.15	2.5	0.012	0.14	AD	iso	ENST00000373715.11_2	SRSF3	SRSF3-202	protein_coding
38	0.6	0.27	2.2	0.029	NA	AD	iso	ENST00000535459.5_2	SOD2	SOD2-207	protein_coding
89	0.43	0.18	2.4	0.018	NA	AD	iso	ENST00000418593.6_2	VNN2	VNN2-203	protein_coding
550	0.47	0.16	2.9	0.0036	0.11	AD	iso	ENST00000361758.8_1	QKI	QKI-204	protein_coding
320	0.4	0.19	2.2	0.031	0.2	AD	iso	ENST00000453779.6_1	QKI	QKI-207	protein_coding
18	-0.4	0.16	-2.4	0.015	NA	AD	iso	ENST00000505064.1_2	CCND3	CCND3-207	protein_coding
150	-0.41	0.16	-2.6	0.0094	NA	AD	iso	ENST00000506830.5_1	CUL9	CUL9-211	protein_coding
210	0.4	0.15	2.7	0.0079	NA	AD	iso	ENST00000503501.1_1	SENP6	SENP6-212	protein_coding
410	0.4	0.15	2.7	0.0072	0.12	AD	iso	ENST00000503970.2_1	MAN2A1	MAN2A1-203	protein_coding
6.6	-0.74	0.3	-2.5	0.012	NA	AD	iso	ENST00000501917.7_3	HSPA9	HSPA9-202	protein_coding
82	-0.43	0.21	-2.1	0.035	NA	AD	iso	ENST00000538026.5_4	SPARC	SPARC-208	protein_coding
31	0.59	0.27	2.2	0.027	NA	AD	iso	ENST00000509425.1_1	CCNG1	CCNG1-206	protein_coding
250	0.5	0.23	2.1	0.034	NA	AD	iso	ENST00000502897.5_1	SUB1	SUB1-203	protein_coding
16	-0.52	0.17	-3.1	0.0021	NA	AD	iso	ENST00000504576.2_3	SLC12A7	SLC12A7-202	protein_coding
16	-0.41	0.15	-2.8	0.0051	NA	AD	iso	ENST00000513268.1_2	MACROH2A1	MACROH2A1-220	protein_coding
410	0.55	0.24	2.3	0.019	0.16	AD	iso	ENST00000334035.9_2	CPEB4	CPEB4-202	protein_coding
290	0.78	0.33	2.4	0.018	0.16	AD	iso	ENST00000419510.6_2	BCL6	BCL6-203	protein_coding
46	0.82	0.4	2.1	0.04	NA	AD	iso	ENST00000393627.6_1	CD86	CD86-203	protein_coding
1400	0.4	0.13	3.2	0.0015	0.088	AD	iso	ENST00000264951.8_2	XRN1	XRN1-201	protein_coding
34	0.95	0.41	2.3	0.019	NA	AD	iso	ENST00000492396.5_2	PDCD10	PDCD10-216	protein_coding
22	-0.43	0.16	-2.7	0.0071	NA	AD	iso	ENST00000463304.1_2	TUSC2	TUSC2-206	protein_coding
24	0.56	0.24	2.4	0.018	NA	AD	iso	ENST00000495401.5_2	RPL24	RPL24-206	protein_coding
170	0.38	0.13	2.9	0.0032	NA	AD	iso	ENST00000445140.6_2	FXR1	FXR1-203	protein_coding
980	0.44	0.13	3.3	0.001	0.087	AD	iso	ENST00000232564.8_3	GNB4	GNB4-201	protein_coding
87	0.62	0.23	2.7	0.0071	NA	AD	iso	ENST00000251775.9_3	SNX4	SNX4-201	protein_coding
39	0.43	0.22	2	0.05	NA	AD	iso	ENST00000498205.5_2	SSR3	SSR3-209	protein_coding
240	-0.4	0.18	-2.3	0.023	NA	AD	iso	ENST00000475721.5_1	EIF4G1	EIF4G1-233	protein_coding
75	-0.58	0.27	-2.1	0.034	NA	AD	iso	ENST00000454704.5_2	GTF3C2	GTF3C2-206	protein_coding
24	0.42	0.2	2.1	0.032	NA	AD	iso	ENST00000649426.1_2	IFIH1	IFIH1-204	protein_coding
270	0.7	0.34	2	0.042	NA	AD	iso	ENST00000649554.1_2	IFIH1	IFIH1-205	protein_coding
1100	0.42	0.16	2.6	0.0084	0.13	AD	iso	ENST00000649979.2_4	IFIH1	IFIH1-206	protein_coding
420	0.42	0.15	2.7	0.0063	0.12	AD	iso	ENST00000437150.7_3	GCA	GCA-204	protein_coding
30	0.43	0.21	2	0.045	NA	AD	iso	ENST00000491592.1_2	RTN4	RTN4-215	protein_coding
750	0.57	0.28	2	0.044	0.22	AD	iso	ENST00000361099.7_4	STAT1	STAT1-201	protein_coding
1600	0.68	0.19	3.6	0.00031	0.074	AD	iso	ENST00000540176.6_2	STAT1	STAT1-212	protein_coding
960	0.67	0.34	2	0.048	0.23	AD	iso	ENST00000673734.1_1	STAT1	STAT1-214	protein_coding
320	0.46	0.19	2.4	0.017	0.16	AD	iso	ENST00000674081.1_1	STAT1	STAT1-229	protein_coding
510	0.43	0.19	2.3	0.022	0.17	AD	iso	ENST00000338435.8_4	GLS	GLS-202	protein_coding
120	0.39	0.15	2.7	0.0078	NA	AD	iso	ENST00000453734.1_3	USP34	USP34-205	protein_coding
110	0.39	0.18	2.1	0.033	NA	AD	iso	ENST00000264255.8_4	TXNDC9	TXNDC9-201	protein_coding
34	-0.93	0.45	-2	0.041	NA	AD	iso	ENST00000470974.1_1	GNLY	GNLY-204	protein_coding
72	0.59	0.23	2.5	0.011	NA	AD	iso	ENST00000409810.6_2	CHMP3	CHMP3-205	protein_coding
26	-0.42	0.2	-2.1	0.038	NA	AD	iso	ENST00000461417.5_1	STK16	STK16-206	protein_coding
14	1	0.4	2.6	0.011	NA	AD	iso	ENST00000478904.5_2	ORC4	ORC4-207	protein_coding
350	0.38	0.17	2.3	0.023	0.18	AD	iso	ENST00000264110.7_4	ATF2	ATF2-201	protein_coding
10	-0.76	0.25	-3	0.0023	NA	AD	iso	ENST00000492192.1_2	AAK1	AAK1-208	protein_coding
390	0.48	0.15	3.1	0.002	0.098	AD	iso	ENST00000433529.7_4	TIA1	TIA1-205	protein_coding
16	-0.86	0.36	-2.4	0.019	NA	AD	iso	ENST00000495774.1_2	TIA1	TIA1-217	protein_coding
630	0.56	0.18	3	0.0023	0.098	AD	iso	ENST00000367634.6_2	RALGPS2	RALGPS2-203	protein_coding
67	0.39	0.14	2.7	0.0067	NA	AD	iso	ENST00000466448.4_3	SRSF4	SRSF4-202	protein_coding
240	-0.45	0.19	-2.4	0.018	NA	AD	iso	ENST00000468818.1_1	ATP5PB	ATP5PB-204	protein_coding
180	0.42	0.16	2.6	0.011	NA	AD	iso	ENST00000369489.10_3	CD58	CD58-202	protein_coding
14	0.87	0.33	2.6	0.0088	NA	AD	iso	ENST00000525789.1_1	LGALS8	LGALS8-218	protein_coding
28	0.71	0.31	2.3	0.024	NA	AD	iso	ENST00000461384.6_2	GBP3	GBP3-205	protein_coding
4000	0.4	0.17	2.4	0.019	0.16	AD	iso	ENST00000370473.5_3	GBP1	GBP1-201	protein_coding
53	0.47	0.2	2.3	0.019	NA	AD	iso	ENST00000459831.1_2	GBP1	GBP1-202	protein_coding
30	0.43	0.21	2	0.043	NA	AD	iso	ENST00000493139.1_2	GBP1	GBP1-207	protein_coding
48	0.41	0.2	2	0.046	NA	AD	iso	ENST00000495131.1_2	GBP1	GBP1-208	protein_coding
9.5	-0.4	0.18	-2.2	0.026	NA	AD	iso	ENST00000486720.1_2	APH1A	APH1A-208	protein_coding
61	0.55	0.26	2.1	0.034	NA	AD	iso	ENST00000491378.1_2	RSRP1	RSRP1-206	protein_coding
81	0.88	0.26	3.4	0.00065	NA	AD	iso	ENST00000569495.5_2	RSRP1	RSRP1-221	protein_coding
57	-0.4	0.17	-2.4	0.018	NA	AD	iso	ENST00000487493.1_1	MAN1C1	MAN1C1-206	protein_coding
140	0.41	0.18	2.2	0.025	NA	AD	iso	ENST00000361433.6_1	LRMP	LRMP-202	protein_coding
38	0.47	0.21	2.2	0.027	NA	AD	iso	ENST00000503196.5_4	FBXL5	FBXL5-203	protein_coding
190	0.44	0.2	2.2	0.026	NA	AD	iso	ENST00000509314.5_2	FBXL5	FBXL5-207	protein_coding
170	0.41	0.19	2.2	0.028	NA	AD	iso	ENST00000590769.5_2	UBN1	UBN1-208	protein_coding
140	0.43	0.18	2.4	0.018	NA	AD	iso	ENST00000237889.9_2	NDUFB3	NDUFB3-201	protein_coding
32	0.47	0.14	3.5	0.00056	NA	AD	iso	ENST00000511807.1_1	UBE2B	UBE2B-208	protein_coding
290	0.51	0.17	3	0.0025	0.098	AD	iso	ENST00000373855.5_3	CNTRL	CNTRL-207	protein_coding
380	0.4	0.17	2.3	0.02	0.16	AD	iso	ENST00000527449.1_1	RBM25	RBM25-206	protein_coding
320	-0.43	0.15	-2.9	0.0039	0.11	AD	iso	ENST00000535815.5_3	GPR68	GPR68-204	protein_coding
160	0.38	0.14	2.7	0.0063	NA	AD	iso	ENST00000495673.1_1	YPEL5	YPEL5-210	protein_coding
350	0.42	0.21	2	0.047	0.23	AD	iso	ENST00000238875.10_2	LGALSL	LGALSL-201	protein_coding
2600	0.4	0.14	2.8	0.0047	0.11	AD	iso	ENST00000650315.1_1	OGFRL1	OGFRL1-203	protein_coding
5100	0.54	0.25	2.2	0.027	0.19	AD	iso	ENST00000371818.9_2	IFIT3	IFIT3-202	protein_coding
360	0.63	0.22	2.8	0.0052	0.11	AD	iso	ENST00000371826.4_2	IFIT2	IFIT2-201	protein_coding
9400	0.54	0.22	2.5	0.013	0.14	AD	iso	ENST00000611722.1_2	IFIT2	IFIT2-202	protein_coding
330	0.38	0.16	2.4	0.018	0.16	AD	iso	ENST00000369603.10_3	SMNDC1	SMNDC1-202	protein_coding
110	-0.54	0.27	-2	0.048	NA	AD	iso	ENST00000495001.1_2	ARMH3	ARMH3-205	protein_coding
110	0.51	0.14	3.5	0.0004	NA	AD	iso	ENST00000393053.6_1	TMPO	TMPO-204	protein_coding
42	0.38	0.17	2.2	0.025	NA	AD	iso	ENST00000551727.5_4	NFYB	NFYB-205	protein_coding
300	-0.38	0.19	-2	0.046	0.23	AD	iso	ENST00000439080.6_1	TARDBP	TARDBP-203	protein_coding
290	0.39	0.17	2.4	0.017	0.16	AD	iso	ENST00000316963.8_3	LYPLA1	LYPLA1-201	protein_coding
86	0.44	0.14	3.3	0.0011	NA	AD	iso	ENST00000570473.5_2	TRIM25	TRIM25-203	protein_coding
80	0.41	0.19	2.1	0.035	NA	AD	iso	ENST00000570749.5_2	TRIM25	TRIM25-204	protein_coding
14	0.65	0.31	2.1	0.039	NA	AD	iso	ENST00000572550.1_2	TRIM25	TRIM25-206	protein_coding
24	0.69	0.35	2	0.05	NA	AD	iso	ENST00000573108.1_2	TRIM25	TRIM25-207	protein_coding
130	0.39	0.18	2.2	0.029	NA	AD	iso	ENST00000367510.8_2	RNF2	RNF2-202	protein_coding
450	0.38	0.18	2.1	0.033	0.2	AD	iso	ENST00000264474.4_2	CSTA	CSTA-201	protein_coding
41	0.41	0.2	2	0.041	NA	AD	iso	ENST00000546450.1_1	TBC1D15	TBC1D15-213	protein_coding
4300	0.42	0.13	3.1	0.002	0.097	AD	iso	ENST00000241261.7_3	TNFSF10	TNFSF10-201	protein_coding
900	0.67	0.23	2.8	0.0044	0.11	AD	iso	ENST00000420541.6_2	TNFSF10	TNFSF10-202	protein_coding
9.8	0.55	0.2	2.7	0.0071	NA	AD	iso	ENST00000430881.1_2	TNFSF10	TNFSF10-203	protein_coding
22	0.53	0.24	2.2	0.031	NA	AD	iso	ENST00000472804.1_2	TNFSF10	TNFSF10-205	protein_coding
480	0.7	0.26	2.7	0.0061	0.12	AD	iso	ENST00000493317.1_1	RPL21	RPL21-210	protein_coding
18	0.47	0.2	2.3	0.02	NA	AD	iso	ENST00000475860.1_2	MTERF4	MTERF4-214	protein_coding
8.5	1.5	0.65	2.4	0.018	NA	AD	iso	ENST00000576247.1_2	ZC3H7A	ZC3H7A-217	protein_coding
530	0.39	0.17	2.2	0.025	0.18	AD	iso	ENST00000432293.2_1	SEPTIN7	SEPTIN7-205	protein_coding
9.6	0.8	0.37	2.2	0.031	NA	AD	iso	ENST00000485569.1_3	SEPTIN7	SEPTIN7-209	protein_coding
78	0.54	0.24	2.3	0.022	NA	AD	iso	ENST00000495810.1_2	HNRNPA2B1	HNRNPA2B1-207	protein_coding
41	0.72	0.34	2.1	0.034	NA	AD	iso	ENST00000409467.6_3	NT5C3A	NT5C3A-203	protein_coding
18	0.47	0.21	2.2	0.025	NA	AD	iso	ENST00000409787.4_2	NT5C3A	NT5C3A-204	protein_coding
170	0.85	0.29	2.9	0.0034	NA	AD	iso	ENST00000643244.1_3	NT5C3A	NT5C3A-212	protein_coding
70	-0.45	0.14	-3.3	0.00088	NA	AD	iso	ENST00000549271.1_2	DDX54	DDX54-206	protein_coding
36	0.48	0.19	2.5	0.013	NA	AD	iso	ENST00000591254.1_2	TRIR	TRIR-204	protein_coding
18	0.92	0.27	3.3	0.00082	NA	AD	iso	ENST00000464491.5_2	METTL8	METTL8-213	protein_coding
39	0.39	0.12	3.2	0.0013	NA	AD	iso	ENST00000414946.1_3	NMI	NMI-202	protein_coding
570	0.47	0.22	2.2	0.032	0.2	AD	iso	ENST00000243347.5_2	TNFAIP6	TNFAIP6-201	protein_coding
32	-0.38	0.18	-2.2	0.031	NA	AD	iso	ENST00000407441.4_1	ACSL3	ACSL3-203	protein_coding
110	-0.48	0.15	-3.3	0.00099	NA	AD	iso	ENST00000609257.5_3	PLCG1	PLCG1-217	protein_coding
18	0.43	0.21	2.1	0.039	NA	AD	iso	ENST00000538947.5_2	ZBP1	ZBP1-207	protein_coding
110	0.4	0.12	3.2	0.0014	NA	AD	iso	ENST00000418807.7_3	NAGK	NAGK-202	protein_coding
240	0.42	0.21	2	0.045	NA	AD	iso	ENST00000514372.5_4	ATP8A1	ATP8A1-209	protein_coding
27	-0.5	0.2	-2.6	0.01	NA	AD	iso	ENST00000529930.1_1	ZNF576	ZNF576-205	protein_coding
72	-0.45	0.15	-2.9	0.0034	NA	AD	iso	ENST00000644693.1_2	SERPINB6	SERPINB6-214	protein_coding
61	-0.48	0.15	-3.2	0.0015	NA	AD	iso	ENST00000645580.1_2	SERPINB6	SERPINB6-220	protein_coding
25	-1.1	0.3	-3.8	0.00017	NA	AD	iso	ENST00000505344.1_3	ABCC10	ABCC10-210	protein_coding
21	-0.48	0.23	-2	0.041	NA	AD	iso	ENST00000621356.3_3	RPS10	RPS10-205	protein_coding
1100	0.39	0.14	2.9	0.004	0.11	AD	iso	ENST00000397511.6_2	SSR1	SSR1-202	protein_coding
26	0.5	0.22	2.3	0.022	NA	AD	iso	ENST00000379715.10_3	EEF1E1	EEF1E1-201	protein_coding
270	-0.73	0.35	-2.1	0.034	NA	AD	iso	ENST00000563130.5_2	CNOT1	CNOT1-204	protein_coding
50	0.57	0.22	2.6	0.0086	NA	AD	iso	ENST00000459982.5_2	IRF1	IRF1-206	protein_coding
160	0.47	0.23	2.1	0.038	NA	AD	iso	ENST00000414665.5_4	MBOAT7	MBOAT7-204	protein_coding
36	0.5	0.25	2	0.047	NA	AD	iso	ENST00000464098.5_2	MBOAT7	MBOAT7-209	protein_coding
52	-0.44	0.11	-3.9	8.7e-05	NA	AD	iso	ENST00000482718.1_1	SLC2A4RG	SLC2A4RG-204	protein_coding
20	-0.59	0.23	-2.6	0.0095	NA	AD	iso	ENST00000464438.1_1	PPDPF	PPDPF-203	protein_coding
22	0.44	0.22	2	0.042	NA	AD	iso	ENST00000479999.1_1	INSIG2	INSIG2-205	protein_coding
66	0.42	0.14	3	0.0025	NA	AD	iso	ENST00000598607.1_6	GTF2F1	GTF2F1-206	protein_coding
360	-1	0.52	-2	0.046	0.23	AD	iso	ENST00000418646.5_4	GPCPD1	GPCPD1-202	protein_coding
17	0.58	0.22	2.6	0.0095	NA	AD	iso	ENST00000464452.1_1	PANK2	PANK2-203	protein_coding
17	-0.68	0.29	-2.4	0.018	NA	AD	iso	ENST00000489071.5_1	ERGIC3	ERGIC3-218	protein_coding
120	-0.54	0.23	-2.4	0.016	NA	AD	iso	ENST00000555055.6_3	XRCC3	XRCC3-211	protein_coding
390	0.42	0.19	2.2	0.027	0.19	AD	iso	ENST00000439527.6_2	UBA2	UBA2-202	protein_coding
11	-1.1	0.49	-2.3	0.022	NA	AD	iso	ENST00000599680.1_2	IRF3	IRF3-224	protein_coding
120	0.4	0.13	3	0.0028	NA	AD	iso	ENST00000546010.6_1	STAT5A	STAT5A-207	protein_coding
40	-0.75	0.34	-2.2	0.029	NA	AD	iso	ENST00000586589.5_2	BECN1	BECN1-205	protein_coding
24	-0.41	0.15	-2.7	0.0064	NA	AD	iso	ENST00000589493.1_2	BECN1	BECN1-210	protein_coding
250	0.51	0.25	2.1	0.038	NA	AD	iso	ENST00000438792.6_2	KTN1	KTN1-207	protein_coding
320	0.48	0.18	2.7	0.0066	0.12	AD	iso	ENST00000247225.7_3	SGPP1	SGPP1-201	protein_coding
150	0.38	0.17	2.2	0.026	NA	AD	iso	ENST00000358365.7_2	RHOT1	RHOT1-203	protein_coding
890	0.52	0.19	2.7	0.0068	0.12	AD	iso	ENST00000462804.2_2	EVI2A	EVI2A-203	protein_coding
66	-0.47	0.13	-3.6	0.00032	NA	AD	iso	ENST00000595715.1_2	MAP2K2	MAP2K2-204	protein_coding
26	-0.39	0.15	-2.6	0.011	NA	AD	iso	ENST00000506561.5_1	IDUA	IDUA-205	protein_coding
33	-0.43	0.18	-2.3	0.019	NA	AD	iso	ENST00000462496.5_1	MACF1	MACF1-210	protein_coding
28	-0.59	0.24	-2.5	0.012	NA	AD	iso	ENST00000574623.1_2	METTL16	METTL16-206	protein_coding
200	0.78	0.34	2.3	0.023	NA	AD	iso	ENST00000398989.2_2	TUBA4A	TUBA4A-203	protein_coding
390	0.42	0.19	2.2	0.028	0.19	AD	iso	ENST00000356239.7_1	AKAP9	AKAP9-201	protein_coding
650	0.42	0.16	2.5	0.011	0.14	AD	iso	ENST00000248594.11_2	PTPN12	PTPN12-201	protein_coding
120	-0.57	0.25	-2.3	0.023	NA	AD	iso	ENST00000401419.7_1	MPST	MPST-203	protein_coding
51	0.65	0.3	2.2	0.031	NA	AD	iso	ENST00000611607.4_2	NDUFA5	NDUFA5-211	protein_coding
190	0.56	0.25	2.2	0.026	NA	AD	iso	ENST00000325795.7_2	ORMDL1	ORMDL1-201	protein_coding
26	0.41	0.2	2	0.043	NA	AD	iso	ENST00000409519.5_2	ORMDL1	ORMDL1-204	protein_coding
260	0.39	0.16	2.4	0.016	NA	AD	iso	ENST00000264108.5_2	HAT1	HAT1-201	protein_coding
87	-0.57	0.25	-2.2	0.025	NA	AD	iso	ENST00000566635.5_2	HERC2	HERC2-208	protein_coding
22	0.44	0.15	3	0.0027	NA	AD	iso	ENST00000515266.1_2	MBD4	MBD4-210	protein_coding
90	-0.48	0.21	-2.2	0.026	NA	AD	iso	ENST00000651586.1_1	SUMF2	SUMF2-222	protein_coding
470	0.39	0.12	3.2	0.0012	0.087	AD	iso	ENST00000395390.6_2	PHF20L1	PHF20L1-210	protein_coding
70	0.57	0.17	3.3	0.0011	NA	AD	iso	ENST00000557265.6_4	SNX6	SNX6-209	protein_coding
11	-0.68	0.26	-2.6	0.0086	NA	AD	iso	ENST00000587362.5_1	MAU2	MAU2-206	protein_coding
95	-0.4	0.16	-2.5	0.012	NA	AD	iso	ENST00000592757.1_2	ABHD17A	ABHD17A-206	protein_coding
6.9	0.72	0.3	2.4	0.018	NA	AD	iso	ENST00000564416.1_4	CBFA2T3	CBFA2T3-207	protein_coding
17	-1.5	0.7	-2.2	0.031	NA	AD	iso	ENST00000476216.5_2	NDUFA10	NDUFA10-211	protein_coding
300	0.68	0.34	2	0.044	0.22	AD	iso	ENST00000481997.5_1	ARPC1B	ARPC1B-216	protein_coding
160	-0.4	0.11	-3.6	0.00027	NA	AD	iso	ENST00000593641.3_1	SSBP4	SSBP4-203	protein_coding
20	-0.39	0.18	-2.2	0.025	NA	AD	iso	ENST00000593564.2_2	LSM4	LSM4-202	protein_coding
110	-0.52	0.19	-2.7	0.0066	NA	AD	iso	ENST00000372220.4_1	POMT1	POMT1-202	protein_coding
8.9	-0.46	0.23	-2	0.044	NA	AD	iso	ENST00000593801.1_2	UBE2M	UBE2M-202	protein_coding
23	0.48	0.18	2.7	0.0063	NA	AD	iso	ENST00000597069.1_2	ZC3H4	ZC3H4-204	protein_coding
50	0.46	0.16	2.8	0.0055	NA	AD	iso	ENST00000595636.1_2	GMFG	GMFG-204	protein_coding
100	0.39	0.14	2.7	0.0073	NA	AD	iso	ENST00000601387.5_2	GMFG	GMFG-210	protein_coding
14	-0.58	0.23	-2.5	0.013	NA	AD	iso	ENST00000594951.1_3	MAP3K10	MAP3K10-206	protein_coding
200	-0.39	0.16	-2.4	0.016	NA	AD	iso	ENST00000456990.1_1	THEMIS2	THEMIS2-207	protein_coding
600	-0.51	0.25	-2	0.042	0.22	AD	iso	ENST00000347037.9_2	SYNE1	SYNE1-202	protein_coding
80	0.5	0.2	2.5	0.011	NA	AD	iso	ENST00000496183.5_2	RBM39	RBM39-241	protein_coding
4.7	-0.98	0.29	-3.3	0.00087	NA	AD	iso	ENST00000490464.1_1	ACSS2	ACSS2-219	protein_coding
39	-0.77	0.3	-2.5	0.011	NA	AD	iso	ENST00000578232.5_1	STARD3	STARD3-211	protein_coding
720	0.41	0.16	2.7	0.008	0.13	AD	iso	ENST00000491895.7_3	GCH1	GCH1-204	protein_coding
29	-0.46	0.15	-3	0.0029	NA	AD	iso	ENST00000563616.1_1	SLX1A	SLX1A-203	protein_coding
6400	0.39	0.15	2.6	0.01	0.14	AD	iso	ENST00000379965.8_2	TRIM22	TRIM22-201	protein_coding
58	0.49	0.2	2.5	0.013	NA	AD	iso	ENST00000414897.5_2	TRIM22	TRIM22-203	protein_coding
6.6	0.43	0.2	2.2	0.028	NA	AD	iso	ENST00000487428.1_1	PTPRE	PTPRE-209	protein_coding
39	0.39	0.12	3.2	0.0015	NA	AD	iso	ENST00000575979.1_1	AC002316.1	AC002316.1-206	protein_coding
560	0.43	0.15	2.8	0.0052	0.11	AD	iso	ENST00000369239.10_3	PNISR	PNISR-201	protein_coding
91	-0.48	0.19	-2.5	0.013	NA	AD	iso	ENST00000506453.1_4	GRSF1	GRSF1-205	protein_coding
14	0.39	0.17	2.3	0.022	NA	AD	iso	ENST00000572030.1_1	KDM6B	KDM6B-205	protein_coding
12	-0.42	0.21	-2	0.048	NA	AD	iso	ENST00000573684.5_4	GPS2	GPS2-212	protein_coding
3800	0.57	0.2	2.8	0.0051	0.11	AD	iso	ENST00000361842.8_4	XAF1	XAF1-202	protein_coding
29	0.68	0.25	2.7	0.0069	NA	AD	iso	ENST00000572495.1_1	XAF1	XAF1-207	protein_coding
17	0.82	0.38	2.2	0.03	NA	AD	iso	ENST00000572546.5_1	XAF1	XAF1-208	protein_coding
23	0.53	0.24	2.2	0.026	NA	AD	iso	ENST00000573518.1_1	XAF1	XAF1-209	protein_coding
230	0.53	0.21	2.5	0.012	NA	AD	iso	ENST00000575369.5_1	XAF1	XAF1-216	protein_coding
95	0.46	0.21	2.2	0.025	NA	AD	iso	ENST00000576724.5_1	XAF1	XAF1-219	protein_coding
70	-0.43	0.13	-3.4	0.00072	NA	AD	iso	ENST00000448755.5_2	PCED1A	PCED1A-204	protein_coding
27	-0.48	0.19	-2.5	0.011	NA	AD	iso	ENST00000474714.5_2	PCED1A	PCED1A-205	protein_coding
18	0.46	0.21	2.2	0.032	NA	AD	iso	ENST00000466384.5_1	DAP3	DAP3-210	protein_coding
290	0.78	0.27	2.9	0.0034	0.11	AD	iso	ENST00000361516.8_3	FCRL2	FCRL2-201	protein_coding
300	0.89	0.29	3	0.0026	0.099	AD	iso	ENST00000368178.3_2	FCRL2	FCRL2-202	protein_coding
16	-0.58	0.19	-3.1	0.0016	NA	AD	iso	ENST00000473382.2_2	DCAF8	DCAF8-210	protein_coding
26	-0.39	0.17	-2.3	0.019	NA	AD	iso	ENST00000471895.1_3	FBXO44	FBXO44-208	protein_coding
210	-0.46	0.12	-3.8	0.00014	NA	AD	iso	ENST00000589685.2_2	BTBD2	BTBD2-207	protein_coding
390	0.5	0.19	2.7	0.0069	0.12	AD	iso	ENST00000552994.5_2	ZFC3H1	ZFC3H1-212	protein_coding
140	0.39	0.19	2	0.041	NA	AD	iso	ENST00000345094.7_1	THUMPD3	THUMPD3-201	protein_coding
190	0.46	0.16	2.9	0.0043	NA	AD	iso	ENST00000256544.8_4	KATNBL1	KATNBL1-201	protein_coding
43	0.38	0.14	2.7	0.007	NA	AD	iso	ENST00000559760.5_2	KATNBL1	KATNBL1-209	protein_coding
150	0.41	0.17	2.4	0.017	NA	AD	iso	ENST00000467362.1_1	CEPT1	CEPT1-203	protein_coding
160	0.58	0.17	3.3	0.00082	NA	AD	iso	ENST00000498239.5_1	CEPT1	CEPT1-209	protein_coding
13	-0.52	0.23	-2.3	0.024	NA	AD	iso	ENST00000444214.6_2	FKBP11	FKBP11-202	protein_coding
220	-0.4	0.16	-2.5	0.012	NA	AD	iso	ENST00000474715.1_2	YWHAQ	YWHAQ-205	protein_coding
2500	0.9	0.41	2.2	0.029	0.19	AD	iso	ENST00000382040.4_2	RSAD2	RSAD2-201	protein_coding
710	0.64	0.32	2	0.049	0.23	AD	iso	ENST00000256722.9_4	CMPK2	CMPK2-201	protein_coding
40	0.39	0.17	2.4	0.019	NA	AD	iso	ENST00000489308.6_1	BTF3L4	BTF3L4-205	protein_coding
520	0.44	0.18	2.4	0.016	0.15	AD	iso	ENST00000648081.1_2	DSC2	DSC2-203	protein_coding
100	0.42	0.21	2	0.047	NA	AD	iso	ENST00000257190.9_1	RNF138	RNF138-201	protein_coding
200	0.44	0.14	3.2	0.0013	NA	AD	iso	ENST00000261593.8_2	RNF138	RNF138-202	protein_coding
440	0.43	0.17	2.5	0.011	0.14	AD	iso	ENST00000456936.4_3	TMED7	TMED7-201	protein_coding
160	-0.56	0.28	-2	0.047	NA	AD	iso	ENST00000337233.8_1	P2RX4	P2RX4-202	protein_coding
96	-0.42	0.19	-2.2	0.031	NA	AD	iso	ENST00000547974.5_1	DTX1	DTX1-203	protein_coding
150	0.38	0.12	3.2	0.0014	NA	AD	iso	ENST00000257604.9_4	TRAFD1	TRAFD1-201	protein_coding
23	0.48	0.2	2.4	0.016	NA	AD	iso	ENST00000441034.2_1	CD36	CD36-212	protein_coding
150	0.56	0.28	2	0.041	NA	AD	iso	ENST00000436062.5_3	PNPLA8	PNPLA8-206	protein_coding
15	0.55	0.25	2.2	0.027	NA	AD	iso	ENST00000393484.2_3	TES	TES-203	protein_coding
82	0.65	0.27	2.4	0.015	NA	AD	iso	ENST00000370300.8_2	MTO1	MTO1-201	protein_coding
310	0.63	0.27	2.3	0.02	0.17	AD	iso	ENST00000389146.10_3	OS9	OS9-204	protein_coding
2700	0.43	0.19	2.2	0.027	0.18	AD	iso	ENST00000310786.10_4	CD164	CD164-202	protein_coding
430	0.41	0.18	2.3	0.021	0.17	AD	iso	ENST00000358577.7_3	MICAL1	MICAL1-201	protein_coding
330	-0.49	0.17	-2.8	0.0046	0.11	AD	iso	ENST00000258098.6_4	RAB11FIP5	RAB11FIP5-201	protein_coding
390	0.45	0.15	3.1	0.0023	0.098	AD	iso	ENST00000549268.1_1	USP15	USP15-213	protein_coding
180	0.47	0.19	2.4	0.016	NA	AD	iso	ENST00000550632.5_1	USP15	USP15-216	protein_coding
38	0.8	0.3	2.6	0.0086	NA	AD	iso	ENST00000544125.1_1	MDM2	MDM2-231	protein_coding
21	-0.65	0.26	-2.5	0.013	NA	AD	iso	ENST00000569068.1_2	CCDC102A	CCDC102A-202	protein_coding
200	1.1	0.33	3.2	0.0012	NA	AD	iso	ENST00000667629.1_2	EGLN1	EGLN1-206	protein_coding
45	0.41	0.15	2.7	0.007	NA	AD	iso	ENST00000463022.1_2	SP110	SP110-208	protein_coding
260	0.5	0.21	2.4	0.015	NA	AD	iso	ENST00000445635.5_2	TMBIM1	TMBIM1-215	protein_coding
250	0.42	0.15	2.7	0.0065	NA	AD	iso	ENST00000360820.7_3	SCYL2	SCYL2-201	protein_coding
1100	0.5	0.18	2.8	0.005	0.11	AD	iso	ENST00000332180.9_1	WASHC4	WASHC4-202	protein_coding
14	0.59	0.25	2.4	0.016	NA	AD	iso	ENST00000488605.1_1	PHF11	PHF11-214	protein_coding
70	0.48	0.17	2.9	0.0039	NA	AD	iso	ENST00000496623.5_3	PHF11	PHF11-218	protein_coding
81	0.43	0.22	2	0.045	NA	AD	iso	ENST00000650237.1_1	ITM2B	ITM2B-210	protein_coding
13	-0.5	0.24	-2.1	0.035	NA	AD	iso	ENST00000557379.1_2	TTC5	TTC5-207	protein_coding
100	0.44	0.15	2.8	0.0046	NA	AD	iso	ENST00000359944.10_1	NDUFB5	NDUFB5-202	protein_coding
78	0.71	0.33	2.1	0.034	NA	AD	iso	ENST00000259043.11_2	TRA2B	TRA2B-201	protein_coding
120	0.39	0.14	2.9	0.0042	NA	AD	iso	ENST00000478396.1_1	MARCHF7	MARCHF7-208	protein_coding
630	0.51	0.18	2.7	0.0061	0.12	AD	iso	ENST00000539065.5_2	MARCHF7	MARCHF7-209	protein_coding
8.7	-1	0.33	-3	0.0029	NA	AD	iso	ENST00000468487.1_2	EPRS1	EPRS1-203	protein_coding
29	-0.43	0.15	-2.9	0.0034	NA	AD	iso	ENST00000421939.5_5	CDK9	CDK9-202	protein_coding
28	-0.43	0.14	-3.2	0.0014	NA	AD	iso	ENST00000497386.5_1	FPGS	FPGS-220	protein_coding
160	-0.4	0.17	-2.4	0.018	NA	AD	iso	ENST00000312316.9_2	DNAJB5	DNAJB5-201	protein_coding
11	-0.39	0.15	-2.5	0.011	NA	AD	iso	ENST00000378911.3_2	DCTN3	DCTN3-203	protein_coding
310	-0.41	0.19	-2.2	0.03	0.19	AD	iso	ENST00000401473.7_1	HMGA1	HMGA1-204	protein_coding
130	-0.44	0.22	-2	0.044	NA	AD	iso	ENST00000376255.4_1	TCF19	TCF19-201	protein_coding
37	0.56	0.21	2.7	0.0078	NA	AD	iso	ENST00000646900.1_1	TLR2	TLR2-208	protein_coding
180	-0.53	0.21	-2.6	0.01	NA	AD	iso	ENST00000541584.5_6	NUMA1	NUMA1-220	protein_coding
51	0.41	0.13	3.1	0.0022	NA	AD	iso	ENST00000529611.5_2	CCDC90B	CCDC90B-213	protein_coding
1200	0.54	0.21	2.6	0.011	0.14	AD	iso	ENST00000393743.8_3	DDX60	DDX60-201	protein_coding
72	0.54	0.23	2.4	0.017	NA	AD	iso	ENST00000511317.1_2	DDX60	DDX60-204	protein_coding
13	0.51	0.22	2.4	0.019	NA	AD	iso	ENST00000527625.5_2	CASP1	CASP1-207	protein_coding
1400	0.77	0.39	2	0.047	0.23	AD	iso	ENST00000370751.10_2	IFI44L	IFI44L-201	protein_coding
35	1.6	0.5	3.1	0.0017	NA	AD	iso	ENST00000476876.5_1	IFI44L	IFI44L-208	protein_coding
600	0.69	0.35	2	0.048	0.23	AD	iso	ENST00000370747.9_2	IFI44	IFI44-201	protein_coding
29	0.82	0.41	2	0.047	NA	AD	iso	ENST00000446486.1_1	IFI44	IFI44-203	protein_coding
35	0.9	0.45	2	0.045	NA	AD	iso	ENST00000470323.5_1	IFI44	IFI44-205	protein_coding
61	0.79	0.33	2.4	0.016	NA	AD	iso	ENST00000476911.1_1	IFI44	IFI44-207	protein_coding
22	-0.84	0.25	-3.4	0.00079	NA	AD	iso	ENST00000498288.1_4	ADCY3	ADCY3-212	protein_coding
660	0.45	0.18	2.6	0.0099	0.13	AD	iso	ENST00000402508.5_2	FBXO11	FBXO11-201	protein_coding
53	-0.42	0.17	-2.5	0.011	NA	AD	iso	ENST00000492225.5_2	FBXO11	FBXO11-209	protein_coding
500	0.57	0.16	3.5	0.00046	0.074	AD	iso	ENST00000359263.9_4	MYOF	MYOF-202	protein_coding
780	0.51	0.24	2.1	0.036	0.21	AD	iso	ENST00000372360.9_3	RPS24	RPS24-202	protein_coding
330	0.53	0.24	2.2	0.027	0.19	AD	iso	ENST00000360356.6_2	PARP9	PARP9-201	protein_coding
2400	0.38	0.15	2.6	0.0087	0.13	AD	iso	ENST00000471785.5_2	PARP9	PARP9-204	protein_coding
230	0.43	0.17	2.6	0.011	NA	AD	iso	ENST00000489652.1_2	PARP9	PARP9-206	protein_coding
66	0.54	0.18	3	0.0029	NA	AD	iso	ENST00000419830.2_1	USP8	USP8-203	protein_coding
440	0.44	0.18	2.4	0.014	0.15	AD	iso	ENST00000559471.6_3	SECISBP2L	SECISBP2L-209	protein_coding
23	0.42	0.2	2.1	0.036	NA	AD	iso	ENST00000506842.1_1	HERC6	HERC6-207	protein_coding
1800	0.61	0.28	2.2	0.029	0.19	AD	iso	ENST00000264350.8_2	HERC5	HERC5-201	protein_coding
84	0.43	0.16	2.6	0.0081	NA	AD	iso	ENST00000509081.5_2	RASGEF1B	RASGEF1B-207	protein_coding
85	-0.65	0.28	-2.3	0.019	NA	AD	iso	ENST00000514987.5_3	NUP54	NUP54-217	protein_coding
640	0.39	0.11	3.5	0.00039	0.074	AD	iso	ENST00000502613.1_3	BMP2K	BMP2K-203	protein_coding
830	0.43	0.17	2.6	0.0086	0.13	AD	iso	ENST00000264908.11_2	ANXA3	ANXA3-201	protein_coding
30	0.56	0.24	2.3	0.019	NA	AD	iso	ENST00000505805.1_1	ANXA3	ANXA3-204	protein_coding
22	-0.81	0.41	-2	0.049	NA	AD	iso	ENST00000638621.1_1	HADH	HADH-212	protein_coding
390	0.41	0.18	2.3	0.023	0.18	AD	iso	ENST00000394854.8_4	PPP3CA	PPP3CA-203	protein_coding
29	-0.42	0.15	-2.8	0.0057	NA	AD	iso	ENST00000460000.5_1	RGS3	RGS3-209	protein_coding
29	-0.65	0.32	-2.1	0.04	NA	AD	iso	ENST00000548490.1_4	YARS2	YARS2-202	protein_coding
22	-0.38	0.18	-2.1	0.04	NA	AD	iso	ENST00000540931.1_1	CLSTN3	CLSTN3-210	protein_coding
11	-0.43	0.19	-2.3	0.02	NA	AD	iso	ENST00000544226.5_1	KLRG1	KLRG1-207	protein_coding
14	-0.42	0.15	-2.7	0.0062	NA	AD	iso	ENST00000547541.1_1	TARBP2	TARBP2-208	protein_coding
39	-0.38	0.14	-2.7	0.007	NA	AD	iso	ENST00000548269.1_2	ITGB7	ITGB7-204	protein_coding
65	-0.38	0.13	-2.9	0.004	NA	AD	iso	ENST00000548706.1_2	ITGB7	ITGB7-205	protein_coding
44	0.5	0.25	2	0.042	NA	AD	iso	ENST00000490923.5_2	CSAD	CSAD-217	protein_coding
410	0.48	0.2	2.4	0.016	0.15	AD	iso	ENST00000620633.4_2	LPAR6	LPAR6-209	protein_coding
270	0.4	0.16	2.5	0.013	NA	AD	iso	ENST00000457354.7_2	TMX1	TMX1-201	protein_coding
23	0.38	0.18	2.2	0.03	NA	AD	iso	ENST00000555574.1_1	TMX1	TMX1-202	protein_coding
13	0.6	0.27	2.2	0.028	NA	AD	iso	ENST00000559571.1_2	NIPA2	NIPA2-206	protein_coding
170	-0.43	0.14	-3.2	0.0014	NA	AD	iso	ENST00000339624.9_4	SERF2	SERF2-202	protein_coding
78	0.39	0.17	2.3	0.024	NA	AD	iso	ENST00000560491.2_2	LYSMD2	LYSMD2-204	protein_coding
400	0.56	0.26	2.1	0.035	0.2	AD	iso	ENST00000612191.4_2	BNIP2	BNIP2-213	protein_coding
24	0.98	0.47	2.1	0.036	NA	AD	iso	ENST00000267869.8_2	GTF2A2	GTF2A2-201	protein_coding
51	-0.78	0.37	-2.1	0.035	NA	AD	iso	ENST00000561851.5_1	UBE2Q2	UBE2Q2-204	protein_coding
210	0.41	0.15	2.7	0.0063	NA	AD	iso	ENST00000267950.12_2	ETFA	ETFA-201	protein_coding
320	0.66	0.22	3	0.0024	0.098	AD	iso	ENST00000267953.4_3	BCL2A1	BCL2A1-201	protein_coding
310	0.45	0.19	2.4	0.017	0.16	AD	iso	ENST00000561277.5_2	TSPAN3	TSPAN3-210	protein_coding
33	-0.48	0.17	-2.8	0.0047	NA	AD	iso	ENST00000570257.6_4	MAN2C1	MAN2C1-243	protein_coding
27	0.52	0.25	2.1	0.038	NA	AD	iso	ENST00000561461.5_1	IQGAP1	IQGAP1-217	protein_coding
9.1	-0.61	0.29	-2.1	0.036	NA	AD	iso	ENST00000562542.1_1	KATNB1	KATNB1-202	protein_coding
33	0.4	0.17	2.4	0.018	NA	AD	iso	ENST00000437314.3_1	NUDT7	NUDT7-202	protein_coding
28	0.4	0.17	2.3	0.023	NA	AD	iso	ENST00000268595.3_3	CMTM2	CMTM2-201	protein_coding
6.5	-0.46	0.21	-2.2	0.027	NA	AD	iso	ENST00000564836.1_2	DEF8	DEF8-215	protein_coding
15	-0.89	0.32	-2.8	0.0049	NA	AD	iso	ENST00000625802.2_1	IMPA2	IMPA2-212	protein_coding
440	1.6	0.64	2.4	0.015	0.15	AD	iso	ENST00000572457.5_2	ARRB2	ARRB2-210	protein_coding
19	-1	0.37	-2.7	0.0065	NA	AD	iso	ENST00000576037.1_2	MINK1	MINK1-212	protein_coding
47	-0.4	0.16	-2.5	0.012	NA	AD	iso	ENST00000571874.6_1	ANAPC11	ANAPC11-206	protein_coding
43	-0.86	0.25	-3.5	0.0005	NA	AD	iso	ENST00000576432.5_1	TBCD	TBCD-220	protein_coding
7.3	-0.56	0.25	-2.3	0.023	NA	AD	iso	ENST00000572733.1_1	RPTOR	RPTOR-204	protein_coding
630	0.42	0.18	2.4	0.017	0.16	AD	iso	ENST00000586834.1_3	ZCCHC2	ZCCHC2-204	protein_coding
68	0.58	0.18	3.3	0.00097	NA	AD	iso	ENST00000316660.6_1	PMAIP1	PMAIP1-202	protein_coding
440	-0.39	0.18	-2.2	0.03	0.19	AD	iso	ENST00000541774.5_1	ERBB2	ERBB2-204	protein_coding
220	0.75	0.24	3.2	0.0014	NA	AD	iso	ENST00000269593.5_2	IGFBP4	IGFBP4-201	protein_coding
33	-0.58	0.19	-3.1	0.0023	NA	AD	iso	ENST00000585769.5_2	TXNL4A	TXNL4A-204	protein_coding
100	-0.39	0.17	-2.3	0.024	NA	AD	iso	ENST00000593913.5_2	ADAMTS10	ADAMTS10-204	protein_coding
110	-0.67	0.2	-3.4	0.00059	NA	AD	iso	ENST00000595838.5_2	ADAMTS10	ADAMTS10-205	protein_coding
89	-0.47	0.2	-2.3	0.021	NA	AD	iso	ENST00000596851.5_2	ADAMTS10	ADAMTS10-209	protein_coding
12	-0.6	0.3	-2	0.049	NA	AD	iso	ENST00000601872.1_2	ADAMTS10	ADAMTS10-213	protein_coding
49	-0.44	0.15	-2.9	0.0038	NA	AD	iso	ENST00000603221.5_2	ADAMTS10	ADAMTS10-214	protein_coding
91	-0.46	0.16	-2.8	0.0053	NA	AD	iso	ENST00000416591.5_1	CAPN10	CAPN10-209	protein_coding
300	0.56	0.25	2.3	0.023	0.18	AD	iso	ENST00000597222.2_3	MYO1F	MYO1F-210	protein_coding
17	-0.43	0.21	-2	0.043	NA	AD	iso	ENST00000586787.1_2	ZNF787	ZNF787-201	protein_coding
150	0.83	0.28	3	0.003	NA	AD	iso	ENST00000477613.6_1	RPL13A	RPL13A-208	protein_coding
27	-0.49	0.2	-2.5	0.014	NA	AD	iso	ENST00000594932.5_2	NOSIP	NOSIP-203	protein_coding
23	-1.5	0.75	-2	0.041	NA	AD	iso	ENST00000446538.5_1	PRKACB	PRKACB-213	protein_coding
200	0.4	0.19	2	0.041	NA	AD	iso	ENST00000370298.9_2	MTF2	MTF2-201	protein_coding
130	0.63	0.29	2.1	0.033	NA	AD	iso	ENST00000497404.1_1	CD53	CD53-205	protein_coding
220	0.39	0.17	2.3	0.019	NA	AD	iso	ENST00000392129.10_3	TMCO1	TMCO1-202	protein_coding
4.9	-0.64	0.25	-2.5	0.011	NA	AD	iso	ENST00000463735.1_1	UFC1	UFC1-202	protein_coding
31	-0.47	0.12	-3.8	0.00014	NA	AD	iso	ENST00000466452.1_1	PPOX	PPOX-206	protein_coding
100	0.41	0.15	2.7	0.0068	NA	AD	iso	ENST00000471026.5_1	FCGR2A	FCGR2A-207	protein_coding
360	1.1	0.35	3.2	0.0013	0.087	AD	iso	ENST00000497286.5_2	FCRL5	FCRL5-208	protein_coding
110	-0.97	0.42	-2.3	0.023	NA	AD	iso	ENST00000447964.1_1	TOR1AIP1	TOR1AIP1-203	protein_coding
20	-0.53	0.21	-2.6	0.011	NA	AD	iso	ENST00000368829.3_4	MRPL9	MRPL9-201	protein_coding
6800	0.62	0.24	2.6	0.0087	0.13	AD	iso	ENST00000368733.4_3	S100A8	S100A8-202	protein_coding
50	0.63	0.22	2.8	0.0048	NA	AD	iso	ENST00000484014.5_1	SLC27A3	SLC27A3-209	protein_coding
150	-0.38	0.16	-2.3	0.019	NA	AD	iso	ENST00000618875.4_1	SOX13	SOX13-210	protein_coding
970	0.43	0.14	3	0.003	0.1	AD	iso	ENST00000280098.9_2	SPOPL	SPOPL-201	protein_coding
42	-0.39	0.16	-2.4	0.016	NA	AD	iso	ENST00000272937.10_3	HES6	HES6-201	protein_coding
83	0.4	0.13	3	0.0028	NA	AD	iso	ENST00000402314.6_2	ATG3	ATG3-202	protein_coding
59	0.47	0.18	2.6	0.0093	NA	AD	iso	ENST00000496423.1_2	ATG3	ATG3-209	protein_coding
23	0.48	0.22	2.1	0.032	NA	AD	iso	ENST00000474505.5_1	EIF2A	EIF2A-210	protein_coding
10	-0.65	0.25	-2.6	0.011	NA	AD	iso	ENST00000505277.1_1	ATP10D	ATP10D-204	protein_coding
75	0.4	0.17	2.4	0.017	NA	AD	iso	ENST00000643561.1_1	CISD2	CISD2-204	protein_coding
640	0.54	0.15	3.7	0.00019	0.069	AD	iso	ENST00000274056.11_2	MARCHF1	MARCHF1-201	protein_coding
170	0.44	0.14	3.1	0.0021	NA	AD	iso	ENST00000606497.1_1	MARCHF6	MARCHF6-214	protein_coding
330	0.39	0.15	2.7	0.0069	0.12	AD	iso	ENST00000515007.6_4	LHFPL2	LHFPL2-207	protein_coding
370	1.3	0.62	2	0.041	0.22	AD	iso	ENST00000379730.7_1	IQGAP2	IQGAP2-202	protein_coding
440	0.42	0.17	2.5	0.013	0.14	AD	iso	ENST00000415806.2_1	TNFAIP8	TNFAIP8-203	protein_coding
79	0.47	0.21	2.3	0.024	NA	AD	iso	ENST00000632434.1_1	COMMD10	COMMD10-207	protein_coding
130	0.46	0.17	2.7	0.006	NA	AD	iso	ENST00000274496.10_3	YIPF5	YIPF5-201	protein_coding
380	1.1	0.52	2	0.042	0.22	AD	iso	ENST00000274542.6_3	RNF145	RNF145-201	protein_coding
11	-0.56	0.16	-3.6	0.00035	NA	AD	iso	ENST00000506064.1_2	FAM193B	FAM193B-205	protein_coding
39	0.38	0.17	2.3	0.023	NA	AD	iso	ENST00000487975.5_1	FGD2	FGD2-207	protein_coding
110	0.46	0.18	2.6	0.0092	NA	AD	iso	ENST00000328747.11_1	ZNF92	ZNF92-201	protein_coding
19	-0.6	0.29	-2.1	0.036	NA	AD	iso	ENST00000583310.1_1	TLK2	TLK2-215	protein_coding
77	0.4	0.13	3	0.0029	NA	AD	iso	ENST00000519480.5_1	MCPH1	MCPH1-203	protein_coding
460	0.48	0.14	3.5	0.00052	0.074	AD	iso	ENST00000332246.10_2	CSGALNACT1	CSGALNACT1-201	protein_coding
14	0.43	0.19	2.3	0.021	NA	AD	iso	ENST00000524213.5_2	CSGALNACT1	CSGALNACT1-216	protein_coding
21	0.69	0.26	2.6	0.0082	NA	AD	iso	ENST00000522687.5_2	BIN3	BIN3-211	protein_coding
65	0.49	0.18	2.8	0.0053	NA	AD	iso	ENST00000522904.5_1	TACC1	TACC1-223	protein_coding
18	0.55	0.26	2.1	0.034	NA	AD	iso	ENST00000524193.1_1	TACC1	TACC1-228	protein_coding
340	0.43	0.16	2.7	0.0065	0.12	AD	iso	ENST00000424479.7_4	PLPP5	PLPP5-203	protein_coding
7.2	0.58	0.24	2.4	0.015	NA	AD	iso	ENST00000527758.1_2	PLPP5	PLPP5-206	protein_coding
180	0.42	0.17	2.5	0.013	NA	AD	iso	ENST00000528814.1_2	PLPP5	PLPP5-208	protein_coding
79	0.47	0.22	2.1	0.037	NA	AD	iso	ENST00000497250.1	CBWD5	CBWD5-020	protein_coding
120	-0.59	0.27	-2.2	0.029	NA	AD	iso	ENST00000645398.1_2	CEP78	CEP78-220	protein_coding
62	-0.4	0.16	-2.4	0.015	NA	AD	iso	ENST00000538954.5_2	STOM	STOM-203	protein_coding
190	-0.39	0.18	-2.2	0.03	NA	AD	iso	ENST00000545297.5_2	SURF4	SURF4-207	protein_coding
180	0.39	0.13	3	0.0026	NA	AD	iso	ENST00000277575.5_2	USP6NL	USP6NL-201	protein_coding
17	-1	0.5	-2.1	0.04	NA	AD	iso	ENST00000432508.3_1	MTG1	MTG1-202	protein_coding
390	-0.41	0.18	-2.4	0.018	0.16	AD	iso	ENST00000527911.5_2	DGKZ	DGKZ-214	protein_coding
50	-0.72	0.35	-2.1	0.04	NA	AD	iso	ENST00000534802.1_1	DGKZ	DGKZ-224	protein_coding
800	0.56	0.27	2.1	0.035	0.2	AD	iso	ENST00000278407.9_2	SERPING1	SERPING1-201	protein_coding
41	0.51	0.26	2	0.05	NA	AD	iso	ENST00000457869.1_1	SERPING1	SERPING1-207	protein_coding
160	0.7	0.28	2.5	0.014	NA	AD	iso	ENST00000531133.5_1	SERPING1	SERPING1-210	protein_coding
57	-0.4	0.13	-3	0.0027	NA	AD	iso	ENST00000525314.5_2	ARFGAP2	ARFGAP2-206	protein_coding
94	0.38	0.16	2.3	0.021	NA	AD	iso	ENST00000652261.1_2	CCDC82	CCDC82-221	protein_coding
130	-0.45	0.14	-3.3	0.001	NA	AD	iso	ENST00000648180.1_3	CAPN5	CAPN5-207	protein_coding
18	-0.56	0.25	-2.2	0.027	NA	AD	iso	ENST00000529248.5_6	PAK1	PAK1-213	protein_coding
130	-0.54	0.18	-3	0.0026	NA	AD	iso	ENST00000422465.6_1	RPS3	RPS3-202	protein_coding
110	-0.69	0.17	-4	6.7e-05	NA	AD	iso	ENST00000339772.9_1	GLB1L2	GLB1L2-201	protein_coding
130	0.4	0.18	2.3	0.023	NA	AD	iso	ENST00000563987.5_2	ALDOA	ALDOA-207	protein_coding
940	0.38	0.19	2	0.049	0.23	AD	iso	ENST00000369168.4_1	FCGR1A	FCGR1A-201	protein_coding
86	0.5	0.17	2.9	0.004	NA	AD	iso	ENST00000489479.1_1	FCGR1A	FCGR1A-203	protein_coding
52	-0.56	0.23	-2.4	0.016	NA	AD	iso	ENST00000492245.5_3	SAP18	SAP18-206	protein_coding
80	0.49	0.19	2.6	0.0097	NA	AD	iso	ENST00000410115.5_1	HNMT	HNMT-204	protein_coding
650	-0.43	0.18	-2.4	0.015	0.15	AD	iso	ENST00000280258.6_2	PRSS23	PRSS23-201	protein_coding
70	-0.48	0.2	-2.5	0.013	NA	AD	iso	ENST00000527521.1_3	PRSS23	PRSS23-202	protein_coding
51	0.44	0.21	2.1	0.035	NA	AD	iso	ENST00000420986.6_4	NKAPD1	NKAPD1-203	protein_coding
120	0.58	0.16	3.6	0.00037	NA	AD	iso	ENST00000345990.8_3	CSNK1G3	CSNK1G3-201	protein_coding
41	-0.46	0.24	-2	0.05	NA	AD	iso	ENST00000428702.6_2	QDPR	QDPR-202	protein_coding
2600	0.42	0.17	2.6	0.011	0.14	AD	iso	ENST00000503407.5_2	ACSL1	ACSL1-203	protein_coding
100	0.63	0.17	3.6	0.00027	NA	AD	iso	ENST00000281471.11_3	AMN1	AMN1-201	protein_coding
3600	0.43	0.16	2.8	0.0057	0.12	AD	iso	ENST00000398136.7_5	TMEM123	TMEM123-202	protein_coding
200	1.3	0.58	2.2	0.027	NA	AD	iso	ENST00000463374.5_1	MBNL1	MBNL1-211	protein_coding
250	0.68	0.2	3.3	0.00083	NA	AD	iso	ENST00000403687.8_2	RASGRP3	RASGRP3-202	protein_coding
130	0.72	0.23	3.1	0.002	NA	AD	iso	ENST00000371930.5_3	ANKRD22	ANKRD22-201	protein_coding
960	0.43	0.19	2.2	0.027	0.18	AD	iso	ENST00000371795.5_2	IFIT5	IFIT5-201	protein_coding
60	-0.46	0.17	-2.6	0.0082	NA	AD	iso	ENST00000502762.4_3	HNRNPDL	HNRNPDL-203	protein_coding
5.3	0.48	0.23	2.1	0.039	NA	AD	iso	ENST00000433557.1_1	UTRN	UTRN-208	protein_coding
40	0.53	0.26	2.1	0.038	NA	AD	iso	ENST00000610793.1_2	ZNF117	ZNF117-203	protein_coding
460	0.46	0.19	2.4	0.016	0.15	AD	iso	ENST00000620222.4_2	ZNF117	ZNF117-204	protein_coding
30	0.71	0.34	2.1	0.037	NA	AD	iso	ENST00000515463.1_1	SRP19	SRP19-210	protein_coding
460	0.46	0.24	2	0.05	0.24	AD	iso	ENST00000440865.2_5	HNRNPU	HNRNPU-204	protein_coding
9.1	-0.52	0.23	-2.3	0.023	NA	AD	iso	ENST00000465428.1_3	CD96	CD96-205	protein_coding
330	0.49	0.24	2	0.044	0.22	AD	iso	ENST00000580104.5_2	TRAPPC8	TRAPPC8-207	protein_coding
57	-0.41	0.15	-2.7	0.0062	NA	AD	iso	ENST00000590965.1_2	UBALD1	UBALD1-206	protein_coding
15	-0.88	0.44	-2	0.046	NA	AD	iso	ENST00000411650.5_2	UBP1	UBP1-203	protein_coding
1600	-0.42	0.14	-3	0.0028	0.1	AD	iso	ENST00000283635.7_4	CD8A	CD8A-201	protein_coding
100	-0.46	0.21	-2.1	0.033	NA	AD	iso	ENST00000430432.5_2	JAZF1	JAZF1-204	protein_coding
48	-0.42	0.17	-2.5	0.012	NA	AD	iso	ENST00000584554.1_2	PITPNC1	PITPNC1-207	protein_coding
86	0.46	0.21	2.2	0.026	NA	AD	iso	ENST00000284818.7_2	LY96	LY96-201	protein_coding
180	0.42	0.15	2.8	0.005	NA	AD	iso	ENST00000285419.8_4	PIP4P2	PIP4P2-201	protein_coding
160	0.59	0.17	3.5	0.00044	NA	AD	iso	ENST00000285518.11_3	AGPAT5	AGPAT5-201	protein_coding
81	-0.41	0.15	-2.6	0.0084	NA	AD	iso	ENST00000495415.5_2	MMS19	MMS19-219	protein_coding
4100	0.39	0.12	3.1	0.0017	0.092	AD	iso	ENST00000339364.10_3	PIK3AP1	PIK3AP1-201	protein_coding
1300	0.42	0.17	2.5	0.012	0.14	AD	iso	ENST00000418596.7_2	FAM126B	FAM126B-202	protein_coding
29	0.43	0.16	2.7	0.0075	NA	AD	iso	ENST00000520106.5_2	SLA	SLA-214	protein_coding
44	0.38	0.16	2.4	0.015	NA	AD	iso	ENST00000522002.5_2	SLA	SLA-217	protein_coding
7.1	-0.52	0.21	-2.4	0.015	NA	AD	iso	ENST00000542072.1_2	TMBIM4	TMBIM4-207	protein_coding
650	0.38	0.12	3.1	0.0018	0.092	AD	iso	ENST00000633367.1_2	TMBIM4	TMBIM4-214	protein_coding
45	-0.46	0.21	-2.2	0.03	NA	AD	iso	ENST00000286777.6_2	RWDD2B	RWDD2B-201	protein_coding
5700	0.58	0.19	3	0.0027	0.1	AD	iso	ENST00000488500.1_2	EEF1A1	EEF1A1-206	protein_coding
62	-0.41	0.13	-3.1	0.002	NA	AD	iso	ENST00000287396.2_2	FBXO32	FBXO32-201	protein_coding
45	-0.43	0.19	-2.3	0.021	NA	AD	iso	ENST00000443022.2_2	FBXO32	FBXO32-202	protein_coding
56	-0.62	0.28	-2.2	0.026	NA	AD	iso	ENST00000496382.1_1	EIF4A2	EIF4A2-225	protein_coding
310	0.39	0.17	2.4	0.017	0.16	AD	iso	ENST00000430046.7_2	FCHO2	FCHO2-202	protein_coding
260	0.41	0.15	2.7	0.0064	NA	AD	iso	ENST00000288235.9_3	MYO1E	MYO1E-201	protein_coding
210	0.58	0.23	2.5	0.011	NA	AD	iso	ENST00000338785.8_2	DYRK1A	DYRK1A-201	protein_coding
100	0.52	0.26	2	0.048	NA	AD	iso	ENST00000419868.1_1	KCNJ15	KCNJ15-210	protein_coding
6800	0.63	0.26	2.4	0.018	0.16	AD	iso	ENST00000398598.8_3	MX1	MX1-202	protein_coding
180	0.65	0.27	2.4	0.018	NA	AD	iso	ENST00000455164.6_2	MX1	MX1-210	protein_coding
80	0.81	0.28	2.9	0.0037	NA	AD	iso	ENST00000486275.1_1	MX1	MX1-215	protein_coding
25	0.86	0.31	2.8	0.0059	NA	AD	iso	ENST00000491110.1_1	MX1	MX1-217	protein_coding
630	-0.44	0.11	-3.8	0.00014	0.069	AD	iso	ENST00000466750.5_1	TNFRSF14	TNFRSF14-210	protein_coding
20	-0.66	0.3	-2.2	0.026	NA	AD	iso	ENST00000378518.5_1	RER1	RER1-204	protein_coding
3.9	0.8	0.35	2.3	0.022	NA	AD	iso	ENST00000580477.1_5	ABHD3	ABHD3-208	protein_coding
34	-0.4	0.14	-2.8	0.0048	NA	AD	iso	ENST00000565083.1_2	RNF166	RNF166-207	protein_coding
36	0.43	0.2	2.2	0.031	NA	AD	iso	ENST00000368019.5_2	USF1	USF1-201	protein_coding
13	-0.61	0.28	-2.2	0.031	NA	AD	iso	ENST00000393366.7_2	ATP5MC1	ATP5MC1-202	protein_coding
100	-0.47	0.13	-3.6	0.00036	NA	AD	iso	ENST00000466561.1_2	ATP13A2	ATP13A2-205	protein_coding
1800	-0.42	0.18	-2.3	0.021	0.17	AD	iso	ENST00000290902.10_3	SPON2	SPON2-201	protein_coding
130	-0.43	0.13	-3.3	0.001	NA	AD	iso	ENST00000400762.7_2	SPON2	SPON2-202	protein_coding
23	-0.58	0.18	-3.1	0.0016	NA	AD	iso	ENST00000502657.1_2	SPON2	SPON2-205	protein_coding
74	-0.59	0.19	-3	0.0025	NA	AD	iso	ENST00000507466.1_2	SPON2	SPON2-211	protein_coding
280	-0.38	0.18	-2.1	0.037	NA	AD	iso	ENST00000512888.1_2	SPON2	SPON2-218	protein_coding
22	-0.4	0.17	-2.3	0.021	NA	AD	iso	ENST00000602705.1_1	CARMIL2	CARMIL2-209	protein_coding
3	0.53	0.24	2.2	0.03	NA	AD	iso	ENST00000495475.1_2	MCM3AP	MCM3AP-209	protein_coding
36	-0.56	0.26	-2.1	0.033	NA	AD	iso	ENST00000291705.11_2	PRMT2	PRMT2-201	protein_coding
94	-0.38	0.15	-2.6	0.01	NA	AD	iso	ENST00000291715.5_3	CLDND2	CLDND2-201	protein_coding
9.1	-0.7	0.2	-3.4	0.00061	NA	AD	iso	ENST00000533135.1_2	PCSK7	PCSK7-213	protein_coding
53	-0.39	0.19	-2	0.041	NA	AD	iso	ENST00000527777.5_1	CD3G	CD3G-203	protein_coding
59	-0.88	0.39	-2.2	0.026	NA	AD	iso	ENST00000292291.10_3	PAQR6	PAQR6-201	protein_coding
89	-0.44	0.18	-2.4	0.016	NA	AD	iso	ENST00000487452.1_2	PPP1R35	PPP1R35-204	protein_coding
30	1.5	0.7	2.2	0.03	NA	AD	iso	ENST00000522528.5_1	LY6E	LY6E-213	protein_coding
130	-0.42	0.15	-2.9	0.0039	NA	AD	iso	ENST00000377348.6_2	VPS28	VPS28-202	protein_coding
43	-0.79	0.33	-2.4	0.018	NA	AD	iso	ENST00000523267.1_2	MRNIP	MRNIP-221	protein_coding
19	-0.39	0.18	-2.2	0.025	NA	AD	iso	ENST00000432591.5_2	AP2M1	AP2M1-206	protein_coding
7.2	-1	0.48	-2.1	0.036	NA	AD	iso	ENST00000476434.1_1	AP2M1	AP2M1-217	protein_coding
31	-0.79	0.4	-2	0.049	NA	AD	iso	ENST00000468892.5_1	ABCF3	ABCF3-207	protein_coding
21	-0.6	0.25	-2.4	0.017	NA	AD	iso	ENST00000594792.5_5	U2AF1L4	U2AF1L4-219	protein_coding
16	-0.48	0.22	-2.2	0.027	NA	AD	iso	ENST00000578354.5_1	SAP30BP	SAP30BP-206	protein_coding
63	0.38	0.18	2.1	0.035	NA	AD	iso	ENST00000586778.1_2	SRSF2	SRSF2-209	protein_coding
20	-0.59	0.26	-2.2	0.025	NA	AD	iso	ENST00000584054.5_1	EIF4A1	EIF4A1-231	protein_coding
520	-0.54	0.24	-2.2	0.026	0.18	AD	iso	ENST00000567868.5_2	SPSB3	SPSB3-209	protein_coding
110	-0.39	0.17	-2.2	0.027	NA	AD	iso	ENST00000397066.9_2	CCNF	CCNF-202	protein_coding
24	0.99	0.33	3	0.003	NA	AD	iso	ENST00000524762.5_2	UBXN1	UBXN1-204	protein_coding
17	0.77	0.3	2.5	0.012	NA	AD	iso	ENST00000526163.5_2	NXF1	NXF1-203	protein_coding
55	-0.51	0.26	-2	0.046	NA	AD	iso	ENST00000489919.1_2	PDZK1IP1	PDZK1IP1-203	protein_coding
89	0.65	0.32	2	0.042	NA	AD	iso	ENST00000371146.5_1	USP1	USP1-202	protein_coding
320	0.48	0.19	2.5	0.013	0.14	AD	iso	ENST00000463660.1_2	GBP2	GBP2-202	protein_coding
77	0.57	0.23	2.5	0.012	NA	AD	iso	ENST00000341491.9_3	ATF3	ATF3-202	protein_coding
230	0.45	0.18	2.5	0.012	NA	AD	iso	ENST00000539697.5_1	BROX	BROX-208	protein_coding
1900	0.51	0.18	2.8	0.0051	0.11	AD	iso	ENST00000655399.1_1	H3-3A	H3-3A-206	protein_coding
1000	0.38	0.15	2.6	0.0093	0.13	AD	iso	ENST00000309534.10_2	CGGBP1	CGGBP1-201	protein_coding
200	0.63	0.29	2.2	0.031	NA	AD	iso	ENST00000368176.8_3	FCRL1	FCRL1-203	protein_coding
260	0.59	0.17	3.4	0.00061	NA	AD	iso	ENST00000368130.9_4	AIM2	AIM2-202	protein_coding
40	0.53	0.25	2.1	0.037	NA	AD	iso	ENST00000474311.1_2	NEPRO	NEPRO-215	protein_coding
190	0.92	0.3	3.1	0.0023	NA	AD	iso	ENST00000471247.5_2	CCNL1	CCNL1-214	protein_coding
120	0.46	0.17	2.7	0.0067	NA	AD	iso	ENST00000417128.6_2	SLMAP	SLMAP-205	protein_coding
58	-0.53	0.25	-2.2	0.031	NA	AD	iso	ENST00000373073.8_2	MEAF6	MEAF6-202	protein_coding
28	0.59	0.24	2.5	0.014	NA	AD	iso	ENST00000495462.5_2	RPN1	RPN1-206	protein_coding
920	0.39	0.18	2.1	0.034	0.2	AD	iso	ENST00000443308.6_3	SHISA5	SHISA5-209	protein_coding
57	-0.47	0.16	-2.9	0.0033	NA	AD	iso	ENST00000480772.1_1	APEH	APEH-213	protein_coding
32	0.46	0.23	2	0.041	NA	AD	iso	ENST00000611882.1_1	ABHD18	ABHD18-206	protein_coding
400	0.46	0.16	2.8	0.0048	0.11	AD	iso	ENST00000438704.6_2	HMGB2	HMGB2-202	protein_coding
640	0.5	0.24	2.1	0.037	0.21	AD	iso	ENST00000652901.1_1	NIPBL	NIPBL-209	protein_coding
240	0.38	0.18	2.1	0.035	NA	AD	iso	ENST00000355943.8_3	SLC25A46	SLC25A46-201	protein_coding
19	0.4	0.15	2.8	0.0057	NA	AD	iso	ENST00000514178.5_2	PGGT1B	PGGT1B-205	protein_coding
1600	0.42	0.19	2.3	0.023	0.18	AD	iso	ENST00000357387.8_4	RICTOR	RICTOR-202	protein_coding
440	0.38	0.15	2.6	0.0096	0.13	AD	iso	ENST00000453514.5_1	TENT2	TENT2-204	protein_coding
57	0.38	0.19	2	0.049	NA	AD	iso	ENST00000509005.5_3	UTP15	UTP15-204	protein_coding
43	-0.49	0.24	-2.1	0.039	NA	AD	iso	ENST00000526886.5_2	SAMD3	SAMD3-208	protein_coding
35	-0.48	0.2	-2.4	0.018	NA	AD	iso	ENST00000532309.5_2	SAMD3	SAMD3-213	protein_coding
34	0.41	0.14	3.1	0.0023	NA	AD	iso	ENST00000490942.1_2	TRA2A	TRA2A-208	protein_coding
290	0.66	0.33	2	0.048	0.23	AD	iso	ENST00000647849.1_2	OSGIN2	OSGIN2-204	protein_coding
22	-0.42	0.18	-2.4	0.018	NA	AD	iso	ENST00000481403.1_1	GPR146	GPR146-205	protein_coding
60	-0.48	0.25	-2	0.049	NA	AD	iso	ENST00000493446.1_2	INTS1	INTS1-206	protein_coding
650	0.43	0.19	2.3	0.022	0.17	AD	iso	ENST00000380733.9_3	PSIP1	PSIP1-203	protein_coding
60	0.39	0.16	2.4	0.017	NA	AD	iso	ENST00000483135.1_2	HNRNPK	HNRNPK-209	protein_coding
69	0.4	0.14	2.8	0.0046	NA	AD	iso	ENST00000492865.1_2	HNRNPK	HNRNPK-210	protein_coding
27	-0.38	0.15	-2.6	0.009	NA	AD	iso	ENST00000460899.5_2	COMTD1	COMTD1-202	protein_coding
9.2	-0.44	0.18	-2.5	0.014	NA	AD	iso	ENST00000491270.1_2	COMTD1	COMTD1-206	protein_coding
51	1.2	0.57	2	0.041	NA	AD	iso	ENST00000621160.4_2	IFI27	IFI27-215	protein_coding
240	0.39	0.16	2.4	0.016	NA	AD	iso	ENST00000377275.4_2	ARL5B	ARL5B-201	protein_coding
120	0.66	0.25	2.7	0.0072	NA	AD	iso	ENST00000299259.10_3	COPS2	COPS2-201	protein_coding
11	0.6	0.29	2	0.041	NA	AD	iso	ENST00000564062.1_3	ARIH1	ARIH1-206	protein_coding
97	0.52	0.24	2.1	0.033	NA	AD	iso	ENST00000299367.10_2	C2	C2-201	protein_coding
86	-0.42	0.16	-2.7	0.0062	NA	AD	iso	ENST00000526280.1_1	SMPD1	SMPD1-202	protein_coding
47	-0.91	0.42	-2.2	0.031	NA	AD	iso	ENST00000524626.5_2	APBB1	APBB1-204	protein_coding
92	0.91	0.26	3.5	0.00045	NA	AD	iso	ENST00000643342.1_2	TPP1	TPP1-217	protein_coding
140	0.63	0.26	2.4	0.016	NA	AD	iso	ENST00000647209.1_2	TPP1	TPP1-235	protein_coding
150	0.5	0.18	2.7	0.0071	NA	AD	iso	ENST00000299665.3_2	CLEC4D	CLEC4D-201	protein_coding
260	1.9	0.49	3.9	8.2e-05	NA	AD	iso	ENST00000557901.5_1	B2M	B2M-203	protein_coding
5200	0.69	0.21	3.3	0.00098	0.087	AD	iso	ENST00000559220.1_1	B2M	B2M-204	protein_coding
890	0.52	0.21	2.5	0.012	0.14	AD	iso	ENST00000560681.1_1	B2M	B2M-209	protein_coding
2700	0.44	0.17	2.5	0.011	0.14	AD	iso	ENST00000561139.1_1	B2M	B2M-210	protein_coding
690	0.41	0.13	3.1	0.0021	0.098	AD	iso	ENST00000648006.2_2	B2M	B2M-214	protein_coding
400	0.56	0.26	2.2	0.031	0.19	AD	iso	ENST00000358246.5_2	MS4A7	MS4A7-202	protein_coding
180	-0.42	0.14	-3	0.0026	NA	AD	iso	ENST00000488285.1_1	TTC16	TTC16-202	protein_coding
340	0.39	0.13	3	0.0029	0.1	AD	iso	ENST00000646677.1_1	NOD2	NOD2-212	protein_coding
11	0.44	0.18	2.4	0.016	NA	AD	iso	ENST00000590899.5_1	RAB8A	RAB8A-206	protein_coding
11	-0.47	0.2	-2.3	0.022	NA	AD	iso	ENST00000562981.1_2	MVD	MVD-205	protein_coding
190	-0.69	0.29	-2.4	0.019	NA	AD	iso	ENST00000491523.5_1	RPL13	RPL13-209	protein_coding
130	0.45	0.17	2.7	0.0067	NA	AD	iso	ENST00000391785.7_1	ZNF701	ZNF701-202	protein_coding
12	-0.75	0.28	-2.7	0.0073	NA	AD	iso	ENST00000420483.5_2	LAIR1	LAIR1-206	protein_coding
12	-0.54	0.22	-2.5	0.014	NA	AD	iso	ENST00000438193.1_3	LAIR1	LAIR1-211	protein_coding
38	-0.42	0.17	-2.5	0.014	NA	AD	iso	ENST00000498511.5_2	LAIR1	LAIR1-221	protein_coding
79	-0.86	0.29	-2.9	0.0033	NA	AD	iso	ENST00000301202.7_2	LAIR2	LAIR2-201	protein_coding
58	-1	0.32	-3.2	0.0016	NA	AD	iso	ENST00000351841.2_1	LAIR2	LAIR2-202	protein_coding
45	-0.46	0.21	-2.2	0.027	NA	AD	iso	ENST00000301242.9_3	PPP1R14A	PPP1R14A-201	protein_coding
50	1.5	0.44	3.5	0.00049	NA	AD	iso	ENST00000598436.1_2	EEF2	EEF2-205	protein_coding
81	-0.45	0.22	-2.1	0.04	NA	AD	iso	ENST00000301272.6_2	TMIGD2	TMIGD2-201	protein_coding
50	-0.4	0.14	-2.8	0.0054	NA	AD	iso	ENST00000531425.5_1	KIFC2	KIFC2-205	protein_coding
250	-0.41	0.12	-3.5	0.00054	NA	AD	iso	ENST00000645548.1_1	KIFC2	KIFC2-209	protein_coding
19	-0.92	0.35	-2.7	0.0078	NA	AD	iso	ENST00000575411.2_1	CYB5D2	CYB5D2-204	protein_coding
10	-0.81	0.29	-2.8	0.0051	NA	AD	iso	ENST00000591003.1_1	TMC8	TMC8-206	protein_coding
70	-0.38	0.19	-2	0.049	NA	AD	iso	ENST00000301634.12_3	TK1	TK1-201	protein_coding
7.8	-0.89	0.28	-3.2	0.0015	NA	AD	iso	ENST00000573451.5_1	SRRM2	SRRM2-214	protein_coding
590	0.42	0.17	2.5	0.014	0.14	AD	iso	ENST00000534719.1_2	FTH1	FTH1-211	protein_coding
170	-0.39	0.15	-2.6	0.0097	NA	AD	iso	ENST00000530785.5_2	LTBP3	LTBP3-217	protein_coding
620	0.38	0.15	2.6	0.009	0.13	AD	iso	ENST00000522514.6_3	PCMTD1	PCMTD1-207	protein_coding
29	-0.54	0.24	-2.3	0.024	NA	AD	iso	ENST00000412814.1_3	CX3CR1	CX3CR1-203	protein_coding
15	0.44	0.2	2.1	0.032	NA	AD	iso	ENST00000475474.5_1	SEPTIN2	SEPTIN2-234	protein_coding
41	0.41	0.19	2.2	0.029	NA	AD	iso	ENST00000503754.5_1	RHOH	RHOH-202	protein_coding
27	-0.84	0.43	-2	0.05	NA	AD	iso	ENST00000565845.5_3	ATXN2L	ATXN2L-217	protein_coding
29	-0.4	0.2	-2	0.041	NA	AD	iso	ENST00000518039.1_1	POLR3D	POLR3D-204	protein_coding
9.5	2	0.88	2.3	0.02	NA	AD	iso	ENST00000528400.1_1	FNTA	FNTA-207	protein_coding
63	-0.41	0.2	-2.1	0.039	NA	AD	iso	ENST00000505093.1_1	IL7R	IL7R-202	protein_coding
1000	0.39	0.16	2.4	0.017	0.16	AD	iso	ENST00000481514.5_1	LGALS9	LGALS9-206	protein_coding
62	0.47	0.19	2.4	0.015	NA	AD	iso	ENST00000523432.5_1	UBE2V2	UBE2V2-208	protein_coding
33	-0.39	0.18	-2.2	0.027	NA	AD	iso	ENST00000502731.5_1	RGS14	RGS14-203	protein_coding
410	0.54	0.13	4.1	4.6e-05	0.045	AD	iso	ENST00000374379.9_2	CLIC4	CLIC4-201	protein_coding
13	-0.65	0.24	-2.7	0.0072	NA	AD	iso	ENST00000580235.5_3	HEXD	HEXD-208	protein_coding
130	1.1	0.45	2.5	0.013	NA	AD	iso	ENST00000354321.11_2	DUS1L	DUS1L-202	protein_coding
25	-1.2	0.49	-2.4	0.014	NA	AD	iso	ENST00000578907.5_2	DUS1L	DUS1L-211	protein_coding
370	0.56	0.27	2.1	0.04	0.21	AD	iso	ENST00000613823.1_1	UGP2	UGP2-229	protein_coding
150	-0.39	0.11	-3.5	0.00048	NA	AD	iso	ENST00000301061.9_4	WNT10B	WNT10B-201	protein_coding
520	-0.42	0.16	-2.5	0.011	0.14	AD	iso	ENST00000470531.5_3	CHD3	CHD3-208	protein_coding
120	0.57	0.28	2	0.045	NA	AD	iso	ENST00000613578.4_2	TMEM154	TMEM154-204	protein_coding
330	0.43	0.14	3	0.0023	0.098	AD	iso	ENST00000424381.5_1	UBE2E1	UBE2E1-203	protein_coding
25	0.4	0.18	2.2	0.025	NA	AD	iso	ENST00000557156.1_2	STAT2	STAT2-208	protein_coding
150	0.49	0.18	2.7	0.0064	NA	AD	iso	ENST00000652741.1_2	STAT2	STAT2-224	protein_coding
110	0.46	0.17	2.7	0.0066	NA	AD	iso	ENST00000558644.2_1	AKAP13	AKAP13-208	protein_coding
22	0.49	0.19	2.6	0.0084	NA	AD	iso	ENST00000559486.2_1	AKAP13	AKAP13-213	protein_coding
200	0.45	0.13	3.4	0.00062	NA	AD	iso	ENST00000392995.7_1	PPM1D	PPM1D-202	protein_coding
49	-0.55	0.23	-2.4	0.016	NA	AD	iso	ENST00000484121.5_2	RPS9	RPS9-211	protein_coding
22	-0.87	0.44	-2	0.049	NA	AD	iso	ENST00000482023.5_2	ZNF692	ZNF692-213	protein_coding
25	-0.82	0.34	-2.4	0.015	NA	AD	iso	ENST00000623153.1_1	RHNO1	RHNO1-210	protein_coding
85	0.5	0.19	2.6	0.0086	NA	AD	iso	ENST00000307767.13_3	TVP23B	TVP23B-201	protein_coding
22	-0.49	0.22	-2.2	0.026	NA	AD	iso	ENST00000494984.5_2	QARS1	QARS1-223	protein_coding
32	-0.4	0.16	-2.6	0.0092	NA	AD	iso	ENST00000581284.5_4	ORMDL3	ORMDL3-205	protein_coding
36	1.7	0.61	2.8	0.005	NA	AD	iso	ENST00000409409.5_3	CYCS	CYCS-202	protein_coding
92	-0.56	0.25	-2.2	0.026	NA	AD	iso	ENST00000331469.6_4	CD8B	CD8B-201	protein_coding
270	0.46	0.19	2.4	0.017	NA	AD	iso	ENST00000392687.4_2	CERS6	CERS6-202	protein_coding
13	-1.6	0.56	-2.8	0.0045	NA	AD	iso	ENST00000535813.5_2	TMEM134	TMEM134-207	protein_coding
65	0.61	0.23	2.7	0.0073	NA	AD	iso	ENST00000562324.5_3	PSME3IP1	PSME3IP1-203	protein_coding
250	-1	0.47	-2.1	0.036	NA	AD	iso	ENST00000488977.1_1	RAB37	RAB37-210	protein_coding
1600	0.38	0.13	2.9	0.0042	0.11	AD	iso	ENST00000389063.3_2	DCP2	DCP2-201	protein_coding
330	1.2	0.55	2.2	0.029	0.19	AD	iso	ENST00000416195.1_3	SP3	SP3-202	protein_coding
290	0.65	0.23	2.8	0.0049	0.11	AD	iso	ENST00000311085.8_3	DMXL1	DMXL1-201	protein_coding
18	-0.8	0.31	-2.6	0.011	NA	AD	iso	ENST00000549141.1_2	HECTD4	HECTD4-209	protein_coding
4800	0.44	0.16	2.7	0.0064	0.12	AD	iso	ENST00000474629.7_2	PARP14	PARP14-202	protein_coding
220	0.61	0.29	2.1	0.036	NA	AD	iso	ENST00000474669.1_1	PARP14	PARP14-203	protein_coding
270	0.85	0.22	3.9	0.0001	NA	AD	iso	ENST00000307834.9_1	NABP1	NABP1-201	protein_coding
23	0.87	0.26	3.4	0.0007	NA	AD	iso	ENST00000462824.1_1	NABP1	NABP1-209	protein_coding
11	0.55	0.2	2.8	0.0051	NA	AD	iso	ENST00000630016.1_3	CHD2	CHD2-219	protein_coding
72	0.88	0.34	2.6	0.011	NA	AD	iso	ENST00000409315.5_1	AGFG1	AGFG1-204	protein_coding
33	-0.38	0.17	-2.2	0.025	NA	AD	iso	ENST00000578509.1_2	CD7	CD7-202	protein_coding
13	0.46	0.12	3.8	0.00016	NA	AD	iso	ENST00000586699.1_3	EIF1	EIF1-206	protein_coding
2200	0.38	0.14	2.7	0.0077	0.13	AD	iso	ENST00000411702.7_1	RNF213	RNF213-202	protein_coding
29	0.44	0.17	2.5	0.013	NA	AD	iso	ENST00000559603.1_1	RNF213	RNF213-208	protein_coding
8.8	0.45	0.22	2.1	0.037	NA	AD	iso	ENST00000572622.1_1	RNF213	RNF213-214	protein_coding
200	0.43	0.14	3.2	0.0016	NA	AD	iso	ENST00000355897.10_2	GPR160	GPR160-201	protein_coding
420	0.52	0.14	3.7	0.00018	0.069	AD	iso	ENST00000543763.1_1	RESF1	RESF1-208	protein_coding
66	0.4	0.2	2	0.046	NA	AD	iso	ENST00000534824.5_4	RIN1	RIN1-207	protein_coding
36	0.44	0.22	2	0.041	NA	AD	iso	ENST00000421484.5_2	PARL	PARL-205	protein_coding
39	-0.39	0.18	-2.1	0.034	NA	AD	iso	ENST00000506045.1_4	PHYKPL	PHYKPL-214	protein_coding
51	-0.43	0.15	-2.8	0.0052	NA	AD	iso	ENST00000510991.5_2	PHYKPL	PHYKPL-216	protein_coding
140	0.53	0.24	2.2	0.026	NA	AD	iso	ENST00000409657.5_3	CCDC14	CCDC14-202	protein_coding
86	0.38	0.16	2.3	0.02	NA	AD	iso	ENST00000508509.5_5	MCTP1	MCTP1-209	protein_coding
10	-0.62	0.26	-2.4	0.015	NA	AD	iso	ENST00000545562.2_2	UCP2	UCP2-210	protein_coding
600	0.45	0.17	2.6	0.0084	0.13	AD	iso	ENST00000318469.2_1	GAPT	GAPT-201	protein_coding
82	0.42	0.17	2.5	0.012	NA	AD	iso	ENST00000502276.5_2	GAPT	GAPT-203	protein_coding
500	0.42	0.13	3.1	0.0018	0.094	AD	iso	ENST00000315367.4_2	PLEKHF2	PLEKHF2-201	protein_coding
280	0.4	0.17	2.4	0.018	0.16	AD	iso	ENST00000315948.11_3	LYSMD3	LYSMD3-201	protein_coding
390	-1	0.27	-3.9	0.0001	0.068	AD	iso	ENST00000349618.7_2	ZNF683	ZNF683-201	protein_coding
56	-1.2	0.33	-3.5	0.00039	NA	AD	iso	ENST00000403843.5_2	ZNF683	ZNF683-202	protein_coding
91	-1.1	0.3	-3.8	0.00015	NA	AD	iso	ENST00000451801.5_2	ZNF683	ZNF683-206	protein_coding
12	-1.2	0.33	-3.5	0.00045	NA	AD	iso	ENST00000454975.1_2	ZNF683	ZNF683-208	protein_coding
16	0.46	0.19	2.3	0.019	NA	AD	iso	ENST00000436661.5_4	ZBTB8OS	ZBTB8OS-204	protein_coding
170	0.4	0.17	2.3	0.021	NA	AD	iso	ENST00000326505.4_2	B3GNT5	B3GNT5-201	protein_coding
34	0.53	0.17	3.1	0.0019	NA	AD	iso	ENST00000517710.5_2	RMDN1	RMDN1-204	protein_coding
3100	0.49	0.18	2.7	0.0063	0.12	AD	iso	ENST00000318238.9_3	SAMD9L	SAMD9L-201	protein_coding
1100	0.55	0.2	2.8	0.0056	0.12	AD	iso	ENST00000411955.5_2	SAMD9L	SAMD9L-202	protein_coding
650	0.47	0.2	2.3	0.019	0.16	AD	iso	ENST00000673974.1_1	TBL1XR1	TBL1XR1-236	protein_coding
1200	0.38	0.13	3	0.0025	0.098	AD	iso	ENST00000432237.2_2	CD163	CD163-203	protein_coding
18	0.56	0.25	2.2	0.027	NA	AD	iso	ENST00000582392.2_2	C18orf32	C18orf32-202	protein_coding
11	-0.54	0.24	-2.2	0.026	NA	AD	iso	ENST00000532004.5_1	RPLP2	RPLP2-208	protein_coding
18	0.57	0.28	2	0.043	NA	AD	iso	ENST00000493722.1_2	THAP5	THAP5-208	protein_coding
36	-1.5	0.68	-2.2	0.03	NA	AD	iso	ENST00000581858.5_3	FLII	FLII-227	protein_coding
31	0.71	0.23	3.1	0.0022	NA	AD	iso	ENST00000578961.5_2	GRB2	GRB2-208	protein_coding
15	-0.8	0.29	-2.8	0.005	NA	AD	iso	ENST00000455875.5_1	ARL6IP6	ARL6IP6-203	protein_coding
18	-0.43	0.18	-2.4	0.015	NA	AD	iso	ENST00000539528.5_3	ASB8	ASB8-211	protein_coding
130	0.64	0.24	2.6	0.0085	NA	AD	iso	ENST00000403326.5_2	ODF3B	ODF3B-203	protein_coding
1.4	-1.1	0.54	-2.1	0.034	NA	AD	iso	ENST00000627177.1_1	WDR6	WDR6-223	protein_coding
26	0.4	0.13	3	0.0028	NA	AD	iso	ENST00000314401.3_2	CD300LB	CD300LB-201	protein_coding
180	-0.61	0.31	-2	0.046	NA	AD	iso	ENST00000326277.5_2	SNX18	SNX18-201	protein_coding
40	0.48	0.24	2	0.047	NA	AD	iso	ENST00000563536.1_2	EXOC3L1	EXOC3L1-204	protein_coding
11	-0.47	0.24	-2	0.045	NA	AD	iso	ENST00000341298.3_2	DPM3	DPM3-201	protein_coding
25	-0.47	0.14	-3.4	0.00064	NA	AD	iso	ENST00000532536.5_2	SHARPIN	SHARPIN-206	protein_coding
330	-0.53	0.14	-3.7	0.00026	0.069	AD	iso	ENST00000589190.1_2	TMEM86B	TMEM86B-203	protein_coding
99	0.46	0.16	2.8	0.0045	NA	AD	iso	ENST00000487290.5_2	HCLS1	HCLS1-208	protein_coding
360	0.44	0.17	2.6	0.0083	0.13	AD	iso	ENST00000495491.5_2	HCLS1	HCLS1-211	protein_coding
630	0.44	0.16	2.8	0.0049	0.11	AD	iso	ENST00000336126.6_2	PCGF5	PCGF5-201	protein_coding
190	-0.41	0.15	-2.7	0.0066	NA	AD	iso	ENST00000317378.5_1	TRAPPC5	TRAPPC5-201	protein_coding
130	-0.45	0.18	-2.5	0.011	NA	AD	iso	ENST00000339348.9_1	FCRL6	FCRL6-202	protein_coding
840	0.49	0.19	2.6	0.0098	0.13	AD	iso	ENST00000510590.1_2	DDX60L	DDX60L-208	protein_coding
2800	0.46	0.17	2.7	0.0078	0.13	AD	iso	ENST00000511577.5_2	DDX60L	DDX60L-209	protein_coding
78	0.39	0.18	2.2	0.028	NA	AD	iso	ENST00000515088.5_2	DDX60L	DDX60L-216	protein_coding
28	0.47	0.24	2	0.05	NA	AD	iso	ENST00000367208.1_1	SNRPE	SNRPE-201	protein_coding
38	-0.44	0.16	-2.8	0.0051	NA	AD	iso	ENST00000494212.1_2	UBA7	UBA7-210	protein_coding
110	-0.45	0.15	-3	0.0031	NA	AD	iso	ENST00000536073.1_1	ARL6IP4	ARL6IP4-213	protein_coding
14	-0.6	0.25	-2.4	0.018	NA	AD	iso	ENST00000377531.3	FAM27A	FAM27A-001	protein_coding
140	0.4	0.14	2.9	0.0034	NA	AD	iso	ENST00000326397.10_3	RWDD4	RWDD4-201	protein_coding
150	-0.45	0.15	-3	0.0024	NA	AD	iso	ENST00000538259.2_1	CRIP2	CRIP2-203	protein_coding
98	-0.43	0.16	-2.6	0.009	NA	AD	iso	ENST00000483629.5_1	EWSR1	EWSR1-218	protein_coding
24	-0.39	0.16	-2.5	0.013	NA	AD	iso	ENST00000490198.5_1	MTA1	MTA1-213	protein_coding
430	0.43	0.17	2.5	0.012	0.14	AD	iso	ENST00000370554.5_2	SELENOF	SELENOF-202	protein_coding
65	0.56	0.24	2.3	0.02	NA	AD	iso	ENST00000496774.5_1	MX2	MX2-213	protein_coding
240	0.71	0.29	2.5	0.014	NA	AD	iso	ENST00000413025.5_2	ZNF438	ZNF438-204	protein_coding
110	-0.44	0.21	-2.1	0.039	NA	AD	iso	ENST00000332822.6_3	NOG	NOG-201	protein_coding
9.8	0.6	0.21	2.8	0.0052	NA	AD	iso	ENST00000339418.9_2	NUDT14	NUDT14-201	protein_coding
23	0.48	0.18	2.6	0.0097	NA	AD	iso	ENST00000333610.4_3	TTC32	TTC32-201	protein_coding
150	0.4	0.2	2	0.047	NA	AD	iso	ENST00000568426.1_1	EIF3C	EIF3C-212	protein_coding
12	-0.41	0.18	-2.2	0.025	NA	AD	iso	ENST00000569005.5_1	EIF3C	EIF3C-213	protein_coding
62	0.42	0.19	2.2	0.025	NA	AD	iso	ENST00000418939.1_3	PPP1R2	PPP1R2-202	protein_coding
16	-0.5	0.2	-2.5	0.013	NA	AD	iso	ENST00000517857.1_2	TOP1MT	TOP1MT-203	protein_coding
130	-0.48	0.12	-3.9	9.1e-05	NA	AD	iso	ENST00000331588.4_2	DUSP8	DUSP8-201	protein_coding
11	-0.84	0.36	-2.3	0.021	NA	AD	iso	ENST00000502825.1_2	STING1	STING1-203	protein_coding
110	0.58	0.24	2.4	0.015	NA	AD	iso	ENST00000585930.5_1	SEPTIN9	SEPTIN9-211	protein_coding
74	-0.9	0.27	-3.3	0.00086	NA	AD	iso	ENST00000392554.7_1	BTBD6	BTBD6-203	protein_coding
210	0.66	0.28	2.3	0.02	NA	AD	iso	ENST00000215794.8_2	USP18	USP18-201	protein_coding
90	-0.39	0.13	-3	0.0028	NA	AD	iso	ENST00000400780.8_1	HSF1	HSF1-201	protein_coding
88	-0.53	0.14	-3.7	0.00023	NA	AD	iso	ENST00000527328.5_1	HSF1	HSF1-202	protein_coding
18	-0.45	0.22	-2	0.044	NA	AD	iso	ENST00000546058.1_2	DDX51	DDX51-206	protein_coding
49	-0.55	0.24	-2.3	0.022	NA	AD	iso	ENST00000332725.7_2	SIGIRR	SIGIRR-201	protein_coding
140	-0.55	0.15	-3.7	0.00021	NA	AD	iso	ENST00000534217.5_2	SIGIRR	SIGIRR-222	protein_coding
8.9	-0.41	0.19	-2.1	0.035	NA	AD	iso	ENST00000572531.1_1	CCDC137	CCDC137-203	protein_coding
15	-0.55	0.18	-3	0.003	NA	AD	iso	ENST00000577012.1_1	HGS	HGS-217	protein_coding
170	0.42	0.2	2.1	0.036	NA	AD	iso	ENST00000397570.5_2	IRF7	IRF7-204	protein_coding
69	0.42	0.17	2.5	0.011	NA	AD	iso	ENST00000525750.1_2	IRF7	IRF7-207	protein_coding
21	-0.4	0.16	-2.5	0.012	NA	AD	iso	ENST00000467086.5_2	P4HB	P4HB-205	protein_coding
17	0.67	0.26	2.6	0.0098	NA	AD	iso	ENST00000543654.1_3	NPIPB4	NPIPB4-218	protein_coding
560	0.5	0.16	3.1	0.0019	0.095	AD	iso	ENST00000300870.15_2	ZNF267	ZNF267-201	protein_coding
210	0.58	0.19	3.1	0.0023	NA	AD	iso	ENST00000334529.10_3	BTLA	BTLA-201	protein_coding
9.1	-1.9	0.87	-2.2	0.031	NA	AD	iso	ENST00000353758.8_1	FCAR	FCAR-202	protein_coding
150	-0.41	0.2	-2	0.043	NA	AD	iso	ENST00000554736.5_1	GNG2	GNG2-205	protein_coding
74	-0.38	0.16	-2.4	0.017	NA	AD	iso	ENST00000476756.1_1	INSIG1	INSIG1-206	protein_coding
45	-0.54	0.25	-2.1	0.033	NA	AD	iso	ENST00000413013.6_3	SMIM29	SMIM29-202	protein_coding
150	-0.49	0.19	-2.6	0.01	NA	AD	iso	ENST00000624862.3_3	PRR5	PRR5-218	protein_coding
44	-0.47	0.22	-2.1	0.033	NA	AD	iso	ENST00000475025.5_1	BCR	BCR-210	protein_coding
99	-0.46	0.15	-3.2	0.0014	NA	AD	iso	ENST00000379268.7_5	TNFRSF18	TNFRSF18-203	protein_coding
20	-0.5	0.21	-2.4	0.016	NA	AD	iso	ENST00000486728.5_2	TNFRSF18	TNFRSF18-204	protein_coding
420	0.49	0.18	2.7	0.0075	0.12	AD	iso	ENST00000261182.12_3	NAP1L1	NAP1L1-201	protein_coding
95	0.67	0.17	4	7.3e-05	NA	AD	iso	ENST00000431879.7_2	NAP1L1	NAP1L1-203	protein_coding
59	0.43	0.2	2.1	0.033	NA	AD	iso	ENST00000392903.3_6	SHTN1	SHTN1-204	protein_coding
330	0.43	0.14	3	0.0024	0.098	AD	iso	ENST00000497044.5_3	SHTN1	SHTN1-206	protein_coding
330	0.48	0.22	2.2	0.031	0.2	AD	iso	ENST00000642603.2_4	TLR5	TLR5-206	protein_coding
43	-0.4	0.2	-2	0.041	NA	AD	iso	ENST00000553173.5_2	MCRS1	MCRS1-216	protein_coding
55	-0.42	0.16	-2.6	0.0084	NA	AD	iso	ENST00000575434.4_2	PLSCR3	PLSCR3-209	protein_coding
32	-0.43	0.13	-3.3	0.001	NA	AD	iso	ENST00000466300.1_1	KLHL17	KLHL17-203	protein_coding
14	-0.49	0.2	-2.4	0.017	NA	AD	iso	ENST00000464152.1_1	TPRG1	TPRG1-207	protein_coding
34	0.67	0.28	2.4	0.015	NA	AD	iso	ENST00000304952.10_3	HES4	HES4-201	protein_coding
46	0.87	0.29	3	0.0024	NA	AD	iso	ENST00000481869.1_2	HES4	HES4-203	protein_coding
140	0.49	0.22	2.2	0.026	NA	AD	iso	ENST00000342435.9_3	PLSCR1	PLSCR1-201	protein_coding
400	0.46	0.16	2.9	0.004	0.11	AD	iso	ENST00000448787.6_4	PLSCR1	PLSCR1-202	protein_coding
180	0.49	0.22	2.2	0.03	NA	AD	iso	ENST00000462666.5_2	PLSCR1	PLSCR1-203	protein_coding
21	0.52	0.2	2.6	0.0092	NA	AD	iso	ENST00000483300.5_2	PLSCR1	PLSCR1-211	protein_coding
18	0.72	0.25	3	0.0031	NA	AD	iso	ENST00000484560.1_2	PLSCR1	PLSCR1-212	protein_coding
410	0.52	0.18	2.9	0.0032	0.1	AD	iso	ENST00000494568.5_2	PLSCR1	PLSCR1-219	protein_coding
160	0.4	0.19	2.2	0.031	NA	AD	iso	ENST00000453840.7_3	SRSF10	SRSF10-207	protein_coding
840	-0.44	0.2	-2.2	0.029	0.19	AD	iso	ENST00000484216.1_2	HBA2	HBA2-204	protein_coding
350	0.53	0.2	2.6	0.009	0.13	AD	iso	ENST00000377200.9_2	PTAR1	PTAR1-202	protein_coding
28	-0.4	0.15	-2.6	0.0092	NA	AD	iso	ENST00000484541.5_2	UROS	UROS-210	protein_coding
23	0.76	0.38	2	0.045	NA	AD	iso	ENST00000495224.1_2	RBM34	RBM34-210	protein_coding
370	0.41	0.14	2.8	0.0047	0.11	AD	iso	ENST00000369577.8_2	ZNF292	ZNF292-202	protein_coding
3.7	-0.66	0.3	-2.2	0.028	NA	AD	iso	ENST00000486865.1_2	TMEM120A	TMEM120A-212	protein_coding
59	0.44	0.16	2.8	0.0058	NA	AD	iso	ENST00000490656.5_4	TMEM120A	TMEM120A-213	protein_coding
820	0.56	0.24	2.4	0.018	0.16	AD	iso	ENST00000339872.8_2	HMGB1	HMGB1-202	protein_coding
600	0.41	0.18	2.3	0.022	0.17	AD	iso	ENST00000072516.7_2	IL1RAP	IL1RAP-201	protein_coding
140	0.63	0.22	2.8	0.0049	NA	AD	iso	ENST00000360760.9_2	SPATS2L	SPATS2L-202	protein_coding
230	0.43	0.19	2.2	0.025	NA	AD	iso	ENST00000344930.7_1	ZNF107	ZNF107-201	protein_coding
18	-0.38	0.17	-2.2	0.025	NA	AD	iso	ENST00000555606.5_1	EVL	EVL-215	protein_coding
200	0.38	0.12	3.3	0.00088	NA	AD	iso	ENST00000450008.2_3	ANAPC7	ANAPC7-201	protein_coding
230	-0.5	0.24	-2	0.042	NA	AD	iso	ENST00000497920.1_1	ARID5A	ARID5A-206	protein_coding
43	0.67	0.25	2.6	0.0085	NA	AD	iso	ENST00000616550.4_1	CBWD3	CBWD3-212	protein_coding
16	0.47	0.21	2.3	0.024	NA	AD	iso	ENST00000393546.8_2	PDLIM7	PDLIM7-204	protein_coding
130	0.44	0.15	2.9	0.004	NA	AD	iso	ENST00000357901.5_2	ZNF441	ZNF441-201	protein_coding
280	0.47	0.19	2.5	0.011	NA	AD	iso	ENST00000358056.8_3	GMFB	GMFB-201	protein_coding
95	0.46	0.15	3	0.0024	NA	AD	iso	ENST00000358987.8_2	ZNF763	ZNF763-202	protein_coding
310	-0.41	0.18	-2.2	0.025	0.18	AD	iso	ENST00000401395.1_1	KIAA1671	KIAA1671-202	protein_coding
9.3	-0.63	0.19	-3.3	0.0009	NA	AD	iso	ENST00000431125.1_1	ZGPAT	ZGPAT-205	protein_coding
11	-0.92	0.26	-3.6	0.00037	NA	AD	iso	ENST00000522180.5_2	TBC1D9B	TBC1D9B-215	protein_coding
150	-0.63	0.24	-2.6	0.009	NA	AD	iso	ENST00000394465.2	CCL4L2	CCL4L2-001	protein_coding
49	-0.52	0.18	-2.8	0.005	NA	AD	iso	ENST00000483015.1_3	MIB2	MIB2-211	protein_coding
24	-0.45	0.2	-2.2	0.028	NA	AD	iso	ENST00000370940.6_4	HHLA3	HHLA3-203	protein_coding
54	-0.6	0.3	-2	0.042	NA	AD	iso	ENST00000630147.1_1	SPTAN1	SPTAN1-220	protein_coding
15	-0.55	0.28	-2	0.048	NA	AD	iso	ENST00000631121.1_1	SPTAN1	SPTAN1-225	protein_coding
44	-0.62	0.27	-2.3	0.022	NA	AD	iso	ENST00000637434.1_1	SPTAN1	SPTAN1-235	protein_coding
82	0.64	0.28	2.3	0.022	NA	AD	iso	ENST00000359429.11_2	RPE	RPE-202	protein_coding
52	0.4	0.13	3.1	0.0019	NA	AD	iso	ENST00000338366.6_3	TAF13	TAF13-201	protein_coding
29	0.38	0.14	2.7	0.0064	NA	AD	iso	ENST00000563193.1_1	PLCG2	PLCG2-203	protein_coding
20	0.39	0.19	2	0.044	NA	AD	iso	ENST00000498683.2_2	MBP	MBP-226	protein_coding
31	0.54	0.21	2.6	0.01	NA	AD	iso	ENST00000673800.1_1	MBP	MBP-249	protein_coding
140	0.45	0.16	2.8	0.0047	NA	AD	iso	ENST00000471609.1	FCGR1B	FCGR1B-006	protein_coding
28	-0.6	0.18	-3.4	0.00072	NA	AD	iso	ENST00000463436.1_1	SFI1	SFI1-213	protein_coding
100	-0.42	0.15	-2.9	0.0041	NA	AD	iso	ENST00000495107.1_1	SFI1	SFI1-227	protein_coding
24	0.92	0.42	2.2	0.029	NA	AD	iso	ENST00000507518.5_2	HSD17B11	HSD17B11-204	protein_coding
21	-0.5	0.16	-3.2	0.0015	NA	AD	iso	ENST00000588595.5_1	UBL5	UBL5-204	protein_coding
200	0.45	0.14	3.3	0.0011	NA	AD	iso	ENST00000379454.9_5	ASPH	ASPH-203	protein_coding
47	-0.53	0.25	-2.1	0.034	NA	AD	iso	ENST00000463816.2_1	ZNF511	ZNF511-203	protein_coding
220	0.43	0.17	2.5	0.012	NA	AD	iso	ENST00000359766.7_2	TLK1	TLK1-201	protein_coding
390	0.46	0.15	3.1	0.0017	0.091	AD	iso	ENST00000431350.7_4	TLK1	TLK1-205	protein_coding
160	-0.73	0.27	-2.7	0.0066	NA	AD	iso	ENST00000361871.7_4	MSRB1	MSRB1-201	protein_coding
180	0.59	0.26	2.3	0.022	NA	AD	iso	ENST00000650623.2_3	INPP5F	INPP5F-221	protein_coding
41	-0.38	0.14	-2.7	0.007	NA	AD	iso	ENST00000462423.1_2	DENND4B	DENND4B-203	protein_coding
180	-0.72	0.24	-3	0.0023	NA	AD	iso	ENST00000362011.6_1	SHISA4	SHISA4-201	protein_coding
400	0.47	0.15	3	0.0024	0.098	AD	iso	ENST00000361183.8_2	CAPZA2	CAPZA2-201	protein_coding
270	-0.49	0.12	-4	6.1e-05	NA	AD	iso	ENST00000480139.5_3	LIME1	LIME1-205	protein_coding
22	-0.43	0.16	-2.6	0.0092	NA	AD	iso	ENST00000491382.1_1	PFDN6	PFDN6-207	protein_coding
63	0.4	0.19	2.1	0.04	NA	AD	iso	ENST00000485701.1_2	TAP2	TAP2-203	protein_coding
67	-0.52	0.18	-2.9	0.0042	NA	AD	iso	ENST00000485349.5_1	SKIV2L	SKIV2L-211	protein_coding
16	1.3	0.47	2.9	0.0043	NA	AD	iso	ENST00000488648.5_1	SKIV2L	SKIV2L-212	protein_coding
39	-0.67	0.34	-2	0.048	NA	AD	iso	ENST00000528182.5_2	SDHD	SDHD-206	protein_coding
250	0.46	0.16	2.9	0.0034	NA	AD	iso	ENST00000673097.1_2	CARD16	CARD16-208	protein_coding
11	-0.47	0.21	-2.2	0.025	NA	AD	iso	ENST00000494458.1_1	MSH5	MSH5-217	protein_coding
13	-0.48	0.21	-2.3	0.022	NA	AD	iso	ENST00000376071.4_2	NCR3	NCR3-202	protein_coding
61	0.7	0.23	3	0.0028	NA	AD	iso	ENST00000415603.1_4	DHX16	DHX16-203	protein_coding
150	-0.44	0.18	-2.4	0.016	NA	AD	iso	ENST00000489502.5_1	HLA-F	HLA-F-229	protein_coding
170	-0.48	0.21	-2.3	0.021	NA	AD	iso	ENST00000562631.6_3	ADGRG1	ADGRG1-216	protein_coding
65	-0.44	0.17	-2.7	0.0076	NA	AD	iso	ENST00000565505.1_1	ADGRG1	ADGRG1-238	protein_coding
1500	-0.39	0.16	-2.5	0.014	0.14	AD	iso	ENST00000567835.5_1	ADGRG1	ADGRG1-255	protein_coding
2300	0.45	0.16	2.8	0.0058	0.12	AD	iso	ENST00000379958.3_3	SAMD9	SAMD9-201	protein_coding
12	0.43	0.19	2.2	0.027	NA	AD	iso	ENST00000566093.1_3	CNEP1R1	CNEP1R1-207	protein_coding
31	-0.72	0.34	-2.1	0.036	NA	AD	iso	ENST00000397797.1_1	HBA1	HBA1-202	protein_coding
390	-0.38	0.14	-2.8	0.0056	0.12	AD	iso	ENST00000383788.10_6	COLQ	COLQ-203	protein_coding
31	-0.63	0.2	-3.1	0.0019	NA	AD	iso	ENST00000390346.2_2	TRGV3	TRGV3-201	protein_coding
77	-0.69	0.24	-2.9	0.0035	NA	AD	iso	ENST00000390392.3_3	TRBV4-2	TRBV4-2-201	protein_coding
65	-0.51	0.24	-2.1	0.033	NA	AD	iso	ENST00000390397.2_3	TRBV24-1	TRBV24-1-201	protein_coding
120	-0.42	0.17	-2.5	0.011	NA	AD	iso	ENST00000390399.3_1	TRBV27	TRBV27-201	protein_coding
89	-0.68	0.18	-3.9	9.4e-05	NA	AD	iso	ENST00000390442.3_1	TRAV12-3	TRAV12-3-201	protein_coding
28	-0.38	0.16	-2.4	0.014	NA	AD	iso	ENST00000390450.3_1	TRAV22	TRAV22-201	protein_coding
36	-0.63	0.27	-2.3	0.021	NA	AD	iso	ENST00000390452.2_2	TRDV1	TRDV1-201	protein_coding
27	-0.55	0.18	-3	0.0028	NA	AD	iso	ENST00000390454.2_1	TRAV25	TRAV25-201	protein_coding
69	-0.46	0.14	-3.2	0.0014	NA	AD	iso	ENST00000390458.3_1	TRAV29DV5	TRAV29DV5-201	protein_coding
4.1	-0.62	0.31	-2	0.043	NA	AD	iso	ENST00000390461.2_2	TRAV34	TRAV34-201	protein_coding
41	-0.52	0.19	-2.8	0.0053	NA	AD	iso	ENST00000390465.2_1	TRAV38-2DV8	TRAV38-2DV8-201	protein_coding
480	0.49	0.23	2.1	0.032	0.2	AD	iso	ENST00000641136.1_5	IGHG3	IGHG3-202	protein_coding
36	0.94	0.32	2.9	0.0032	NA	AD	iso	ENST00000390627.3_4	IGHV3-53	IGHV3-53-201	protein_coding
8.6	0.62	0.29	2.2	0.03	NA	AD	iso	ENST00000390628.3_6	IGHV1-58	IGHV1-58-201	protein_coding
250	-0.42	0.14	-3.1	0.0021	NA	AD	iso	ENST00000241337.9_2	GSTM2	GSTM2-201	protein_coding
81	-0.73	0.21	-3.6	0.00038	NA	AD	iso	ENST00000472225.6_1	GSTM2	GSTM2-210	protein_coding
170	-0.42	0.17	-2.5	0.012	NA	AD	iso	ENST00000476040.6_1	GSTM2	GSTM2-211	protein_coding
120	-0.49	0.17	-2.8	0.0045	NA	AD	iso	ENST00000496578.3_1	GSTM2	GSTM2-213	protein_coding
56	-0.41	0.18	-2.3	0.024	NA	AD	iso	ENST00000573538.5_5	LCAT	LCAT-205	protein_coding
45	-0.43	0.13	-3.3	0.00098	NA	AD	iso	ENST00000564677.5_2	HEXA	HEXA-204	protein_coding
4.3	-0.49	0.24	-2	0.045	NA	AD	iso	ENST00000527178.1_1	NDUFS3	NDUFS3-205	protein_coding
620	-2.4	0.9	-2.7	0.0078	0.13	AD	iso	ENST00000330597.4_3	HBG1	HBG1-201	protein_coding
5.1	-1.3	0.43	-3	0.0026	NA	AD	iso	ENST00000555118.1_2	AP1G2	AP1G2-217	protein_coding
41	-0.58	0.28	-2.1	0.039	NA	AD	iso	ENST00000397498.8_2	ARL16	ARL16-201	protein_coding
19	0.42	0.21	2	0.048	NA	AD	iso	ENST00000451629.2_1	ZSWIM8	ZSWIM8-207	protein_coding
29	-0.42	0.19	-2.2	0.029	NA	AD	iso	ENST00000487278.1_1	ZSWIM8	ZSWIM8-210	protein_coding
38	-0.39	0.18	-2.2	0.03	NA	AD	iso	ENST00000542912.5_2	PHB2	PHB2-207	protein_coding
20	-0.43	0.16	-2.7	0.0079	NA	AD	iso	ENST00000571508.5_2	NEURL4	NEURL4-205	protein_coding
12	0.56	0.19	3	0.0024	NA	AD	iso	ENST00000521796.1_1	UBXN2B	UBXN2B-203	protein_coding
7.2	-1.1	0.45	-2.4	0.015	NA	AD	iso	ENST00000571819.1_2	PAM16	PAM16-203	protein_coding
3900	0.39	0.14	2.8	0.0054	0.12	AD	iso	ENST00000409652.5_2	APOL6	APOL6-201	protein_coding
15	-0.65	0.22	-3	0.0027	NA	AD	iso	ENST00000469113.5_2	CCNL2	CCNL2-208	protein_coding
62	-0.45	0.16	-2.8	0.0059	NA	AD	iso	ENST00000495981.5_2	VPS52	VPS52-222	protein_coding
30	-0.49	0.13	-3.7	0.00025	NA	AD	iso	ENST00000432622.1_3	FAM229A	FAM229A-204	protein_coding
1200	-0.39	0.16	-2.5	0.012	0.14	AD	iso	ENST00000436911.6_4	TRGC2	TRGC2-201	protein_coding
24	-0.39	0.18	-2.1	0.034	NA	AD	iso	ENST00000560110.1_3	PATL2	PATL2-206	protein_coding
250	-0.53	0.22	-2.4	0.015	NA	AD	iso	ENST00000560775.5_3	PATL2	PATL2-207	protein_coding
41	-0.45	0.22	-2	0.041	NA	AD	iso	ENST00000454561.2_4	TRBV5-4	TRBV5-4-201	protein_coding
49	-0.4	0.12	-3.2	0.0013	NA	AD	iso	ENST00000444469.4_3	TMEM238	TMEM238-201	protein_coding
87	-1.1	0.34	-3.1	0.0017	NA	AD	iso	ENST00000434333.1_2	HLA-B	HLA-B-250	protein_coding
120	0.49	0.21	2.3	0.02	NA	AD	iso	ENST00000545251.6_3	KIAA0040	KIAA0040-203	protein_coding
8.3	0.53	0.26	2.1	0.039	NA	AD	iso	ENST00000596530.1_6	ZNF737	ZNF737-203	protein_coding
420	-0.51	0.24	-2.1	0.035	0.2	AD	iso	ENST00000360358.3_2	OR2W3	OR2W3-201	protein_coding
100	0.42	0.18	2.3	0.021	NA	AD	iso	ENST00000496418.5_2	ACAD11	ACAD11-208	protein_coding
120	-0.39	0.18	-2.2	0.031	NA	AD	iso	ENST00000371650.9_2	TMEM189	TMEM189-201	protein_coding
640	0.98	0.31	3.2	0.0016	0.089	AD	iso	ENST00000483158.1_4	IGKV3-11	IGKV3-11-201	protein_coding
620	0.49	0.16	3	0.0029	0.1	AD	iso	ENST00000374293.5_2	GNG10	GNG10-201	protein_coding
30	0.45	0.22	2	0.041	NA	AD	iso	ENST00000544308.1	NPIPB5	NPIPB5-007	protein_coding
5.4	-0.49	0.25	-2	0.05	NA	AD	iso	ENST00000475210.1_2	DDOST	DDOST-204	protein_coding
150	0.43	0.17	2.5	0.013	NA	AD	iso	ENST00000374294.3_1	DNAJC25-GNG10	DNAJC25-GNG10-201	protein_coding
63	0.88	0.28	3.2	0.0016	NA	AD	iso	ENST00000503296.6_2	N4BP2L2	N4BP2L2-209	protein_coding
170	0.4	0.2	2	0.045	NA	AD	iso	ENST00000505213.5_3	N4BP2L2	N4BP2L2-212	protein_coding
1100	0.52	0.22	2.3	0.019	0.16	AD	iso	ENST00000503719.6_2	NAIP	NAIP-204	protein_coding
97	-0.55	0.28	-2	0.05	NA	AD	iso	ENST00000503771.2_2	TMEM158	TMEM158-201	protein_coding
8.3	-0.4	0.18	-2.3	0.024	NA	AD	iso	ENST00000647249.1_1	RTEL1	RTEL1-215	protein_coding
11	-0.4	0.19	-2.1	0.037	NA	AD	iso	ENST00000579637.1_1	CEP95	CEP95-208	protein_coding
9.6	-1	0.28	-3.6	0.00036	NA	AD	iso	ENST00000557168.1_3	TRAV30	TRAV30-201	protein_coding
28	-0.4	0.2	-2	0.046	NA	AD	iso	ENST00000530054.1_3	NDUFC2-KCTD14	NDUFC2-KCTD14-202	protein_coding
400	0.57	0.16	3.7	0.00024	0.069	AD	iso	ENST00000578584.5_4	AC134669.1	AC134669.1-201	protein_coding
46	0.49	0.24	2.1	0.038	NA	AD	iso	ENST00000431216.5_4	C21orf59-TCP10L	C21orf59-TCP10L-201	protein_coding
28	1.3	0.62	2.1	0.036	NA	AD	iso	ENST00000615479.4_2	RPL17	RPL17-220	protein_coding
20	0.59	0.28	2.1	0.033	NA	AD	iso	ENST00000584723.5_3	MYO15B	MYO15B-228	protein_coding
53	0.58	0.27	2.1	0.032	NA	AD	iso	ENST00000603393.5_1	TAF15	TAF15-203	protein_coding
31	-1.3	0.44	-3	0.0023	NA	AD	iso	ENST00000611391.1_1	IGKV1D-13	IGKV1D-13-201	protein_coding
43	-0.39	0.17	-2.3	0.023	NA	AD	iso	ENST00000621344.4_2	MYO19	MYO19-225	protein_coding
99	0.7	0.28	2.5	0.012	NA	AD	iso	ENST00000535425.5_4	SCO2	SCO2-203	protein_coding
530	0.38	0.17	2.2	0.028	1	MCI	gene	ENSG00000112299.8_4	VNN1	VNN1	protein_coding
1800	0.42	0.2	2.1	0.036	1	MCI	gene	ENSG00000116299.17_5	KIAA1324	KIAA1324	protein_coding
230	0.67	0.25	2.6	0.0086	1	MCI	gene	ENSG00000140287.11_4	HDC	HDC	protein_coding
73	0.4	0.2	2	0.042	1	MCI	gene	ENSG00000149516.14_4	MS4A3	MS4A3	protein_coding
130	0.44	0.16	2.8	0.0051	1	MCI	gene	ENSG00000158089.15_4	GALNT14	GALNT14	protein_coding
110	-0.54	0.27	-2	0.044	1	MCI	gene	ENSG00000160307.10_4	S100B	S100B	protein_coding
84	0.68	0.24	2.9	0.004	1	MCI	gene	ENSG00000163751.4_3	CPA3	CPA3	protein_coding
1800	0.5	0.16	3.1	0.0017	1	MCI	gene	ENSG00000164308.17_8	ERAP2	ERAP2	protein_coding
69	-0.7	0.27	-2.6	0.01	1	MCI	gene	ENSG00000176720.6_6	BOK	BOK	protein_coding
320	0.56	0.21	2.6	0.0083	1	MCI	gene	ENSG00000179348.12_5	GATA2	GATA2	protein_coding
320	0.42	0.14	3	0.0028	1	MCI	gene	ENSG00000179639.10_2	FCER1A	FCER1A	protein_coding
45	-0.44	0.2	-2.2	0.029	1	MCI	gene	ENSG00000179914.5_4	ITLN1	ITLN1	protein_coding
460	0.53	0.25	2.1	0.032	1	MCI	gene	ENSG00000204936.10_3	CD177	CD177	protein_coding
17	0.47	0.23	2.1	0.036	1	MCI	gene	ENSG00000211611.2_3	IGKV6-21	IGKV6-21	protein_coding
51	-0.43	0.18	-2.4	0.018	1	MCI	gene	ENSG00000211640.4_2	IGLV6-57	IGLV6-57	protein_coding
74	-0.86	0.28	-3	0.0026	1	MCI	gene	ENSG00000211650.2_2	IGLV5-45	IGLV5-45	protein_coding
63	-0.44	0.17	-2.6	0.0099	1	MCI	gene	ENSG00000211750.2_4	TRBV24-1	TRBV24-1	protein_coding
5.3	0.57	0.2	2.8	0.0046	1	MCI	gene	ENSG00000211813.2_3	TRAV34	TRAV34	protein_coding
67	0.69	0.28	2.5	0.013	1	MCI	gene	ENSG00000211934.3_3	IGHV1-2	IGHV1-2	protein_coding
56	0.57	0.22	2.6	0.0093	1	MCI	gene	ENSG00000211941.3_5	IGHV3-11	IGHV3-11	protein_coding
6.9	-0.8	0.24	-3.3	0.001	1	MCI	gene	ENSG00000211946.3_7	IGHV3-20	IGHV3-20	protein_coding
350	-0.53	0.21	-2.5	0.013	1	MCI	gene	ENSG00000211949.3_5	IGHV3-23	IGHV3-23	protein_coding
45	-0.47	0.23	-2.1	0.039	1	MCI	gene	ENSG00000211965.4_4	IGHV3-49	IGHV3-49	protein_coding
12	0.7	0.28	2.5	0.012	1	MCI	gene	ENSG00000225523.2_3	IGKV6D-21	IGKV6D-21	protein_coding
24	-0.65	0.17	-3.7	0.00018	1	MCI	gene	ENSG00000229769.2_5	TRBV10-2	TRBV10-2	protein_coding
120	-0.4	0.18	-2.2	0.028	1	MCI	gene	ENSG00000240505.9_4	TNFRSF13B	TNFRSF13B	protein_coding
31	0.6	0.26	2.3	0.022	1	MCI	gene	ENSG00000240834.1	IGKV1D-12	IGKV1D-12	protein_coding
12	-0.56	0.24	-2.3	0.021	1	MCI	gene	ENSG00000241244.1_2	IGKV1D-16	IGKV1D-16	protein_coding
92	-0.5	0.2	-2.5	0.011	1	MCI	gene	ENSG00000249992.2_3	TMEM158	TMEM158	protein_coding
170	0.39	0.15	2.6	0.01	1	MCI	gene	ENSG00000256660.6_3	CLEC12B	CLEC12B	protein_coding
9.8	-0.38	0.19	-2	0.048	1	MCI	gene	ENSG00000259092.1_3	TRAV30	TRAV30	protein_coding
4.5	0.42	0.17	2.4	0.016	1	MCI	iso	ENST00000587094.2_1	PTBP1	PTBP1-211	protein_coding
790	0.38	0.14	2.7	0.0066	1	MCI	iso	ENST00000494322.5_1	SLC11A1	SLC11A1-217	protein_coding
11	-0.4	0.17	-2.3	0.019	1	MCI	iso	ENST00000505468.1_1	B4GALT7	B4GALT7-205	protein_coding
25	0.42	0.21	2	0.047	1	MCI	iso	ENST00000451005.5_3	SH3YL1	SH3YL1-209	protein_coding
77	0.81	0.26	3.1	0.0022	1	MCI	iso	ENST00000647926.1_3	EIF2AK2	EIF2AK2-208	protein_coding
230	0.43	0.21	2.1	0.04	1	MCI	iso	ENST00000403432.5_3	PUM2	PUM2-204	protein_coding
250	0.73	0.25	2.9	0.0039	1	MCI	iso	ENST00000348419.7_1	CNN2	CNN2-202	protein_coding
130	0.4	0.17	2.4	0.018	1	MCI	iso	ENST00000562075.6_3	CNN2	CNN2-204	protein_coding
18	-0.42	0.21	-2	0.043	1	MCI	iso	ENST00000549274.1_1	SMARCD1	SMARCD1-206	protein_coding
25	0.45	0.21	2.2	0.031	1	MCI	iso	ENST00000380946.3_2	KLF6	KLF6-202	protein_coding
40	0.43	0.14	3	0.0031	1	MCI	iso	ENST00000535958.1_2	TNFRSF1A	TNFRSF1A-207	protein_coding
23	0.43	0.21	2.1	0.039	1	MCI	iso	ENST00000536194.1_2	TNFRSF1A	TNFRSF1A-208	protein_coding
13	-0.5	0.25	-2	0.047	1	MCI	iso	ENST00000651907.1_1	NFKB2	NFKB2-209	protein_coding
23	0.46	0.15	3	0.0025	1	MCI	iso	ENST00000645247.1_1	PTPRC	PTPRC-216	protein_coding
23	0.39	0.2	2	0.05	1	MCI	iso	ENST00000552155.5_2	ERGIC2	ERGIC2-211	protein_coding
21	-0.54	0.17	-3.1	0.0021	1	MCI	iso	ENST00000503653.5_1	MAEA	MAEA-205	protein_coding
20	0.4	0.2	2	0.049	1	MCI	iso	ENST00000591251.1_2	HOOK2	HOOK2-217	protein_coding
16	-0.47	0.1	-4.6	4.7e-06	0.17	MCI	iso	ENST00000459646.1_1	SH3BP1	SH3BP1-202	protein_coding
240	0.41	0.16	2.6	0.0095	1	MCI	iso	ENST00000558772.5_2	AQP9	AQP9-203	protein_coding
110	0.49	0.22	2.3	0.023	1	MCI	iso	ENST00000291270.8_2	DMPK	DMPK-201	protein_coding
38	0.4	0.16	2.5	0.011	1	MCI	iso	ENST00000424768.1_2	NAMPT	NAMPT-205	protein_coding
6	-0.53	0.25	-2.1	0.036	1	MCI	iso	ENST00000481406.1_2	ADAP1	ADAP1-212	protein_coding
18	-0.46	0.21	-2.2	0.031	1	MCI	iso	ENST00000481124.5_1	TSPAN14	TSPAN14-209	protein_coding
12	0.53	0.21	2.6	0.011	1	MCI	iso	ENST00000512236.5_1	OCIAD1	OCIAD1-224	protein_coding
18	-0.41	0.2	-2	0.04	1	MCI	iso	ENST00000534158.5_5	PUS3	PUS3-204	protein_coding
15	-0.42	0.18	-2.4	0.018	1	MCI	iso	ENST00000552005.1_1	ITFG2	ITFG2-214	protein_coding
36	0.55	0.28	2	0.047	1	MCI	iso	ENST00000525674.5_2	VNN2	VNN2-208	protein_coding
17	0.58	0.24	2.4	0.016	1	MCI	iso	ENST00000526018.1_3	GNLY	GNLY-211	protein_coding
550	0.48	0.22	2.2	0.03	1	MCI	iso	ENST00000527996.5_1	KIAA1324	KIAA1324-209	protein_coding
26	0.38	0.19	2	0.044	1	MCI	iso	ENST00000498615.1_2	WLS	WLS-210	protein_coding
100	0.38	0.18	2.1	0.037	1	MCI	iso	ENST00000493594.6_2	GBP3	GBP3-208	protein_coding
35	-0.47	0.22	-2.2	0.03	1	MCI	iso	ENST00000460369.3_3	SLC2A1	SLC2A1-204	protein_coding
88	0.45	0.16	2.8	0.0059	1	MCI	iso	ENST00000548766.5_3	LRMP	LRMP-205	protein_coding
2700	0.58	0.21	2.8	0.0047	1	MCI	iso	ENST00000373106.5_3	CSF3R	CSF3R-205	protein_coding
28	0.67	0.32	2.1	0.034	1	MCI	iso	ENST00000609821.5_4	PLCG1	PLCG1-218	protein_coding
21	0.58	0.18	3.2	0.0016	1	MCI	iso	ENST00000432548.2_2	ZBP1	ZBP1-203	protein_coding
63	0.51	0.25	2	0.042	1	MCI	iso	ENST00000245923.9_3	RTN2	RTN2-201	protein_coding
45	-0.45	0.23	-2	0.05	1	MCI	iso	ENST00000381939.1_1	FAM110A	FAM110A-203	protein_coding
39	0.66	0.24	2.7	0.0063	1	MCI	iso	ENST00000555667.5_2	MAX	MAX-211	protein_coding
70	-0.41	0.16	-2.6	0.0099	1	MCI	iso	ENST00000618858.4_2	MAX	MAX-219	protein_coding
10	0.44	0.19	2.4	0.018	1	MCI	iso	ENST00000591786.5_1	SEC14L1	SEC14L1-223	protein_coding
77	0.41	0.18	2.3	0.019	1	MCI	iso	ENST00000380725.2_3	CDKN1C	CDKN1C-201	protein_coding
22	-0.87	0.29	-3	0.0023	1	MCI	iso	ENST00000471216.1_2	LILRB2	LILRB2-207	protein_coding
260	0.47	0.21	2.2	0.029	1	MCI	iso	ENST00000421134.5_3	ANKHD1	ANKHD1-207	protein_coding
28	-0.65	0.31	-2.1	0.039	1	MCI	iso	ENST00000574549.5_2	THOC6	THOC6-207	protein_coding
32	0.45	0.2	2.2	0.025	1	MCI	iso	ENST00000587307.1_1	DCAF15	DCAF15-203	protein_coding
6.2	0.44	0.2	2.2	0.028	1	MCI	iso	ENST00000467366.1_1	PTPRE	PTPRE-206	protein_coding
620	0.41	0.18	2.3	0.022	1	MCI	iso	ENST00000508376.6_1	APC	APC-207	protein_coding
180	0.51	0.24	2.1	0.036	1	MCI	iso	ENST00000667629.1_2	EGLN1	EGLN1-206	protein_coding
36	0.39	0.16	2.4	0.016	1	MCI	iso	ENST00000646900.1_1	TLR2	TLR2-208	protein_coding
40	-0.61	0.23	-2.6	0.0098	1	MCI	iso	ENST00000398245.8_2	GUCD1	GUCD1-201	protein_coding
12	-0.44	0.19	-2.3	0.02	1	MCI	iso	ENST00000554772.5_6	WARS1	WARS1-218	protein_coding
83	0.71	0.28	2.5	0.011	1	MCI	iso	ENST00000267845.8_3	HDC	HDC-201	protein_coding
97	0.67	0.27	2.5	0.013	1	MCI	iso	ENST00000559816.1_2	HDC	HDC-207	protein_coding
20	-0.42	0.14	-3	0.0024	1	MCI	iso	ENST00000563596.5_2	MAN2C1	MAN2C1-215	protein_coding
11	-0.52	0.23	-2.3	0.023	1	MCI	iso	ENST00000558751.1_1	IGF1R	IGF1R-204	protein_coding
48	0.54	0.19	2.8	0.0054	1	MCI	iso	ENST00000543482.5_1	MCTP2	MCTP2-205	protein_coding
15	-0.47	0.22	-2.1	0.038	1	MCI	iso	ENST00000567589.1_1	RHOT2	RHOT2-217	protein_coding
0.74	0.76	0.38	2	0.048	1	MCI	iso	ENST00000563194.1_3	RPS2	RPS2-217	protein_coding
9.9	-0.38	0.12	-3.2	0.0012	1	MCI	iso	ENST00000590387.1_1	RMC1	RMC1-207	protein_coding
92	-0.43	0.2	-2.1	0.036	1	MCI	iso	ENST00000392339.5_1	SLC16A3	SLC16A3-201	protein_coding
180	0.47	0.21	2.2	0.026	1	MCI	iso	ENST00000652974.1_2	CALM2	CALM2-210	protein_coding
10	-0.46	0.18	-2.5	0.012	1	MCI	iso	ENST00000505277.1_1	ATP10D	ATP10D-204	protein_coding
25	0.39	0.16	2.3	0.019	1	MCI	iso	ENST00000510520.5_1	ROPN1L	ROPN1L-203	protein_coding
12	0.58	0.28	2.1	0.04	1	MCI	iso	ENST00000508485.2_1	FBXO38	FBXO38-212	protein_coding
140	0.54	0.18	3	0.0026	1	MCI	iso	ENST00000396298.6_1	CREB5	CREB5-202	protein_coding
18	0.38	0.18	2.1	0.039	1	MCI	iso	ENST00000524193.1_1	TACC1	TACC1-228	protein_coding
140	0.63	0.28	2.2	0.026	1	MCI	iso	ENST00000544481.1_2	UBC	UBC-212	protein_coding
97	-0.45	0.21	-2.1	0.035	1	MCI	iso	ENST00000281273.8_2	QTRT2	QTRT2-201	protein_coding
410	0.42	0.16	2.7	0.0066	1	MCI	iso	ENST00000638716.1_4	HNRNPU	HNRNPU-216	protein_coding
11	0.42	0.21	2	0.042	1	MCI	iso	ENST00000518893.1_1	LY96	LY96-202	protein_coding
42	0.52	0.18	2.9	0.0044	1	MCI	iso	ENST00000560940.5_2	AP3S2	AP3S2-214	protein_coding
100	0.51	0.17	3	0.0028	1	MCI	iso	ENST00000349752.10_3	GALNT14	GALNT14-202	protein_coding
14	-0.5	0.16	-3.1	0.0022	1	MCI	iso	ENST00000578354.5_1	SAP30BP	SAP30BP-206	protein_coding
20	-0.53	0.25	-2.2	0.031	1	MCI	iso	ENST00000594350.1_2	JOSD2	JOSD2-201	protein_coding
160	-0.87	0.37	-2.4	0.019	1	MCI	iso	ENST00000503040.5_4	RPL9	RPL9-204	protein_coding
80	0.7	0.24	2.9	0.0035	1	MCI	iso	ENST00000296046.4_2	CPA3	CPA3-201	protein_coding
1500	0.53	0.18	3	0.0028	1	MCI	iso	ENST00000437043.8_4	ERAP2	ERAP2-202	protein_coding
53	-0.38	0.18	-2.1	0.032	1	MCI	iso	ENST00000460980.5_2	FASTK	FASTK-204	protein_coding
320	-0.43	0.22	-2	0.048	1	MCI	iso	ENST00000375746.1_1	SYK	SYK-201	protein_coding
5.8	-0.4	0.15	-2.7	0.006	1	MCI	iso	ENST00000574989.1_2	COX11	COX11-207	protein_coding
10	0.77	0.33	2.3	0.021	1	MCI	iso	ENST00000528805.1_1	STX3	STX3-202	protein_coding
16	-0.48	0.24	-2	0.045	1	MCI	iso	ENST00000597887.5_1	NIBAN3	NIBAN3-206	protein_coding
110	-0.4	0.19	-2.1	0.037	1	MCI	iso	ENST00000599124.1_2	NIBAN3	NIBAN3-207	protein_coding
27	-0.4	0.19	-2.1	0.034	1	MCI	iso	ENST00000412814.1_3	CX3CR1	CX3CR1-203	protein_coding
25	-0.78	0.31	-2.5	0.012	1	MCI	iso	ENST00000565845.5_3	ATXN2L	ATXN2L-217	protein_coding
2.9	0.72	0.26	2.7	0.0063	1	MCI	iso	ENST00000566175.1_4	XPO6	XPO6-210	protein_coding
6.9	0.51	0.26	2	0.046	1	MCI	iso	ENST00000510873.6_2	C15orf40	C15orf40-206	protein_coding
29	0.51	0.25	2	0.043	1	MCI	iso	ENST00000350667.4_1	CLEC12A	CLEC12A-202	protein_coding
64	0.53	0.19	2.8	0.0047	1	MCI	iso	ENST00000396507.7_1	CLEC12A	CLEC12A-204	protein_coding
11	0.39	0.17	2.3	0.021	1	MCI	iso	ENST00000628118.1_1	CHD2	CHD2-213	protein_coding
19	0.46	0.18	2.5	0.011	1	MCI	iso	ENST00000418450.5_2	PARL	PARL-204	protein_coding
33	0.39	0.14	2.9	0.0041	1	MCI	iso	ENST00000547303.5_3	DDIT3	DDIT3-202	protein_coding
9.7	-0.47	0.19	-2.5	0.013	1	MCI	iso	ENST00000545562.2_2	UCP2	UCP2-210	protein_coding
68	-0.69	0.27	-2.6	0.011	1	MCI	iso	ENST00000318407.5_2	BOK	BOK-201	protein_coding
15	-0.4	0.17	-2.4	0.016	1	MCI	iso	ENST00000529717.5_2	DEAF1	DEAF1-210	protein_coding
18	0.44	0.19	2.3	0.019	1	MCI	iso	ENST00000582392.2_2	C18orf32	C18orf32-202	protein_coding
9.2	1.5	0.71	2.1	0.038	1	MCI	iso	ENST00000642413.1_1	CD151	CD151-222	protein_coding
1.3	-0.87	0.37	-2.4	0.018	1	MCI	iso	ENST00000627177.1_1	WDR6	WDR6-223	protein_coding
230	0.62	0.22	2.8	0.0046	1	MCI	iso	ENST00000341105.7_2	GATA2	GATA2-201	protein_coding
48	0.59	0.25	2.4	0.018	1	MCI	iso	ENST00000489987.1_2	GATA2	GATA2-204	protein_coding
300	0.42	0.15	2.8	0.0046	1	MCI	iso	ENST00000368115.5_1	FCER1A	FCER1A-202	protein_coding
44	-0.42	0.21	-2	0.047	1	MCI	iso	ENST00000326245.4_3	ITLN1	ITLN1-201	protein_coding
490	-0.4	0.17	-2.4	0.016	1	MCI	iso	ENST00000322444.7_2	KCTD2	KCTD2-201	protein_coding
40	0.44	0.19	2.4	0.017	1	MCI	iso	ENST00000407188.5_1	KREMEN1	KREMEN1-203	protein_coding
1.2	0.8	0.33	2.4	0.015	1	MCI	iso	ENST00000625631.1_1	CDK10	CDK10-222	protein_coding
6.2	-0.38	0.14	-2.8	0.0051	1	MCI	iso	ENST00000440384.1_1	PTMA	PTMA-207	protein_coding
74	0.44	0.18	2.4	0.015	1	MCI	iso	ENST00000393150.7_2	CASP4	CASP4-201	protein_coding
10	-0.64	0.19	-3.5	0.00051	1	MCI	iso	ENST00000522180.5_2	TBC1D9B	TBC1D9B-215	protein_coding
1.6	-0.72	0.29	-2.5	0.012	1	MCI	iso	ENST00000465422.1_2	SVIL	SVIL-207	protein_coding
34	-0.39	0.17	-2.3	0.02	1	MCI	iso	ENST00000578181.1_1	RPL23A	RPL23A-207	protein_coding
19	-0.4	0.12	-3.4	0.00067	1	MCI	iso	ENST00000568319.5_2	APRT	APRT-209	protein_coding
37	-0.44	0.21	-2.1	0.036	1	MCI	iso	ENST00000504128.5_4	RACK1	RACK1-209	protein_coding
440	0.53	0.24	2.2	0.031	1	MCI	iso	ENST00000618265.5_2	CD177	CD177-203	protein_coding
15	0.38	0.19	2	0.042	1	MCI	iso	ENST00000380751.9_3	SERF1B	SERF1B-202	protein_coding
73	-0.94	0.41	-2.3	0.022	1	MCI	iso	ENST00000396634.5_3	HLA-A	HLA-A-204	protein_coding
16	0.48	0.23	2.1	0.035	1	MCI	iso	ENST00000390256.2_2	IGKV6-21	IGKV6-21-201	protein_coding
50	-0.42	0.18	-2.3	0.023	1	MCI	iso	ENST00000390285.4_2	IGLV6-57	IGLV6-57-201	protein_coding
73	-0.84	0.28	-3	0.0031	1	MCI	iso	ENST00000390296.2_1	IGLV5-45	IGLV5-45-201	protein_coding
63	-0.43	0.17	-2.5	0.013	1	MCI	iso	ENST00000390397.2_3	TRBV24-1	TRBV24-1-201	protein_coding
5.2	0.58	0.2	2.8	0.0044	1	MCI	iso	ENST00000390461.2_2	TRAV34	TRAV34-201	protein_coding
67	0.69	0.28	2.5	0.012	1	MCI	iso	ENST00000390594.3_2	IGHV1-2	IGHV1-2-201	protein_coding
55	0.57	0.22	2.6	0.0094	1	MCI	iso	ENST00000390601.3_4	IGHV3-11	IGHV3-11-201	protein_coding
6.8	-0.79	0.25	-3.2	0.0013	1	MCI	iso	ENST00000390606.3_6	IGHV3-20	IGHV3-20-201	protein_coding
340	-0.51	0.21	-2.5	0.014	1	MCI	iso	ENST00000390609.3_4	IGHV3-23	IGHV3-23-201	protein_coding
44	-0.46	0.23	-2	0.047	1	MCI	iso	ENST00000390625.3_3	IGHV3-49	IGHV3-49-201	protein_coding
13	0.61	0.3	2	0.043	1	MCI	iso	ENST00000390634.3_2	IGHV2-70D	IGHV2-70D-201	protein_coding
15	0.42	0.19	2.2	0.029	1	MCI	iso	ENST00000537351.5_2	STARD10	STARD10-209	protein_coding
12	0.72	0.28	2.5	0.011	1	MCI	iso	ENST00000436451.2_3	IGKV6D-21	IGKV6D-21-201	protein_coding
24	-0.65	0.18	-3.7	0.00025	1	MCI	iso	ENST00000426318.2_4	TRBV10-2	TRBV10-2-201	protein_coding
31	0.59	0.26	2.3	0.024	1	MCI	iso	ENST00000390276.2	IGKV1D-12	IGKV1D-12-001	protein_coding
12	-0.55	0.24	-2.2	0.025	1	MCI	iso	ENST00000492446.1_1	IGKV1D-16	IGKV1D-16-201	protein_coding
91	-0.49	0.2	-2.5	0.013	1	MCI	iso	ENST00000503771.2_2	TMEM158	TMEM158-201	protein_coding
36	-0.62	0.29	-2.1	0.033	1	MCI	iso	ENST00000531372.1_3	IGLL5	IGLL5-202	protein_coding
38	0.39	0.16	2.5	0.011	1	MCI	iso	ENST00000481972.5_2	HTD2	HTD2-206	protein_coding
71	0.44	0.16	2.7	0.0072	1	MCI	iso	ENST00000338896.10_2	CLEC12B	CLEC12B-201	protein_coding
27	0.47	0.23	2.1	0.038	1	MCI	iso	ENST00000544853.5_1	CLEC12B	CLEC12B-205	protein_coding
20	-0.54	0.23	-2.3	0.02	1	MCI	iso	ENST00000642087.1_1	AC073111.4	AC073111.4-206	protein_coding
220	-0.49	0.18	-2.6	0.0082	0.6	SCD	gene	ENSG00000010030.14_5	ETV7	ETV7	protein_coding
1300	-0.63	0.25	-2.5	0.012	0.7	SCD	gene	ENSG00000012223.13_5	LTF	LTF	protein_coding
43	-0.47	0.22	-2.2	0.03	0.89	SCD	gene	ENSG00000048462.11_5	TNFRSF17	TNFRSF17	protein_coding
2200	-0.41	0.12	-3.3	0.00081	0.21	SCD	gene	ENSG00000055332.18_7	EIF2AK2	EIF2AK2	protein_coding
1300	0.4	0.2	2	0.043	0.97	SCD	gene	ENSG00000071082.11_4	RPL31	RPL31	protein_coding
82	-0.55	0.16	-3.4	0.00061	0.2	SCD	gene	ENSG00000078081.8_5	LAMP3	LAMP3	protein_coding
650	-0.78	0.21	-3.7	0.00021	0.15	SCD	gene	ENSG00000088827.12_3	SIGLEC1	SIGLEC1	protein_coding
3000	-0.5	0.14	-3.6	0.00035	0.15	SCD	gene	ENSG00000089127.13_6	OAS1	OAS1	protein_coding
85	-0.54	0.22	-2.4	0.015	0.75	SCD	gene	ENSG00000096006.11_3	CRISP3	CRISP3	protein_coding
180	-0.46	0.16	-2.8	0.0054	0.5	SCD	gene	ENSG00000101057.16_3	MYBL2	MYBL2	protein_coding
310	-0.42	0.19	-2.2	0.03	0.89	SCD	gene	ENSG00000101425.14_6	BPI	BPI	protein_coding
160	-0.78	0.27	-2.9	0.0043	0.45	SCD	gene	ENSG00000102837.7_3	OLFM4	OLFM4	protein_coding
71	0.42	0.22	2	0.049	0.99	SCD	gene	ENSG00000105048.17_7	TNNT1	TNNT1	protein_coding
680	0.45	0.22	2	0.042	0.97	SCD	gene	ENSG00000109475.16_2	RPL34	RPL34	protein_coding
5400	-0.72	0.2	-3.7	0.00025	0.15	SCD	gene	ENSG00000111331.13_5	OAS3	OAS3	protein_coding
4300	-0.42	0.13	-3.4	0.00078	0.21	SCD	gene	ENSG00000111335.12_4	OAS2	OAS2	protein_coding
48	-0.64	0.18	-3.6	0.00033	0.15	SCD	gene	ENSG00000117399.14_3	CDC20	CDC20	protein_coding
170	-0.66	0.26	-2.5	0.012	0.71	SCD	gene	ENSG00000118113.12_4	MMP8	MMP8	protein_coding
130	-0.46	0.19	-2.4	0.018	0.78	SCD	gene	ENSG00000118520.15_3	ARG1	ARG1	protein_coding
6700	-0.52	0.18	-2.9	0.0034	0.42	SCD	gene	ENSG00000119917.14_3	IFIT3	IFIT3	protein_coding
490	-0.42	0.16	-2.6	0.0084	0.6	SCD	gene	ENSG00000123610.5_3	TNFAIP6	TNFAIP6	protein_coding
3100	-0.59	0.17	-3.4	0.00067	0.2	SCD	gene	ENSG00000126709.15_4	IFI6	IFI6	protein_coding
40	-0.46	0.13	-3.4	0.00062	0.2	SCD	gene	ENSG00000127564.17_6	PKMYT1	PKMYT1	protein_coding
1300	-0.46	0.2	-2.3	0.024	0.85	SCD	gene	ENSG00000132465.11_5	JCHAIN	JCHAIN	protein_coding
3600	-0.43	0.12	-3.5	0.00045	0.17	SCD	gene	ENSG00000132530.17_5	XAF1	XAF1	protein_coding
55	-0.48	0.16	-2.9	0.0038	0.43	SCD	gene	ENSG00000133063.16_4	CHIT1	CHIT1	protein_coding
1400	-0.56	0.15	-3.8	0.00014	0.11	SCD	gene	ENSG00000133106.14_4	EPSTI1	EPSTI1	protein_coding
440	-0.47	0.23	-2	0.046	0.98	SCD	gene	ENSG00000133742.13_6	CA1	CA1	protein_coding
76	-0.39	0.1	-3.9	9.3e-05	0.097	SCD	gene	ENSG00000134057.15_4	CCNB1	CCNB1	protein_coding
1700	-1.2	0.27	-4.3	1.4e-05	0.047	SCD	gene	ENSG00000134321.12_3	RSAD2	RSAD2	protein_coding
660	-0.83	0.2	-4.1	4.2e-05	0.077	SCD	gene	ENSG00000134326.11_5	CMPK2	CMPK2	protein_coding
79	0.43	0.21	2.1	0.038	0.94	SCD	gene	ENSG00000134545.13_6	KLRC1	KLRC1	protein_coding
2200	-0.39	0.13	-2.9	0.0033	0.41	SCD	gene	ENSG00000135114.12_3	OASL	OASL	protein_coding
1200	-1.1	0.26	-4.3	1.8e-05	0.047	SCD	gene	ENSG00000137959.16_4	IFI44L	IFI44L	protein_coding
670	-0.79	0.23	-3.4	0.00064	0.2	SCD	gene	ENSG00000137965.11_3	IFI44	IFI44	protein_coding
1600	-0.63	0.19	-3.4	0.00071	0.2	SCD	gene	ENSG00000138646.9_4	HERC5	HERC5	protein_coding
110	0.39	0.14	2.9	0.0041	0.44	SCD	gene	ENSG00000142156.15_3	COL6A1	COL6A1	protein_coding
540	-0.63	0.23	-2.7	0.0061	0.52	SCD	gene	ENSG00000148346.12_4	LCN2	LCN2	protein_coding
280	-0.48	0.13	-3.6	0.00027	0.15	SCD	gene	ENSG00000148773.14_5	MKI67	MKI67	protein_coding
1100	-0.57	0.17	-3.3	0.00087	0.22	SCD	gene	ENSG00000149131.16_5	SERPING1	SERPING1	protein_coding
110	-0.5	0.16	-3	0.0025	0.36	SCD	gene	ENSG00000152766.6_4	ANKRD22	ANKRD22	protein_coding
5800	-0.55	0.17	-3.3	0.0011	0.25	SCD	gene	ENSG00000157601.14_4	MX1	MX1	protein_coding
5300	-0.46	0.15	-3.1	0.0021	0.34	SCD	gene	ENSG00000160932.11_5	LY6E	LY6E	protein_coding
37	-0.41	0.17	-2.4	0.017	0.78	SCD	gene	ENSG00000163958.14_4	ZDHHC19	ZDHHC19	protein_coding
100	-1.5	0.27	-5.6	1.7e-08	0.00022	SCD	gene	ENSG00000165949.12_6	IFI27	IFI27	protein_coding
45	0.43	0.2	2.2	0.027	0.87	SCD	gene	ENSG00000166444.19_7	DENND2B	DENND2B	protein_coding
180	0.54	0.21	2.5	0.011	0.67	SCD	gene	ENSG00000167633.18_2	KIR3DL1	KIR3DL1	protein_coding
250	-0.64	0.24	-2.7	0.0068	0.56	SCD	gene	ENSG00000167768.4_4	KRT1	KRT1	protein_coding
78	-0.51	0.13	-4	7e-05	0.09	SCD	gene	ENSG00000167900.12_4	TK1	TK1	protein_coding
460	-0.5	0.18	-2.8	0.0057	0.51	SCD	gene	ENSG00000168062.10_6	BATF2	BATF2	protein_coding
170	-0.64	0.15	-4.2	2.8e-05	0.061	SCD	gene	ENSG00000171848.15_5	RRM2	RRM2	protein_coding
71	0.47	0.17	2.9	0.0042	0.45	SCD	gene	ENSG00000174807.4_3	CD248	CD248	protein_coding
100	-0.53	0.15	-3.6	0.00029	0.15	SCD	gene	ENSG00000176890.16_3	TYMS	TYMS	protein_coding
60	-0.47	0.16	-3	0.0031	0.4	SCD	gene	ENSG00000179044.16_5	EXOC3L1	EXOC3L1	protein_coding
320	0.43	0.15	2.9	0.0035	0.42	SCD	gene	ENSG00000179639.10_2	FCER1A	FCER1A	protein_coding
45	-0.51	0.22	-2.4	0.017	0.78	SCD	gene	ENSG00000179914.5_4	ITLN1	ITLN1	protein_coding
170	-0.58	0.17	-3.4	0.00067	0.2	SCD	gene	ENSG00000184979.10_3	USP18	USP18	protein_coding
2300	-0.68	0.23	-2.9	0.0034	0.42	SCD	gene	ENSG00000185745.10_3	IFIT1	IFIT1	protein_coding
2000	-0.68	0.19	-3.5	0.00039	0.16	SCD	gene	ENSG00000187608.10_7	ISG15	ISG15	protein_coding
270	-0.49	0.14	-3.6	0.00036	0.15	SCD	gene	ENSG00000188157.15_5	AGRN	AGRN	protein_coding
1500	-0.41	0.1	-4	6.9e-05	0.09	SCD	gene	ENSG00000188313.13_6	PLSCR1	PLSCR1	protein_coding
210	-0.43	0.13	-3.3	0.00089	0.22	SCD	gene	ENSG00000196141.14_6	SPATS2L	SPATS2L	protein_coding
120	-0.4	0.16	-2.6	0.01	0.66	SCD	gene	ENSG00000196169.15_3	KIF19	KIF19	protein_coding
5400	-1.3	0.38	-3.4	0.00068	0.2	SCD	gene	ENSG00000196565.15_6	HBG2	HBG2	protein_coding
180	-0.55	0.17	-3.3	0.00097	0.23	SCD	gene	ENSG00000197262.8	CCL4L2	CCL4L2	protein_coding
370	-0.48	0.24	-2	0.046	0.98	SCD	gene	ENSG00000204936.10_3	CD177	CD177	protein_coding
51	-0.55	0.17	-3.2	0.0012	0.25	SCD	gene	ENSG00000211640.4_2	IGLV6-57	IGLV6-57	protein_coding
80	-0.82	0.31	-2.7	0.0073	0.57	SCD	gene	ENSG00000211650.2_2	IGLV5-45	IGLV5-45	protein_coding
190	-0.49	0.21	-2.3	0.021	0.84	SCD	gene	ENSG00000211663.2_2	IGLV3-19	IGLV3-19	protein_coding
59	-0.53	0.26	-2.1	0.04	0.96	SCD	gene	ENSG00000211669.3_3	IGLV3-10	IGLV3-10	protein_coding
32	-0.59	0.26	-2.3	0.023	0.85	SCD	gene	ENSG00000211670.2_3	IGLV3-9	IGLV3-9	protein_coding
170	0.57	0.19	3.1	0.002	0.33	SCD	gene	ENSG00000211695.2_3	TRGV9	TRGV9	protein_coding
34	0.48	0.18	2.6	0.0085	0.6	SCD	gene	ENSG00000211697.4_6	TRGV5	TRGV5	protein_coding
43	0.49	0.19	2.6	0.0093	0.63	SCD	gene	ENSG00000211698.2_4	TRGV4	TRGV4	protein_coding
25	0.38	0.16	2.4	0.016	0.77	SCD	gene	ENSG00000211724.3_5	TRBV6-6	TRBV6-6	protein_coding
19	0.42	0.15	2.9	0.0041	0.44	SCD	gene	ENSG00000211725.3_3	TRBV5-5	TRBV5-5	protein_coding
9.8	1	0.3	3.4	0.00069	0.2	SCD	gene	ENSG00000211812.1_2	TRAV26-2	TRAV26-2	protein_coding
130	0.76	0.29	2.6	0.0085	0.6	SCD	gene	ENSG00000211821.2_2	TRDV2	TRDV2	protein_coding
59	0.59	0.19	3.1	0.0019	0.32	SCD	gene	ENSG00000211891.6_5	IGHE	IGHE	protein_coding
100	-0.39	0.18	-2.2	0.027	0.87	SCD	gene	ENSG00000211937.3_6	IGHV2-5	IGHV2-5	protein_coding
98	-0.43	0.17	-2.5	0.014	0.75	SCD	gene	ENSG00000211938.2_4	IGHV3-7	IGHV3-7	protein_coding
7.2	-0.74	0.26	-2.8	0.0052	0.49	SCD	gene	ENSG00000211946.3_7	IGHV3-20	IGHV3-20	protein_coding
350	-0.75	0.21	-3.6	0.00033	0.15	SCD	gene	ENSG00000211949.3_5	IGHV3-23	IGHV3-23	protein_coding
130	-0.58	0.26	-2.2	0.028	0.88	SCD	gene	ENSG00000211955.2_3	IGHV3-33	IGHV3-33	protein_coding
16	-0.44	0.2	-2.2	0.027	0.87	SCD	gene	ENSG00000211964.3_3	IGHV3-48	IGHV3-48	protein_coding
47	-0.54	0.24	-2.2	0.026	0.86	SCD	gene	ENSG00000211965.4_4	IGHV3-49	IGHV3-49	protein_coding
110	-0.53	0.21	-2.6	0.01	0.65	SCD	gene	ENSG00000214967.5_3	NPIPA7	NPIPA7	protein_coding
150	0.69	0.16	4.3	1.5e-05	0.047	SCD	gene	ENSG00000226660.2_3	TRBV2	TRBV2	protein_coding
72	0.45	0.14	3.2	0.0012	0.26	SCD	gene	ENSG00000229200.2	TRBV7-8	TRBV7-8	protein_coding
60	0.5	0.14	3.5	0.00047	0.17	SCD	gene	ENSG00000237254.2_3	TRBV30	TRBV30	protein_coding
67	-0.41	0.13	-3.3	0.001	0.24	SCD	gene	ENSG00000237649.8_3	KIFC1	KIFC1	protein_coding
390	-0.44	0.18	-2.4	0.015	0.75	SCD	gene	ENSG00000238243.3_3	OR2W3	OR2W3	protein_coding
57	-0.68	0.29	-2.4	0.018	0.79	SCD	gene	ENSG00000239920.2_8	AC104389.5	AC104389.5	protein_coding
100	-0.45	0.19	-2.4	0.018	0.78	SCD	gene	ENSG00000240864.3_4	IGKV1-16	IGKV1-16	protein_coding
90	-0.79	0.2	-3.9	9.9e-05	0.097	SCD	gene	ENSG00000249992.2_3	TMEM158	TMEM158	protein_coding
400	-0.49	0.17	-2.8	0.0044	0.45	SCD	gene	ENSG00000254709.8_4	IGLL5	IGLL5	protein_coding
8.9	-0.47	0.19	-2.5	0.011	0.67	SCD	gene	ENSG00000255221.3_4	CARD17	CARD17	protein_coding
330	-0.4	0.16	-2.5	0.012	0.7	SCD	gene	ENSG00000257017.4	HP	HP	protein_coding
9.9	-0.43	0.2	-2.1	0.033	0.9	SCD	gene	ENSG00000259092.1_3	TRAV30	TRAV30	protein_coding
250	-0.6	0.25	-2.4	0.016	0.77	SCD	gene	ENSG00000278196.3_4	IGLV2-8	IGLV2-8	protein_coding
26	0.69	0.31	2.2	0.026	0.85	SCD	gene	ENSG00000285283.1_2	AL035078.4	AL035078.4	protein_coding
67	-0.64	0.24	-2.7	0.008	0.7	SCD	iso	ENST00000618908.4_1	LAP3	LAP3-211	protein_coding
1200	0.38	0.16	2.5	0.014	0.84	SCD	iso	ENST00000529550.5_2	IL32	IL32-215	protein_coding
150	-0.4	0.18	-2.2	0.029	0.89	SCD	iso	ENST00000544690.6_2	TYROBP	TYROBP-203	protein_coding
1200	-0.59	0.25	-2.4	0.017	0.86	SCD	iso	ENST00000426532.6_3	LTF	LTF-203	protein_coding
58	0.48	0.16	3	0.0031	0.54	SCD	iso	ENST00000592857.5_4	SLC25A39	SLC25A39-216	protein_coding
86	0.46	0.21	2.2	0.031	0.9	SCD	iso	ENST00000503811.5_1	MATR3	MATR3-206	protein_coding
17	-0.42	0.17	-2.5	0.013	0.82	SCD	iso	ENST00000528124.1_2	OSBPL5	OSBPL5-212	protein_coding
26	0.4	0.15	2.7	0.0062	0.66	SCD	iso	ENST00000456164.5_3	FBXO42	FBXO42-203	protein_coding
43	-0.46	0.22	-2.1	0.038	0.91	SCD	iso	ENST00000053243.6_3	TNFRSF17	TNFRSF17-201	protein_coding
110	0.39	0.13	3	0.0028	0.53	SCD	iso	ENST00000510092.5_1	ANAPC4	ANAPC4-210	protein_coding
2100	-0.41	0.12	-3.3	0.0011	0.43	SCD	iso	ENST00000233057.9_3	EIF2AK2	EIF2AK2-201	protein_coding
85	0.46	0.23	2	0.042	0.92	SCD	iso	ENST00000550107.5_4	PPP1R12A	PPP1R12A-213	protein_coding
13	0.44	0.19	2.3	0.02	0.86	SCD	iso	ENST00000511293.1_5	RIOK2	RIOK2-206	protein_coding
300	-0.63	0.32	-2	0.048	0.93	SCD	iso	ENST00000672887.1_2	TNK2	TNK2-221	protein_coding
120	0.38	0.18	2.1	0.039	0.91	SCD	iso	ENST00000370513.9_2	PKN2	PKN2-202	protein_coding
46	0.72	0.3	2.4	0.016	0.86	SCD	iso	ENST00000378465.7_4	FAM107B	FAM107B-204	protein_coding
12	-0.47	0.18	-2.7	0.0071	0.68	SCD	iso	ENST00000494508.1_1	SP100	SP100-218	protein_coding
79	-0.4	0.12	-3.2	0.0014	0.48	SCD	iso	ENST00000246911.6_1	IFI35	IFI35-201	protein_coding
12	-0.43	0.21	-2.1	0.037	0.91	SCD	iso	ENST00000534876.1_1	IFI35	IFI35-205	protein_coding
250	0.48	0.22	2.2	0.03	0.9	SCD	iso	ENST00000409320.7_2	RPL31	RPL31-205	protein_coding
190	0.55	0.22	2.5	0.011	0.81	SCD	iso	ENST00000409733.5_2	RPL31	RPL31-208	protein_coding
610	0.46	0.22	2	0.041	0.92	SCD	iso	ENST00000456292.5_2	RPL31	RPL31-211	protein_coding
35	0.47	0.21	2.2	0.027	0.88	SCD	iso	ENST00000544866.5_3	PDCD2	PDCD2-213	protein_coding
23	0.77	0.39	2	0.048	0.93	SCD	iso	ENST00000486860.5_2	SRI	SRI-207	protein_coding
8.8	-0.48	0.15	-3.2	0.0013	0.46	SCD	iso	ENST00000431155.1_1	GRAMD4	GRAMD4-204	protein_coding
86	-0.41	0.16	-2.6	0.0087	0.72	SCD	iso	ENST00000503339.5_2	FRYL	FRYL-206	protein_coding
3.3	0.49	0.23	2.1	0.034	0.9	SCD	iso	ENST00000635392.1_5	SMARCA2	SMARCA2-240	protein_coding
11	0.61	0.25	2.4	0.015	0.85	SCD	iso	ENST00000473886.1_2	GSK3B	GSK3B-203	protein_coding
520	-0.77	0.21	-3.7	0.00023	0.29	SCD	iso	ENST00000344754.5_2	SIGLEC1	SIGLEC1-201	protein_coding
1700	-0.46	0.17	-2.8	0.0055	0.65	SCD	iso	ENST00000202917.10_2	OAS1	OAS1-201	protein_coding
550	-0.54	0.21	-2.5	0.012	0.82	SCD	iso	ENST00000452357.6_1	OAS1	OAS1-203	protein_coding
74	-0.49	0.18	-2.7	0.0071	0.68	SCD	iso	ENST00000549820.1_1	OAS1	OAS1-205	protein_coding
140	-0.7	0.24	-3	0.0028	0.54	SCD	iso	ENST00000551241.5_2	OAS1	OAS1-208	protein_coding
370	-0.47	0.22	-2.2	0.03	0.9	SCD	iso	ENST00000553152.1_1	OAS1	OAS1-210	protein_coding
99	-0.64	0.27	-2.4	0.018	0.86	SCD	iso	ENST00000553400.1_2	DDX24	DDX24-203	protein_coding
3400	0.76	0.28	2.7	0.0072	0.68	SCD	iso	ENST00000548839.1_1	LYZ	LYZ-202	protein_coding
75	0.51	0.22	2.3	0.023	0.87	SCD	iso	ENST00000430841.6_2	ECHDC1	ECHDC1-207	protein_coding
85	-0.56	0.26	-2.1	0.034	0.9	SCD	iso	ENST00000420366.5_4	SH2D3C	SH2D3C-205	protein_coding
81	-0.53	0.23	-2.3	0.022	0.87	SCD	iso	ENST00000263045.8_2	CRISP3	CRISP3-201	protein_coding
77	0.6	0.28	2.1	0.034	0.9	SCD	iso	ENST00000491200.5_1	HNRNPH3	HNRNPH3-211	protein_coding
89	1.9	0.84	2.3	0.022	0.87	SCD	iso	ENST00000402229.5_2	PACSIN2	PACSIN2-203	protein_coding
20	-0.5	0.2	-2.5	0.012	0.82	SCD	iso	ENST00000431535.5_2	ASCC2	ASCC2-205	protein_coding
370	-0.42	0.12	-3.6	0.00037	0.31	SCD	iso	ENST00000426053.5_1	APOL1	APOL1-206	protein_coding
47	0.68	0.3	2.2	0.025	0.87	SCD	iso	ENST00000556813.1_3	PSMC6	PSMC6-212	protein_coding
58	-0.38	0.19	-2	0.047	0.93	SCD	iso	ENST00000553660.5_2	CNIH1	CNIH1-203	protein_coding
170	-0.45	0.16	-2.7	0.006	0.66	SCD	iso	ENST00000217026.5_2	MYBL2	MYBL2-201	protein_coding
50	0.56	0.21	2.7	0.0078	0.69	SCD	iso	ENST00000466563.6_2	SUPT20H	SUPT20H-206	protein_coding
160	-0.75	0.27	-2.8	0.0053	0.65	SCD	iso	ENST00000219022.3_2	OLFM4	OLFM4-201	protein_coding
39	1.3	0.66	2	0.048	0.93	SCD	iso	ENST00000397817.5_1	MPG	MPG-203	protein_coding
29	0.67	0.25	2.6	0.0089	0.72	SCD	iso	ENST00000574157.5_1	NOMO3	NOMO3-211	protein_coding
76	0.85	0.28	3	0.0026	0.53	SCD	iso	ENST00000539677.1_2	CPPED1	CPPED1-204	protein_coding
140	-0.46	0.16	-2.9	0.0034	0.56	SCD	iso	ENST00000559769.1_2	DMXL2	DMXL2-209	protein_coding
500	0.42	0.14	3	0.0025	0.53	SCD	iso	ENST00000395119.7_2	EEF1D	EEF1D-202	protein_coding
17	-0.45	0.19	-2.3	0.019	0.86	SCD	iso	ENST00000587083.1_2	TLE5	TLE5-208	protein_coding
63	0.71	0.35	2	0.044	0.92	SCD	iso	ENST00000417758.5_3	DNAJB6	DNAJB6-203	protein_coding
43	0.53	0.22	2.5	0.014	0.84	SCD	iso	ENST00000494066.1_2	NMRK1	NMRK1-207	protein_coding
28	0.54	0.24	2.2	0.025	0.87	SCD	iso	ENST00000631679.1_2	DVL1	DVL1-205	protein_coding
17	-0.46	0.18	-2.6	0.0099	0.75	SCD	iso	ENST00000474873.5_2	HPS1	HPS1-210	protein_coding
12	-0.67	0.3	-2.2	0.025	0.88	SCD	iso	ENST00000578718.1_1	KPNB1	KPNB1-206	protein_coding
80	-0.46	0.21	-2.2	0.026	0.88	SCD	iso	ENST00000578400.5_2	DDX5	DDX5-207	protein_coding
46	-0.6	0.3	-2	0.046	0.93	SCD	iso	ENST00000588419.1_2	HDAC5	HDAC5-208	protein_coding
620	0.48	0.24	2	0.042	0.92	SCD	iso	ENST00000394667.7_1	RPL34	RPL34-202	protein_coding
24	0.39	0.19	2.1	0.039	0.91	SCD	iso	ENST00000394668.2_1	RPL34	RPL34-203	protein_coding
97	0.4	0.13	3.1	0.0019	0.49	SCD	iso	ENST00000524552.5_4	HSPA8	HSPA8-203	protein_coding
14	-0.55	0.17	-3.2	0.0016	0.48	SCD	iso	ENST00000533238.5_2	HSPA8	HSPA8-220	protein_coding
15	-0.41	0.19	-2.2	0.031	0.9	SCD	iso	ENST00000457202.1_2	EHD1	EHD1-207	protein_coding
36	-0.4	0.17	-2.3	0.022	0.87	SCD	iso	ENST00000530860.5_1	DCPS	DCPS-203	protein_coding
210	0.39	0.16	2.4	0.016	0.86	SCD	iso	ENST00000529710.5_2	PPP6R3	PPP6R3-218	protein_coding
47	0.97	0.43	2.3	0.024	0.87	SCD	iso	ENST00000530839.5_6	MS4A6A	MS4A6A-213	protein_coding
310	-0.86	0.43	-2	0.047	0.93	SCD	iso	ENST00000611028.3_2	FOLR3	FOLR3-204	protein_coding
59	-0.68	0.25	-2.7	0.0074	0.68	SCD	iso	ENST00000538739.1_4	SLC15A3	SLC15A3-205	protein_coding
4.4	-0.74	0.32	-2.3	0.02	0.86	SCD	iso	ENST00000538822.1_3	ITFG2	ITFG2-207	protein_coding
26	0.39	0.2	2	0.046	0.93	SCD	iso	ENST00000550974.1_2	GPN3	GPN3-208	protein_coding
5200	-0.71	0.19	-3.7	0.00024	0.29	SCD	iso	ENST00000228928.12_2	OAS3	OAS3-201	protein_coding
10	-0.68	0.31	-2.2	0.031	0.9	SCD	iso	ENST00000546973.1_3	OAS3	OAS3-204	protein_coding
58	-0.87	0.23	-3.8	0.00013	0.26	SCD	iso	ENST00000549918.1_1	OAS3	OAS3-206	protein_coding
3300	-0.4	0.13	-3.2	0.0015	0.48	SCD	iso	ENST00000392583.6_1	OAS2	OAS2-202	protein_coding
100	-0.43	0.18	-2.4	0.018	0.86	SCD	iso	ENST00000548941.1_1	OAS2	OAS2-204	protein_coding
150	-1.5	0.65	-2.2	0.025	0.87	SCD	iso	ENST00000620097.1_2	OAS2	OAS2-207	protein_coding
310	0.46	0.21	2.2	0.028	0.89	SCD	iso	ENST00000646608.1_3	CHD4	CHD4-245	protein_coding
44	0.5	0.22	2.3	0.019	0.86	SCD	iso	ENST00000524919.5_2	VNN2	VNN2-205	protein_coding
27	0.73	0.33	2.2	0.027	0.88	SCD	iso	ENST00000540719.1_1	QKI	QKI-211	protein_coding
12	0.88	0.31	2.9	0.0039	0.6	SCD	iso	ENST00000512053.1_1	HMGCR	HMGCR-211	protein_coding
180	0.86	0.37	2.3	0.02	0.86	SCD	iso	ENST00000415690.6_2	NR3C1	NR3C1-205	protein_coding
620	-0.57	0.21	-2.7	0.0067	0.68	SCD	iso	ENST00000361099.7_4	STAT1	STAT1-201	protein_coding
64	-0.43	0.2	-2.1	0.032	0.9	SCD	iso	ENST00000392323.6_4	STAT1	STAT1-203	protein_coding
420	-0.4	0.15	-2.6	0.0096	0.74	SCD	iso	ENST00000673858.1_1	STAT1	STAT1-221	protein_coding
580	-0.5	0.25	-2	0.045	0.93	SCD	iso	ENST00000673863.1_1	STAT1	STAT1-223	protein_coding
71	0.41	0.18	2.2	0.027	0.88	SCD	iso	ENST00000409810.6_2	CHMP3	CHMP3-205	protein_coding
23	0.41	0.17	2.4	0.017	0.86	SCD	iso	ENST00000489306.1_2	CEBPZ	CEBPZ-203	protein_coding
14	0.4	0.17	2.4	0.018	0.86	SCD	iso	ENST00000428010.5_2	C2orf42	C2orf42-207	protein_coding
9	-0.46	0.21	-2.2	0.03	0.9	SCD	iso	ENST00000493077.1_2	MEF2D	MEF2D-207	protein_coding
21	0.62	0.31	2	0.041	0.92	SCD	iso	ENST00000485021.1_2	BCAS2	BCAS2-202	protein_coding
45	-0.43	0.14	-3	0.0029	0.54	SCD	iso	ENST00000459831.1_2	GBP1	GBP1-202	protein_coding
20	-0.51	0.24	-2.1	0.033	0.9	SCD	iso	ENST00000468959.1_2	GBP1	GBP1-203	protein_coding
31	-0.4	0.2	-2	0.045	0.93	SCD	iso	ENST00000484970.1_2	GBP1	GBP1-206	protein_coding
25	-0.41	0.16	-2.5	0.012	0.82	SCD	iso	ENST00000493139.1_2	GBP1	GBP1-207	protein_coding
16	-0.56	0.24	-2.4	0.017	0.86	SCD	iso	ENST00000496723.1_1	CD46	CD46-218	protein_coding
29	-1.1	0.42	-2.7	0.0065	0.67	SCD	iso	ENST00000438977.1_1	RPS6KA1	RPS6KA1-206	protein_coding
1000	-0.82	0.38	-2.2	0.031	0.9	SCD	iso	ENST00000652148.1_2	ESYT2	ESYT2-207	protein_coding
150	-0.62	0.27	-2.3	0.019	0.86	SCD	iso	ENST00000236826.8_3	MMP8	MMP8-201	protein_coding
86	0.42	0.17	2.5	0.012	0.82	SCD	iso	ENST00000548766.5_3	LRMP	LRMP-205	protein_coding
84	-0.5	0.24	-2.1	0.033	0.9	SCD	iso	ENST00000368087.8_2	ARG1	ARG1-203	protein_coding
2500	-0.59	0.21	-2.9	0.0043	0.62	SCD	iso	ENST00000371811.4_1	IFIT3	IFIT3-201	protein_coding
4100	-0.47	0.16	-2.9	0.0041	0.62	SCD	iso	ENST00000371818.9_2	IFIT3	IFIT3-202	protein_coding
290	-0.48	0.15	-3.1	0.0018	0.48	SCD	iso	ENST00000371826.4_2	IFIT2	IFIT2-201	protein_coding
23	0.55	0.22	2.5	0.013	0.82	SCD	iso	ENST00000514907.5_2	SLC35B1	SLC35B1-218	protein_coding
4	-0.48	0.23	-2.1	0.035	0.9	SCD	iso	ENST00000523721.2_2	PEX16	PEX16-203	protein_coding
19	-0.39	0.19	-2	0.044	0.92	SCD	iso	ENST00000472804.1_2	TNFSF10	TNFSF10-205	protein_coding
74	-0.48	0.2	-2.4	0.018	0.86	SCD	iso	ENST00000392871.6_2	GTDC1	GTDC1-205	protein_coding
480	0.52	0.21	2.4	0.016	0.86	SCD	iso	ENST00000493317.1_1	RPL21	RPL21-210	protein_coding
21	-0.62	0.3	-2	0.041	0.92	SCD	iso	ENST00000576819.1_2	NAA60	NAA60-234	protein_coding
73	0.42	0.16	2.6	0.0087	0.72	SCD	iso	ENST00000495810.1_2	HNRNPA2B1	HNRNPA2B1-207	protein_coding
470	-0.41	0.16	-2.5	0.012	0.82	SCD	iso	ENST00000243347.5_2	TNFAIP6	TNFAIP6-201	protein_coding
500	-0.39	0.13	-3	0.0026	0.53	SCD	iso	ENST00000371173.8_3	ZBP1	ZBP1-201	protein_coding
17	1	0.45	2.2	0.025	0.87	SCD	iso	ENST00000480585.5_3	OARD1	OARD1-211	protein_coding
44	-0.59	0.24	-2.4	0.014	0.85	SCD	iso	ENST00000381939.1_1	FAM110A	FAM110A-203	protein_coding
33	0.87	0.43	2	0.041	0.92	SCD	iso	ENST00000375477.5_3	PCID2	PCID2-205	protein_coding
49	-0.55	0.26	-2.1	0.033	0.9	SCD	iso	ENST00000592693.1_2	IGFLR1	IGFLR1-210	protein_coding
36	-0.42	0.21	-2	0.048	0.93	SCD	iso	ENST00000339145.8_2	IFI6	IFI6-201	protein_coding
2700	-0.6	0.17	-3.4	0.0006	0.36	SCD	iso	ENST00000361157.11_3	IFI6	IFI6-202	protein_coding
380	-0.55	0.17	-3.2	0.0012	0.46	SCD	iso	ENST00000362020.4_2	IFI6	IFI6-203	protein_coding
32	-0.51	0.16	-3.2	0.0012	0.44	SCD	iso	ENST00000597263.5_2	MAP2K2	MAP2K2-206	protein_coding
430	0.43	0.14	3	0.0023	0.51	SCD	iso	ENST00000543393.5_1	RAP1B	RAP1B-229	protein_coding
16	0.77	0.34	2.2	0.025	0.88	SCD	iso	ENST00000515492.5_1	TMEM175	TMEM175-219	protein_coding
26	0.52	0.17	3	0.0026	0.53	SCD	iso	ENST00000554093.1_2	MIS18BP1	MIS18BP1-210	protein_coding
42	-0.51	0.14	-3.6	0.00027	0.3	SCD	iso	ENST00000454223.1_2	HELZ2	HELZ2-203	protein_coding
120	-0.58	0.21	-2.8	0.0053	0.65	SCD	iso	ENST00000328928.11_1	THEMIS2	THEMIS2-201	protein_coding
21	0.45	0.19	2.4	0.018	0.86	SCD	iso	ENST00000490599.2_3	SLC35D2	SLC35D2-205	protein_coding
16	0.8	0.33	2.4	0.017	0.86	SCD	iso	ENST00000481037.5_2	RBM39	RBM39-232	protein_coding
62	0.51	0.23	2.2	0.027	0.88	SCD	iso	ENST00000564903.1_1	COX4I1	COX4I1-208	protein_coding
780	0.4	0.15	2.7	0.0065	0.67	SCD	iso	ENST00000479759.5_1	CAP1	CAP1-218	protein_coding
38	-0.6	0.23	-2.6	0.0093	0.74	SCD	iso	ENST00000578232.5_1	STARD3	STARD3-211	protein_coding
32	0.5	0.25	2	0.048	0.93	SCD	iso	ENST00000559309.5_2	SNRPA1	SNRPA1-207	protein_coding
140	-0.4	0.14	-2.9	0.0042	0.62	SCD	iso	ENST00000460454.1_1	TRIM22	TRIM22-209	protein_coding
400	-0.54	0.23	-2.3	0.019	0.86	SCD	iso	ENST00000254801.9_3	JCHAIN	JCHAIN-201	protein_coding
400	-0.56	0.22	-2.5	0.012	0.82	SCD	iso	ENST00000543780.5_2	JCHAIN	JCHAIN-206	protein_coding
38	0.67	0.29	2.3	0.02	0.86	SCD	iso	ENST00000611683.1_3	ZRANB2	ZRANB2-207	protein_coding
3100	-0.43	0.13	-3.4	0.00068	0.37	SCD	iso	ENST00000361842.8_4	XAF1	XAF1-202	protein_coding
13	-0.99	0.31	-3.2	0.0015	0.48	SCD	iso	ENST00000572546.5_1	XAF1	XAF1-208	protein_coding
19	-0.44	0.16	-2.7	0.0063	0.67	SCD	iso	ENST00000573518.1_1	XAF1	XAF1-209	protein_coding
3.8	-0.71	0.27	-2.6	0.0086	0.72	SCD	iso	ENST00000575267.1_1	XAF1	XAF1-215	protein_coding
190	-0.46	0.13	-3.5	0.00055	0.36	SCD	iso	ENST00000575369.5_1	XAF1	XAF1-216	protein_coding
350	0.39	0.19	2	0.047	0.93	SCD	iso	ENST00000473185.1_2	CHI3L1	CHI3L1-204	protein_coding
400	0.39	0.19	2	0.043	0.92	SCD	iso	ENST00000478742.1_2	CHI3L1	CHI3L1-205	protein_coding
940	-0.55	0.15	-3.8	0.00016	0.27	SCD	iso	ENST00000313624.11_2	EPSTI1	EPSTI1-201	protein_coding
150	-0.45	0.2	-2.2	0.025	0.87	SCD	iso	ENST00000313640.11_2	EPSTI1	EPSTI1-202	protein_coding
220	-0.57	0.18	-3.1	0.0017	0.48	SCD	iso	ENST00000398762.7_3	EPSTI1	EPSTI1-203	protein_coding
16	-0.82	0.19	-4.3	1.7e-05	0.1	SCD	iso	ENST00000535677.5_2	EPSTI1	EPSTI1-205	protein_coding
28	-1	0.48	-2.1	0.032	0.9	SCD	iso	ENST00000517618.5_4	CA1	CA1-204	protein_coding
97	0.42	0.21	2	0.043	0.92	SCD	iso	ENST00000369567.5_2	AP4B1	AP4B1-203	protein_coding
1600	-1.2	0.28	-4.3	1.5e-05	0.1	SCD	iso	ENST00000382040.4_2	RSAD2	RSAD2-201	protein_coding
520	-0.88	0.21	-4.2	2.5e-05	0.13	SCD	iso	ENST00000256722.9_4	CMPK2	CMPK2-201	protein_coding
140	0.43	0.18	2.3	0.02	0.86	SCD	iso	ENST00000460405.5_1	LDHA	LDHA-207	protein_coding
44	0.44	0.18	2.4	0.015	0.85	SCD	iso	ENST00000478378.5_1	TIMM17A	TIMM17A-202	protein_coding
630	0.39	0.17	2.3	0.02	0.86	SCD	iso	ENST00000508376.6_1	APC	APC-207	protein_coding
1400	-0.4	0.13	-3	0.0027	0.53	SCD	iso	ENST00000257570.9_2	OASL	OASL-201	protein_coding
15	-0.43	0.16	-2.7	0.0064	0.67	SCD	iso	ENST00000548277.1_1	TRAFD1	TRAFD1-205	protein_coding
28	-0.44	0.17	-2.7	0.0079	0.7	SCD	iso	ENST00000552164.5_2	CD63	CD63-213	protein_coding
100	0.41	0.16	2.5	0.013	0.82	SCD	iso	ENST00000548108.1_2	TFCP2	TFCP2-203	protein_coding
6.9	-0.4	0.19	-2.1	0.032	0.9	SCD	iso	ENST00000400501.2_1	MDM2	MDM2-214	protein_coding
64	0.39	0.19	2	0.045	0.93	SCD	iso	ENST00000476717.2_3	EGLN1	EGLN1-202	protein_coding
12	-0.42	0.19	-2.2	0.025	0.87	SCD	iso	ENST00000548425.1_2	APPL2	APPL2-208	protein_coding
36	0.38	0.16	2.4	0.017	0.86	SCD	iso	ENST00000646900.1_1	TLR2	TLR2-208	protein_coding
950	0.43	0.22	2	0.048	0.93	SCD	iso	ENST00000519115.5_1	SDCBP	SDCBP-206	protein_coding
95	0.82	0.31	2.7	0.0074	0.68	SCD	iso	ENST00000532520.1_2	CASP1	CASP1-214	protein_coding
1000	-1.1	0.26	-4.1	4e-05	0.16	SCD	iso	ENST00000370751.10_2	IFI44L	IFI44L-201	protein_coding
19	-1.1	0.36	-3.1	0.0021	0.49	SCD	iso	ENST00000476876.5_1	IFI44L	IFI44L-208	protein_coding
23	-1.2	0.3	-4.2	3.1e-05	0.14	SCD	iso	ENST00000494910.1_1	IFI44L	IFI44L-210	protein_coding
440	-0.85	0.24	-3.6	0.00034	0.31	SCD	iso	ENST00000370747.9_2	IFI44	IFI44-201	protein_coding
21	-0.71	0.3	-2.4	0.018	0.86	SCD	iso	ENST00000446486.1_1	IFI44	IFI44-203	protein_coding
44	-0.77	0.23	-3.4	0.00071	0.37	SCD	iso	ENST00000476911.1_1	IFI44	IFI44-207	protein_coding
23	-0.7	0.27	-2.6	0.0097	0.74	SCD	iso	ENST00000485662.1_1	IFI44	IFI44-208	protein_coding
59	-0.94	0.3	-3.1	0.0017	0.48	SCD	iso	ENST00000495254.5_1	IFI44	IFI44-209	protein_coding
23	-0.85	0.39	-2.2	0.028	0.89	SCD	iso	ENST00000398529.7_2	RAB1A	RAB1A-201	protein_coding
820	0.42	0.2	2.1	0.035	0.9	SCD	iso	ENST00000372360.9_3	RPS24	RPS24-202	protein_coding
1400	-0.58	0.18	-3.2	0.0015	0.48	SCD	iso	ENST00000264350.8_2	HERC5	HERC5-201	protein_coding
110	-0.96	0.4	-2.4	0.015	0.86	SCD	iso	ENST00000508159.1_1	HERC5	HERC5-203	protein_coding
65	0.53	0.19	2.8	0.0048	0.64	SCD	iso	ENST00000512151.5_2	NUP54	NUP54-211	protein_coding
16	0.4	0.15	2.6	0.0084	0.7	SCD	iso	ENST00000526398.1_2	POLG	POLG-204	protein_coding
27	-0.42	0.12	-3.5	0.00049	0.35	SCD	iso	ENST00000566965.5_1	RHOT2	RHOT2-215	protein_coding
15	-0.43	0.21	-2.1	0.037	0.91	SCD	iso	ENST00000567589.1_1	RHOT2	RHOT2-217	protein_coding
47	0.67	0.29	2.3	0.021	0.86	SCD	iso	ENST00000588745.5_1	SMAD4	SMAD4-205	protein_coding
25	0.44	0.22	2	0.046	0.93	SCD	iso	ENST00000589363.5_3	SLC39A3	SLC39A3-205	protein_coding
66	0.5	0.23	2.1	0.033	0.9	SCD	iso	ENST00000368322.7_2	RIT1	RIT1-201	protein_coding
130	0.5	0.21	2.4	0.016	0.86	SCD	iso	ENST00000470936.1_1	ARL6IP5	ARL6IP5-202	protein_coding
65	0.55	0.23	2.4	0.019	0.86	SCD	iso	ENST00000515395.5_3	SSBP2	SSBP2-219	protein_coding
23	0.44	0.18	2.5	0.013	0.82	SCD	iso	ENST00000276585.9_3	MRPS28	MRPS28-201	protein_coding
16	0.42	0.2	2.1	0.033	0.9	SCD	iso	ENST00000519120.1_4	MRPS28	MRPS28-204	protein_coding
120	-0.38	0.18	-2.1	0.032	0.9	SCD	iso	ENST00000645398.1_2	CEP78	CEP78-220	protein_coding
500	-0.61	0.23	-2.7	0.0075	0.68	SCD	iso	ENST00000277480.7_4	LCN2	LCN2-201	protein_coding
36	0.41	0.19	2.1	0.033	0.9	SCD	iso	ENST00000525063.2_2	ADM	ADM-203	protein_coding
630	-0.54	0.2	-2.7	0.0062	0.66	SCD	iso	ENST00000278407.9_2	SERPING1	SERPING1-201	protein_coding
33	-0.58	0.18	-3.1	0.0017	0.48	SCD	iso	ENST00000457869.1_1	SERPING1	SERPING1-207	protein_coding
130	-0.54	0.2	-2.7	0.0064	0.67	SCD	iso	ENST00000531133.5_1	SERPING1	SERPING1-210	protein_coding
10	-0.53	0.27	-2	0.046	0.93	SCD	iso	ENST00000524988.1_1	SIDT2	SIDT2-205	protein_coding
18	-0.67	0.29	-2.3	0.022	0.87	SCD	iso	ENST00000537272.6_2	LTO1	LTO1-207	protein_coding
47	0.51	0.2	2.6	0.01	0.77	SCD	iso	ENST00000504148.3_5	TIMM8B	TIMM8B-201	protein_coding
110	-0.49	0.16	-3	0.0028	0.53	SCD	iso	ENST00000371930.5_3	ANKRD22	ANKRD22-201	protein_coding
9.6	-0.44	0.22	-2	0.043	0.92	SCD	iso	ENST00000518285.1_2	FAM49B	FAM49B-207	protein_coding
91	-0.55	0.19	-3	0.0031	0.54	SCD	iso	ENST00000413052.6_1	MOV10	MOV10-204	protein_coding
5800	0.49	0.14	3.4	0.00061	0.36	SCD	iso	ENST00000488500.1_2	EEF1A1	EEF1A1-206	protein_coding
5300	-0.56	0.17	-3.3	0.00098	0.41	SCD	iso	ENST00000398598.8_3	MX1	MX1-202	protein_coding
11	-0.97	0.49	-2	0.048	0.93	SCD	iso	ENST00000441677.5_3	MX1	MX1-209	protein_coding
25	-0.87	0.27	-3.3	0.0011	0.43	SCD	iso	ENST00000467510.1_1	MX1	MX1-211	protein_coding
61	-0.5	0.18	-2.8	0.0055	0.65	SCD	iso	ENST00000486275.1_1	MX1	MX1-215	protein_coding
18	-0.71	0.21	-3.3	0.00085	0.39	SCD	iso	ENST00000491110.1_1	MX1	MX1-217	protein_coding
47	-0.42	0.19	-2.2	0.026	0.88	SCD	iso	ENST00000543608.5_2	SPPL3	SPPL3-207	protein_coding
7.7	-0.38	0.19	-2.1	0.039	0.91	SCD	iso	ENST00000582826.5_2	ARHGAP27	ARHGAP27-218	protein_coding
3.3	0.53	0.18	2.9	0.0037	0.59	SCD	iso	ENST00000495475.1_2	MCM3AP	MCM3AP-209	protein_coding
3700	-0.48	0.15	-3.2	0.0016	0.48	SCD	iso	ENST00000292494.11_5	LY6E	LY6E-201	protein_coding
1200	-0.41	0.15	-2.8	0.0056	0.65	SCD	iso	ENST00000429120.6_4	LY6E	LY6E-202	protein_coding
12	-1	0.5	-2.1	0.036	0.91	SCD	iso	ENST00000519611.5_1	LY6E	LY6E-205	protein_coding
17	-0.43	0.18	-2.4	0.016	0.86	SCD	iso	ENST00000591084.5_4	U2AF1L4	U2AF1L4-216	protein_coding
86	-0.47	0.23	-2.1	0.037	0.91	SCD	iso	ENST00000648227.1_1	AMDHD2	AMDHD2-219	protein_coding
45	0.4	0.17	2.3	0.023	0.87	SCD	iso	ENST00000392220.2_2	PEX19	PEX19-202	protein_coding
22	0.47	0.13	3.7	0.0002	0.29	SCD	iso	ENST00000420201.5_1	ARPC2	ARPC2-205	protein_coding
2500	0.41	0.2	2	0.043	0.92	SCD	iso	ENST00000295955.13_4	RPL9	RPL9-201	protein_coding
22	0.8	0.41	2	0.05	0.93	SCD	iso	ENST00000437992.2_2	RPL9	RPL9-202	protein_coding
18	0.64	0.3	2.2	0.031	0.9	SCD	iso	ENST00000645585.1_2	RPL9	RPL9-215	protein_coding
85	0.77	0.37	2.1	0.038	0.91	SCD	iso	ENST00000520420.5_1	CREBRF	CREBRF-203	protein_coding
28	0.45	0.2	2.2	0.025	0.87	SCD	iso	ENST00000521320.1_2	SLU7	SLU7-207	protein_coding
110	0.41	0.15	2.7	0.0061	0.66	SCD	iso	ENST00000494313.2_3	AQP3	AQP3-205	protein_coding
3.3	-0.44	0.21	-2.1	0.039	0.91	SCD	iso	ENST00000543234.1_3	INPPL1	INPPL1-214	protein_coding
95	0.41	0.19	2.1	0.032	0.9	SCD	iso	ENST00000556018.5_2	TC2N	TC2N-206	protein_coding
51	-1.4	0.31	-4.6	4.3e-06	0.052	SCD	iso	ENST00000618863.1_3	IFI27	IFI27-212	protein_coding
27	-1.9	0.41	-4.7	3.1e-06	0.052	SCD	iso	ENST00000621160.4_2	IFI27	IFI27-215	protein_coding
62	-0.41	0.13	-3.1	0.0018	0.48	SCD	iso	ENST00000300093.9_2	PLK1	PLK1-201	protein_coding
140	0.53	0.17	3.1	0.0016	0.48	SCD	iso	ENST00000479421.5_2	YWHAB	YWHAB-206	protein_coding
16	-0.64	0.28	-2.3	0.02	0.86	SCD	iso	ENST00000597887.5_1	NIBAN3	NIBAN3-206	protein_coding
23	-0.52	0.22	-2.4	0.016	0.86	SCD	iso	ENST00000566636.5_2	MVD	MVD-213	protein_coding
180	0.55	0.22	2.4	0.014	0.84	SCD	iso	ENST00000391728.8_1	KIR3DL1	KIR3DL1-203	protein_coding
250	-0.63	0.24	-2.7	0.008	0.7	SCD	iso	ENST00000252244.3_3	KRT1	KRT1-201	protein_coding
67	-0.55	0.14	-4	7.3e-05	0.24	SCD	iso	ENST00000301634.12_3	TK1	TK1-201	protein_coding
380	-0.55	0.19	-3	0.0031	0.54	SCD	iso	ENST00000301887.9_3	BATF2	BATF2-201	protein_coding
38	0.41	0.12	3.3	0.00092	0.4	SCD	iso	ENST00000577185.1_1	TTC39C	TTC39C-204	protein_coding
26	-0.63	0.31	-2	0.046	0.93	SCD	iso	ENST00000565845.5_3	ATXN2L	ATXN2L-217	protein_coding
45	0.41	0.2	2.1	0.039	0.91	SCD	iso	ENST00000502632.5_2	HNRNPH1	HNRNPH1-205	protein_coding
38	0.45	0.23	2	0.045	0.93	SCD	iso	ENST00000505986.5_1	PGM2	PGM2-202	protein_coding
840	0.47	0.21	2.3	0.024	0.87	SCD	iso	ENST00000394949.8_2	SIN3A	SIN3A-203	protein_coding
170	0.4	0.14	2.8	0.0058	0.66	SCD	iso	ENST00000467648.6_3	UGP2	UGP2-207	protein_coding
21	-0.44	0.13	-3.3	0.00089	0.39	SCD	iso	ENST00000557156.1_2	STAT2	STAT2-208	protein_coding
49	0.64	0.31	2.1	0.036	0.9	SCD	iso	ENST00000357996.4_2	FEZ2	FEZ2-202	protein_coding
39	0.67	0.34	2	0.047	0.93	SCD	iso	ENST00000471877.5_1	ATP6V0E2	ATP6V0E2-206	protein_coding
63	0.59	0.25	2.4	0.017	0.86	SCD	iso	ENST00000469207.5_2	HDAC3	HDAC3-204	protein_coding
12	-0.54	0.28	-2	0.05	0.93	SCD	iso	ENST00000485717.1_1	RRM2	RRM2-208	protein_coding
15	-0.59	0.3	-2	0.05	0.93	SCD	iso	ENST00000546241.1_3	C3AR1	C3AR1-202	protein_coding
310	-0.77	0.29	-2.6	0.0084	0.7	SCD	iso	ENST00000460683.1_2	PARP14	PARP14-201	protein_coding
180	-0.67	0.2	-3.3	0.001	0.43	SCD	iso	ENST00000474669.1_1	PARP14	PARP14-203	protein_coding
3400	-0.39	0.11	-3.7	0.00024	0.29	SCD	iso	ENST00000649945.1_1	PARP14	PARP14-207	protein_coding
72	-0.58	0.27	-2.1	0.032	0.9	SCD	iso	ENST00000533465.1_1	EHBP1L1	EHBP1L1-210	protein_coding
36	0.69	0.29	2.4	0.017	0.86	SCD	iso	ENST00000505314.2_3	SRP72	SRP72-202	protein_coding
71	0.48	0.17	2.9	0.0038	0.6	SCD	iso	ENST00000311330.4_2	CD248	CD248-201	protein_coding
29	-0.4	0.17	-2.3	0.022	0.87	SCD	iso	ENST00000356455.9_2	UBE2C	UBE2C-204	protein_coding
20	0.47	0.2	2.3	0.021	0.87	SCD	iso	ENST00000418450.5_2	PARL	PARL-204	protein_coding
49	0.41	0.18	2.4	0.019	0.86	SCD	iso	ENST00000321280.11_2	BAIAP2	BAIAP2-201	protein_coding
150	0.47	0.18	2.6	0.0098	0.75	SCD	iso	ENST00000578692.1_2	CRLF3	CRLF3-203	protein_coding
21	0.43	0.22	2	0.048	0.93	SCD	iso	ENST00000508609.5_1	RUFY1	RUFY1-211	protein_coding
81	-0.58	0.16	-3.7	0.00021	0.29	SCD	iso	ENST00000323274.15_2	TYMS	TYMS-203	protein_coding
2600	-0.41	0.12	-3.4	0.00061	0.36	SCD	iso	ENST00000318238.9_3	SAMD9L	SAMD9L-201	protein_coding
100	0.42	0.17	2.5	0.013	0.82	SCD	iso	ENST00000511227.5_1	ACAD9	ACAD9-206	protein_coding
27	0.66	0.33	2	0.044	0.92	SCD	iso	ENST00000536938.1_2	ASB8	ASB8-206	protein_coding
86	-0.47	0.23	-2	0.043	0.92	SCD	iso	ENST00000329363.8_2	ODF3B	ODF3B-201	protein_coding
160	-0.43	0.12	-3.7	0.00023	0.29	SCD	iso	ENST00000401779.5_2	ODF3B	ODF3B-202	protein_coding
95	-0.39	0.19	-2	0.042	0.92	SCD	iso	ENST00000428989.2_2	ODF3B	ODF3B-205	protein_coding
12	-0.58	0.19	-3	0.0029	0.54	SCD	iso	ENST00000471448.2_2	ZFAND2A	ZFAND2A-204	protein_coding
96	0.4	0.19	2.1	0.036	0.91	SCD	iso	ENST00000394221.3_3	DHFR2	DHFR2-202	protein_coding
180	-0.52	0.2	-2.6	0.01	0.78	SCD	iso	ENST00000527194.5_1	GRINA	GRINA-204	protein_coding
16	0.9	0.34	2.6	0.0087	0.72	SCD	iso	ENST00000507420.1_1	MRFAP1	MRFAP1-203	protein_coding
33	-0.49	0.17	-2.9	0.0036	0.58	SCD	iso	ENST00000563536.1_2	EXOC3L1	EXOC3L1-204	protein_coding
290	0.42	0.15	2.7	0.0074	0.68	SCD	iso	ENST00000368115.5_1	FCER1A	FCER1A-202	protein_coding
44	-0.5	0.23	-2.2	0.028	0.89	SCD	iso	ENST00000326245.4_3	ITLN1	ITLN1-201	protein_coding
510	-0.38	0.17	-2.2	0.029	0.9	SCD	iso	ENST00000322444.7_2	KCTD2	KCTD2-201	protein_coding
710	-0.49	0.13	-3.7	0.00021	0.29	SCD	iso	ENST00000510590.1_2	DDX60L	DDX60L-208	protein_coding
12	0.38	0.11	3.5	0.00042	0.31	SCD	iso	ENST00000559125.1_1	MRPS11	MRPS11-206	protein_coding
29	-0.5	0.23	-2.2	0.029	0.9	SCD	iso	ENST00000565902.1_1	ADGRG3	ADGRG3-204	protein_coding
24	-0.38	0.12	-3.2	0.0016	0.48	SCD	iso	ENST00000490198.5_1	MTA1	MTA1-213	protein_coding
50	-0.4	0.18	-2.3	0.021	0.87	SCD	iso	ENST00000496774.5_1	MX2	MX2-213	protein_coding
16	-0.43	0.19	-2.3	0.023	0.87	SCD	iso	ENST00000481921.5_2	PSMG1	PSMG1-205	protein_coding
75	-0.42	0.2	-2.1	0.035	0.9	SCD	iso	ENST00000392554.7_1	BTBD6	BTBD6-203	protein_coding
170	-0.58	0.17	-3.3	0.00082	0.38	SCD	iso	ENST00000215794.8_2	USP18	USP18-201	protein_coding
11	-0.47	0.15	-3.1	0.0021	0.49	SCD	iso	ENST00000575078.5_3	HGS	HGS-213	protein_coding
60	0.44	0.19	2.4	0.017	0.86	SCD	iso	ENST00000550502.1_1	METTL7A	METTL7A-205	protein_coding
79	-0.7	0.22	-3.1	0.0018	0.48	SCD	iso	ENST00000532788.1_2	IRF7	IRF7-213	protein_coding
33	-0.42	0.13	-3.4	0.0007	0.37	SCD	iso	ENST00000533190.1_2	IRF7	IRF7-215	protein_coding
2300	-0.67	0.23	-2.9	0.0035	0.56	SCD	iso	ENST00000371804.4_2	IFIT1	IFIT1-201	protein_coding
19	-0.46	0.15	-3	0.0025	0.53	SCD	iso	ENST00000486728.5_2	TNFRSF18	TNFRSF18-204	protein_coding
250	0.66	0.17	3.9	9.7e-05	0.25	SCD	iso	ENST00000468027.5_1	PTMA	PTMA-211	protein_coding
2000	-0.68	0.19	-3.6	0.00034	0.31	SCD	iso	ENST00000649529.1_2	ISG15	ISG15-203	protein_coding
240	-0.5	0.14	-3.6	0.00034	0.31	SCD	iso	ENST00000379370.7_2	AGRN	AGRN-201	protein_coding
120	-0.38	0.15	-2.5	0.013	0.82	SCD	iso	ENST00000342435.9_3	PLSCR1	PLSCR1-201	protein_coding
340	-0.39	0.1	-3.8	0.00014	0.26	SCD	iso	ENST00000448787.6_4	PLSCR1	PLSCR1-202	protein_coding
60	-0.59	0.18	-3.3	0.0011	0.43	SCD	iso	ENST00000463777.5_2	PLSCR1	PLSCR1-204	protein_coding
54	-0.64	0.3	-2.2	0.029	0.9	SCD	iso	ENST00000468985.5_2	PLSCR1	PLSCR1-205	protein_coding
18	-0.46	0.16	-2.9	0.0041	0.62	SCD	iso	ENST00000483300.5_2	PLSCR1	PLSCR1-211	protein_coding
14	-0.53	0.17	-3.1	0.002	0.49	SCD	iso	ENST00000484560.1_2	PLSCR1	PLSCR1-212	protein_coding
340	-0.43	0.11	-3.9	8.9e-05	0.25	SCD	iso	ENST00000494568.5_2	PLSCR1	PLSCR1-219	protein_coding
440	0.98	0.33	3	0.0029	0.54	SCD	iso	ENST00000466340.1_2	SELL	SELL-204	protein_coding
390	0.39	0.18	2.2	0.025	0.87	SCD	iso	ENST00000399494.5_2	HMGB1	HMGB1-205	protein_coding
110	-0.39	0.14	-2.8	0.0055	0.65	SCD	iso	ENST00000360760.9_2	SPATS2L	SPATS2L-202	protein_coding
12	-0.4	0.2	-2	0.047	0.93	SCD	iso	ENST00000601978.1_1	SUPT5H	SUPT5H-220	protein_coding
480	-0.51	0.23	-2.2	0.03	0.9	SCD	iso	ENST00000645323.1_2	CD55	CD55-214	protein_coding
10	-0.42	0.21	-2	0.046	0.93	SCD	iso	ENST00000483055.1_1	NTNG2	NTNG2-203	protein_coding
5400	-1.3	0.38	-3.4	0.00067	0.37	SCD	iso	ENST00000336906.6_5	HBG2	HBG2-201	protein_coding
140	-0.57	0.18	-3.2	0.0014	0.48	SCD	iso	ENST00000394465.2	CCL4L2	CCL4L2-001	protein_coding
18	0.48	0.19	2.5	0.013	0.82	SCD	iso	ENST00000463058.5_1	HHLA3	HHLA3-204	protein_coding
16	-0.49	0.25	-2	0.05	0.93	SCD	iso	ENST00000526341.5_1	GPAA1	GPAA1-207	protein_coding
26	-0.39	0.15	-2.7	0.0067	0.68	SCD	iso	ENST00000466915.1	FCGR1B	FCGR1B-004	protein_coding
73	0.48	0.2	2.4	0.015	0.86	SCD	iso	ENST00000596652.5_2	ZNF544	ZNF544-206	protein_coding
120	0.39	0.17	2.3	0.019	0.86	SCD	iso	ENST00000494347.5_2	OGA	OGA-211	protein_coding
150	-0.38	0.17	-2.3	0.024	0.87	SCD	iso	ENST00000361871.7_4	MSRB1	MSRB1-201	protein_coding
23	0.74	0.32	2.3	0.02	0.86	SCD	iso	ENST00000299468.11_1	PCMTD2	PCMTD2-202	protein_coding
420	-0.46	0.23	-2	0.047	0.93	SCD	iso	ENST00000652259.1_2	TAP2	TAP2-205	protein_coding
23	0.55	0.28	2	0.048	0.93	SCD	iso	ENST00000614349.4_3	SDHD	SDHD-209	protein_coding
350	-0.46	0.24	-2	0.05	0.93	SCD	iso	ENST00000618265.5_2	CD177	CD177-203	protein_coding
15	0.39	0.18	2.2	0.028	0.89	SCD	iso	ENST00000380751.9_3	SERF1B	SERF1B-202	protein_coding
51	-0.55	0.17	-3.2	0.0012	0.46	SCD	iso	ENST00000390285.4_2	IGLV6-57	IGLV6-57-201	protein_coding
78	-0.81	0.3	-2.7	0.0076	0.68	SCD	iso	ENST00000390296.2_1	IGLV5-45	IGLV5-45-201	protein_coding
180	-0.48	0.21	-2.3	0.021	0.86	SCD	iso	ENST00000390309.2_1	IGLV3-19	IGLV3-19-201	protein_coding
58	-0.53	0.26	-2	0.041	0.92	SCD	iso	ENST00000390315.3_2	IGLV3-10	IGLV3-10-201	protein_coding
31	-0.56	0.26	-2.2	0.03	0.9	SCD	iso	ENST00000390316.2_2	IGLV3-9	IGLV3-9-201	protein_coding
170	0.59	0.19	3.1	0.0019	0.48	SCD	iso	ENST00000444775.2_2	TRGV9	TRGV9-201	protein_coding
33	0.49	0.19	2.6	0.0084	0.7	SCD	iso	ENST00000390344.2_5	TRGV5	TRGV5-201	protein_coding
43	0.5	0.19	2.6	0.0089	0.73	SCD	iso	ENST00000390345.2_4	TRGV4	TRGV4-201	protein_coding
25	0.4	0.16	2.5	0.013	0.82	SCD	iso	ENST00000390371.3_4	TRBV6-6	TRBV6-6-201	protein_coding
18	0.43	0.15	2.9	0.0039	0.6	SCD	iso	ENST00000390372.3_2	TRBV5-5	TRBV5-5-201	protein_coding
9.6	1	0.3	3.4	0.00067	0.37	SCD	iso	ENST00000390460.1_1	TRAV26-2	TRAV26-2-201	protein_coding
130	0.77	0.29	2.7	0.0075	0.68	SCD	iso	ENST00000390469.2_1	TRDV2	TRDV2-201	protein_coding
58	0.59	0.19	3.1	0.002	0.49	SCD	iso	ENST00000390541.2_3	IGHE	IGHE-201	protein_coding
99	-0.39	0.18	-2.2	0.026	0.88	SCD	iso	ENST00000390597.3_5	IGHV2-5	IGHV2-5-201	protein_coding
97	-0.43	0.18	-2.4	0.015	0.86	SCD	iso	ENST00000390598.2_4	IGHV3-7	IGHV3-7-201	protein_coding
7.1	-0.73	0.27	-2.7	0.0061	0.66	SCD	iso	ENST00000390606.3_6	IGHV3-20	IGHV3-20-201	protein_coding
340	-0.74	0.21	-3.6	0.00033	0.31	SCD	iso	ENST00000390609.3_4	IGHV3-23	IGHV3-23-201	protein_coding
130	-0.57	0.26	-2.2	0.028	0.89	SCD	iso	ENST00000390615.2_2	IGHV3-33	IGHV3-33-201	protein_coding
16	-0.44	0.2	-2.2	0.028	0.89	SCD	iso	ENST00000390624.3_2	IGHV3-48	IGHV3-48-201	protein_coding
46	-0.55	0.25	-2.2	0.026	0.88	SCD	iso	ENST00000390625.3_3	IGHV3-49	IGHV3-49-201	protein_coding
160	-0.71	0.32	-2.2	0.027	0.88	SCD	iso	ENST00000396832.6_5	CSNK1E	CSNK1E-203	protein_coding
9.8	-0.77	0.28	-2.8	0.0057	0.65	SCD	iso	ENST00000438596.5_1	TTLL3	TTLL3-216	protein_coding
80	-0.78	0.27	-3	0.0031	0.54	SCD	iso	ENST00000530217.2_2	NPIPA7	NPIPA7-202	protein_coding
85	0.59	0.28	2.1	0.034	0.9	SCD	iso	ENST00000395550.7_3	SLC26A6	SLC26A6-205	protein_coding
150	0.72	0.17	4.3	1.5e-05	0.1	SCD	iso	ENST00000455382.2_3	TRBV2	TRBV2-201	protein_coding
71	0.46	0.14	3.3	0.0011	0.43	SCD	iso	ENST00000390359.3	TRBV7-8	TRBV7-8-001	protein_coding
60	0.52	0.15	3.6	0.00038	0.31	SCD	iso	ENST00000417977.2_2	TRBV30	TRBV30-201	protein_coding
390	-0.42	0.18	-2.4	0.017	0.86	SCD	iso	ENST00000360358.3_2	OR2W3	OR2W3-201	protein_coding
23	-0.41	0.15	-2.8	0.0056	0.65	SCD	iso	ENST00000470536.5_1	WBP1	WBP1-208	protein_coding
54	-0.69	0.31	-2.3	0.024	0.87	SCD	iso	ENST00000380259.7_4	AC104389.5	AC104389.5-201	protein_coding
73	-0.45	0.21	-2.1	0.034	0.9	SCD	iso	ENST00000261652.7_2	TNFRSF13B	TNFRSF13B-201	protein_coding
100	-0.45	0.19	-2.3	0.019	0.86	SCD	iso	ENST00000479981.1_4	IGKV1-16	IGKV1-16-201	protein_coding
7.1	-0.66	0.32	-2	0.042	0.92	SCD	iso	ENST00000558026.1_3	IGKV2D-28	IGKV2D-28-202	protein_coding
170	-0.43	0.22	-2	0.047	0.93	SCD	iso	ENST00000482769.1_3	IGKV2-28	IGKV2-28-201	protein_coding
61	0.39	0.19	2.1	0.038	0.91	SCD	iso	ENST00000511143.5_2	N4BP2L2	N4BP2L2-214	protein_coding
88	-0.79	0.2	-3.9	0.00011	0.26	SCD	iso	ENST00000503771.2_2	TMEM158	TMEM158-201	protein_coding
290	-0.48	0.17	-2.9	0.0039	0.6	SCD	iso	ENST00000526893.6_2	IGLL5	IGLL5-201	protein_coding
35	-0.85	0.29	-2.9	0.0036	0.58	SCD	iso	ENST00000531372.1_3	IGLL5	IGLL5-202	protein_coding
9.3	-0.45	0.21	-2.1	0.033	0.9	SCD	iso	ENST00000535903.1_1	CLEC12B	CLEC12B-203	protein_coding
9.8	-0.84	0.35	-2.4	0.017	0.86	SCD	iso	ENST00000568417.2	HP	HP-018	protein_coding
17	0.45	0.21	2.1	0.032	0.9	SCD	iso	ENST00000548752.6_1	CHURC1	CHURC1-202	protein_coding
9.8	-0.42	0.2	-2.1	0.038	0.91	SCD	iso	ENST00000557168.1_3	TRAV30	TRAV30-201	protein_coding
17	0.62	0.21	3	0.0029	0.54	SCD	iso	ENST00000619462.4_2	CWC25	CWC25-205	protein_coding
250	-0.59	0.25	-2.4	0.016	0.86	SCD	iso	ENST00000620395.2_4	IGLV2-8	IGLV2-8-201	protein_coding

## Sheet: Table S2
Table S2. Enriched pathways of differentially expressed genes and isoforms
term.id	term.name	domain	term.size	query.size	overlap.size	intersection	p.value	group	direction
GO:0015931	nucleobase-containing compound transport	BP	236	130	9	RIOK2,QKI,SLC35B1,HNRNPA2B1,PCID2,SLC35D2,NUP54,MCM3AP,SLU7	0.0379	SCD	upregulated
GO:0043312	neutrophil degranulation	BP	484	130	14	LYZ,CPPED1,HSPA8,LRMP,RAP1B,CAP1,CHI3L1,TLR2,SDCBP,EEF1A1,PGM2,METTL7A,SELL,HMGB1	0.00565	SCD	upregulated
GO:0006612	protein targeting to membrane	BP	168	130	8	RPL31,RPL34,RPL21,SDCBP,RPS24,PEX19,RPL9,SRP72	0.0219	SCD	upregulated
GO:0006614	SRP-dependent cotranslational protein targeting to membrane	BP	92	130	6	RPL31,RPL34,RPL21,RPS24,RPL9,SRP72	0.0447	SCD	upregulated
GO:0006605	protein targeting	BP	393	130	15	RPL31,RPL34,HSPA8,RPL21,AP4B1,TIMM17A,SDCBP,RPS24,NUP54,TIMM8B,PEX19,RPL9,YWHAB,SRP72,PARL	7.44e-05	SCD	upregulated
REAC:R-HSA-6798695	Neutrophil degranulation	rea	476	92	14	LYZ,CPPED1,HSPA8,LRMP,RAP1B,CAP1,CHI3L1,TLR2,SDCBP,EEF1A1,PGM2,METTL7A,SELL,HMGB1	0.0127	SCD	upregulated
REAC:R-HSA-156842	Eukaryotic Translation Elongation	rea	94	92	7	RPL31,EEF1D,RPL34,RPL21,RPS24,EEF1A1,RPL9	0.00364	SCD	upregulated
GO:0006898	receptor-mediated endocytosis	BP	325	170	18	TNK2,APOL1,JCHAIN,CD63,ARHGAP27,FCGR1B,IGLV6-57,IGLV3-19,IGHV2-5,IGHV3-7,IGHV3-23,IGHV3-33,IGHV3-48,IGKV1-16,IGKV2D-28,IGKV2-28,HP,IGLV2-8	7.72e-07	SCD	downregulated
GO:0030449	regulation of complement activation	BP	105	170	15	CD46,SERPING1,C3AR1,CD55,IGLV6-57,IGLV3-19,IGHV2-5,IGHV3-7,IGHV3-23,IGHV3-33,IGHV3-48,IGKV1-16,IGKV2D-28,IGKV2-28,IGLV2-8	2.76e-11	SCD	downregulated
GO:0043312	neutrophil degranulation	BP	484	170	20	TYROBP,LTF,CRISP3,BPI,OLFM4,KPNB1,HSPA8,FOLR3,MMP8,ARG1,TNFAIP6,CHIT1,CD63,LCN2,KRT1,C3AR1,ADGRG3,CD55,CD177,HP	1.28e-05	SCD	downregulated
GO:0002768	immune response-regulating cell surface receptor signaling pathway	BP	412	170	21	GBP1,THEMIS2,SPPL3,C3AR1,PLSCR1,FCGR1B,IGLV6-57,IGLV3-19,IGHV2-5,IGHV3-7,IGHV3-20,IGHV3-23,IGHV3-33,IGHV3-48,IGHV3-49,IGKV1-16,IGKV2D-28,IGKV2-28,IGLL5,CLEC12B,IGLV2-8	1.19e-07	SCD	downregulated
GO:0006956	complement activation	BP	166	170	19	CD46,SERPING1,KRT1,C3AR1,CD55,IGLV6-57,IGLV3-19,IGHV2-5,IGHV3-7,IGHV3-20,IGHV3-23,IGHV3-33,IGHV3-48,IGHV3-49,IGKV1-16,IGKV2D-28,IGKV2-28,IGLL5,IGLV2-8	5.41e-13	SCD	downregulated
GO:0006958	complement activation, classical pathway	BP	133	170	17	CD46,SERPING1,CD55,IGLV6-57,IGLV3-19,IGHV2-5,IGHV3-7,IGHV3-20,IGHV3-23,IGHV3-33,IGHV3-48,IGHV3-49,IGKV1-16,IGKV2D-28,IGKV2-28,IGLL5,IGLV2-8	3.17e-12	SCD	downregulated
GO:0045071	negative regulation of viral genome replication	BP	53	170	10	LTF,EIF2AK2,OAS1,OAS3,RSAD2,OASL,MX1,IFIT1,ISG15,PLSCR1	3.92e-08	SCD	downregulated
GO:0050900	leukocyte migration	BP	464	170	16	JCHAIN,C3AR1,TNFRSF18,CD177,IGLV6-57,IGLV3-19,IGHV2-5,IGHV3-7,IGHV3-23,IGHV3-33,IGHV3-48,IGKV1-16,IGKV2D-28,IGKV2-28,CCL4L2,IGLV2-8	0.00457	SCD	downregulated
GO:0038096	Fc-gamma receptor signaling pathway involved in phagocytosis	BP	128	170	11	IGLV6-57,IGLV3-19,IGHV2-5,IGHV3-7,IGHV3-23,IGHV3-33,IGHV3-48,IGKV1-16,IGKV2D-28,IGKV2-28,IGLV2-8	2.3e-05	SCD	downregulated
GO:0051607	defense response to virus	BP	223	170	20	EIF2AK2,OAS1,OAS3,OAS2,STAT1,GBP1,IFIT3,IFIT2,TRIM22,RSAD2,OASL,IFI44L,HERC5,MX1,STAT2,MX2,IRF7,IFIT1,ISG15,PLSCR1	1.03e-11	SCD	downregulated
GO:0035455	response to interferon-alpha	BP	20	170	5	EIF2AK2,LAMP3,IFIT3,IFIT2,MX2	0.000946	SCD	downregulated
GO:0060337	type I interferon signaling pathway	BP	85	170	19	SP100,IFI35,OAS1,OAS3,OAS2,STAT1,IFIT3,IFIT2,IFI6,XAF1,RSAD2,OASL,MX1,STAT2,MX2,USP18,IRF7,IFIT1,ISG15	9.79e-19	SCD	downregulated
GO:0060333	interferon-gamma-mediated signaling pathway	BP	85	170	12	SP100,OAS1,OAS3,OAS2,STAT1,GBP1,ARG1,TRIM22,OASL,PARP14,IRF7,FCGR1B	1.41e-08	SCD	downregulated
KEGG:05162	Measles	keg	131	73	11	EIF2AK2,OAS1,HSPA8,OAS3,OAS2,STAT1,CD46,TNFSF10,MX1,STAT2,IRF7	4.67e-06	SCD	downregulated
KEGG:05160	Hepatitis C	keg	131	73	8	EIF2AK2,OAS1,OAS3,OAS2,STAT1,STAT2,IRF7,IFIT1	0.00353	SCD	downregulated
KEGG:05164	Influenza A	keg	169	73	12	EIF2AK2,OAS1,HSPA8,OAS3,OAS2,STAT1,TNFSF10,MAP2K2,RSAD2,MX1,STAT2,IRF7	7.23e-06	SCD	downregulated
KEGG:04621	NOD-like receptor signaling pathway	keg	167	73	8	OAS1,OAS3,OAS2,STAT1,GBP1,STAT2,IRF7,CARD17	0.0193	SCD	downregulated
KEGG:05168	Herpes simplex infection	keg	183	73	10	EIF2AK2,SP100,OAS1,OAS3,OAS2,STAT1,STAT2,IRF7,IFIT1,TAP2	0.000991	SCD	downregulated
REAC:R-HSA-977606	Regulation of Complement cascade	rea	101	120	15	CD46,SERPING1,C3AR1,CD55,IGLV6-57,IGLV3-19,IGHV2-5,IGHV3-7,IGHV3-23,IGHV3-33,IGHV3-48,IGKV1-16,IGKV2D-28,IGKV2-28,IGLV2-8	8.93e-11	SCD	downregulated
REAC:R-HSA-2029481	FCGR activation	rea	67	120	11	IGLV6-57,IGLV3-19,IGHV2-5,IGHV3-7,IGHV3-23,IGHV3-33,IGHV3-48,IGKV1-16,IGKV2D-28,IGKV2-28,IGLV2-8	4.74e-08	SCD	downregulated
REAC:R-HSA-2168880	Scavenging of heme from plasma	rea	67	120	14	APOL1,JCHAIN,IGLV6-57,IGLV3-19,IGHV2-5,IGHV3-7,IGHV3-23,IGHV3-33,IGHV3-48,IGKV1-16,IGKV2D-28,IGKV2-28,HP,IGLV2-8	3.98e-12	SCD	downregulated
REAC:R-HSA-909733	Interferon alpha/beta signaling	rea	68	120	18	IFI35,OAS1,OAS3,OAS2,STAT1,IFIT3,IFIT2,IFI6,XAF1,RSAD2,OASL,MX1,STAT2,MX2,USP18,IRF7,IFIT1,ISG15	5.16e-18	SCD	downregulated
REAC:R-HSA-6798695	Neutrophil degranulation	rea	476	120	20	TYROBP,LTF,CRISP3,BPI,OLFM4,KPNB1,HSPA8,FOLR3,MMP8,ARG1,TNFAIP6,CHIT1,CD63,LCN2,KRT1,C3AR1,ADGRG3,CD55,CD177,HP	8.73e-05	SCD	downregulated
REAC:R-HSA-2730905	Role of LAT2/NTAL/LAB on calcium mobilization	rea	66	120	11	IGLV6-57,IGLV3-19,IGHV2-5,IGHV3-7,IGHV3-23,IGHV3-33,IGHV3-48,IGKV1-16,IGKV2D-28,IGKV2-28,IGLV2-8	4e-08	SCD	downregulated
REAC:R-HSA-202733	Cell surface interactions at the vascular wall	rea	190	120	13	JCHAIN,CD177,IGLV6-57,IGLV3-19,IGHV2-5,IGHV3-7,IGHV3-23,IGHV3-33,IGHV3-48,IGKV1-16,IGKV2D-28,IGKV2-28,IGLV2-8	5.49e-05	SCD	downregulated
REAC:R-HSA-5690714	CD22 mediated BCR regulation	rea	59	120	11	IGLV6-57,IGLV3-19,IGHV2-5,IGHV3-7,IGHV3-23,IGHV3-33,IGHV3-48,IGKV1-16,IGKV2D-28,IGKV2-28,IGLV2-8	1.11e-08	SCD	downregulated
REAC:R-HSA-198933	Immunoregulatory interactions between a Lymphoid and a non-Lymphoid cell	rea	177	120	13	TYROBP,SIGLEC1,IGLV6-57,IGLV3-19,IGHV2-5,IGHV3-7,IGHV3-23,IGHV3-33,IGHV3-48,IGKV1-16,IGKV2D-28,IGKV2-28,IGLV2-8	2.39e-05	SCD	downregulated
REAC:R-HSA-156711	Polo-like kinase mediated events	rea	16	120	4	MYBL2,PKMYT1,CCNB1,PLK1	0.00645	SCD	downregulated
GO:0006909	phagocytosis	BP	329	76	9	SLC11A1,CNN2,PLCG1,TLR2,GATA2,IGHV1-2,IGHV3-11,IGHV2-70D,IGKV1D-12	0.00656	MCI	upregulated
GO:0002697	regulation of immune effector process	BP	413	76	9	PUM2,PTPRC,SEC14L1,GATA2,CD177,IGHV1-2,IGHV3-11,CLEC12B,IGKV1D-12	0.04	MCI	upregulated
REAC:R-HSA-2454202	Fc epsilon receptor (FCERI) signaling	rea	184	48	6	PLCG1,UBC,FCER1A,IGHV1-2,IGHV3-11,IGKV1D-12	0.0374	MCI	upregulated
GO:0006958	complement activation, classical pathway	BP	133	55	6	IGLV6-57,IGHV3-20,IGHV3-23,IGHV3-49,IGKV1D-16,IGLL5	0.00236	MCI	downregulated
GO:0050864	regulation of B cell activation	BP	167	55	6	SYK,IGHV3-20,IGHV3-23,IGHV3-49,TNFRSF13B,IGLL5	0.0088	MCI	downregulated
GO:0050853	B cell receptor signaling pathway	BP	103	55	5	SYK,IGHV3-20,IGHV3-23,IGHV3-49,IGLL5	0.0125	MCI	downregulated
GO:0006909	phagocytosis	BP	329	55	9	SH3BP1,SYK,RACK1,IGLV6-57,IGHV3-20,IGHV3-23,IGHV3-49,IGKV1D-16,IGLL5	0.00038	MCI	downregulated
GO:0006910	phagocytosis, recognition	BP	66	55	4	IGHV3-20,IGHV3-23,IGHV3-49,IGLL5	0.0427	MCI	downregulated
GO:0050871	positive regulation of B cell activation	BP	128	55	5	SYK,IGHV3-20,IGHV3-23,IGHV3-49,IGLL5	0.0359	MCI	downregulated
GO:0006911	phagocytosis, engulfment	BP	90	55	5	SH3BP1,IGHV3-20,IGHV3-23,IGHV3-49,IGLL5	0.00647	MCI	downregulated
REAC:R-HSA-2029481	FCGR activation	rea	67	32	4	SYK,IGLV6-57,IGHV3-23,IGKV1D-16	0.00866	MCI	downregulated
REAC:R-HSA-2730905	Role of LAT2/NTAL/LAB on calcium mobilization	rea	66	32	4	SYK,IGLV6-57,IGHV3-23,IGKV1D-16	0.00816	MCI	downregulated
REAC:R-HSA-983695	Antigen activates B Cell Receptor (BCR) leading to generation of second messengers	rea	89	32	4	SYK,IGLV6-57,IGHV3-23,IGKV1D-16	0.0263	MCI	downregulated
REAC:R-HSA-198933	Immunoregulatory interactions between a Lymphoid and a non-Lymphoid cell	rea	177	32	5	LILRB2,HLA-A,IGLV6-57,IGHV3-23,IGKV1D-16	0.0324	MCI	downregulated
GO:0032479	regulation of type I interferon production	BP	108	526	13	CYLD,DDX58,IFIH1,STAT1,TRIM25,NMI,ZBP1,IRF1,TLR2,HERC5,HMGB2,IRF7,PLCG2	0.0107	AD	upregulated
GO:0009615	response to virus	BP	309	526	40	BIRC3,IFNGR1,EIF2AK2,BCL3,PTPRC,OAS1,SAMHD1,BNIP3L,ZC3HAV1,DDX58,OAS3,OAS2,IFIH1,STAT1,LGALS8,GBP3,GBP1,IFIT3,IFIT2,TRIM25,NT5C3A,IRF1,GTF2F1,TRIM22,RSAD2,DDX60,IFI44L,IFI44,PARP9,HERC5,PMAIP1,IFIT5,MX1,AIM2,LGALS9,STAT2,APOBEC3B,MX2,IRF7,PLSCR1	2.73e-13	AD	upregulated
GO:0060759	regulation of response to cytokine stimulus	BP	163	526	16	BIRC3,IFNGR1,STAP1,PTPRC,CYLD,JAK2,DDX58,IFIH1,STAT1,TLR2,CASP1,PARP9,PARP14,USP18,IRF7,CARD16	0.0141	AD	upregulated
GO:0045088	regulation of innate immune response	BP	353	526	36	BIRC3,IFNGR1,FCGR2B,CEACAM1,CYLD,JAK2,COCH,SAMHD1,DDX58,IFIH1,STAT1,NMI,IRF1,RSAD2,TRAFD1,CD36,TLR2,DDX60,PARP9,ARRB2,S100A8,SERPING1,LY96,PIK3AP1,AIM2,HMGB2,CLEC4D,NOD2,LGALS9,PARP14,USP18,IRF7,TLR5,PLSCR1,HMGB1,PLCG2	1.28e-08	AD	upregulated
GO:2000116	regulation of cysteine-type endopeptidase activity	BP	241	526	19	BIRC3,FAS,LAMP3,JAK2,TNFSF10,MICAL1,MDM2,CASP1,ARRB2,PMAIP1,S100A8,TNFAIP8,AIM2,LGALS9,CYCS,HMGB1,ASPH,CARD16,NAIP	0.0495	AD	upregulated
GO:0071357	cellular response to type I interferon	BP	85	526	17	SP100,OAS1,SAMHD1,OAS3,OAS2,STAT1,IFIT3,IFIT2,IRF1,XAF1,RSAD2,MX1,GBP2,STAT2,MX2,USP18,IRF7	1.51e-07	AD	upregulated
GO:0001819	positive regulation of cytokine production	BP	403	526	30	BIRC3,EIF2AK2,BCL3,JAK2,DDX58,CD86,IFIH1,STAT1,ATF2,CD58,ZBP1,IRF1,RSAD2,CD36,TLR2,DDX60,CASP1,LY96,AIM2,HMGB2,B2M,NOD2,LGALS9,IRF7,FFAR3,TLR5,HMGB1,IL1RAP,PLCG2,MBP	0.000923	AD	upregulated
GO:0048024	regulation of mRNA splicing, via spliceosome	BP	78	526	13	RBM7,DDX5,SRSF3,TIA1,SRSF4,RBM25,HNRNPA2B1,TRA2B,HNRNPU,DYRK1A,SRSF2,HNRNPK,SRSF10	0.00024	AD	upregulated
GO:0042119	neutrophil activation	BP	497	526	33	GDI2,SLC2A3,FCGR2B,CEACAM1,PTPRC,SCAMP1,LAMTOR3,MANBA,HSPA8,FOLR3,GCA,CD58,LRMP,YPEL5,TNFAIP6,ATP8A1,GMFG,CD36,TMBIM1,TLR2,ANXA3,IQGAP1,CD53,FCGR2A,S100A8,IQGAP2,ALDOA,EEF1A1,CLEC4D,B2M,EEF2,FTH1,HMGB1	0.00325	AD	upregulated
GO:0031349	positive regulation of defense response	BP	407	526	30	BIRC3,STAP1,MEF2C,CYLD,MGST2,JAK2,COCH,DDX58,SNX4,IFIH1,IRF1,RSAD2,CD36,TLR2,DDX60,PARP9,ARRB2,S100A8,LY96,PIK3AP1,AIM2,HMGB2,CLEC4D,NOD2,IRF7,FFAR3,TLR5,PLSCR1,HMGB1,PLCG2	0.00114	AD	upregulated
GO:0060333	interferon-gamma-mediated signaling pathway	BP	85	526	19	IFNGR1,SP100,OAS1,JAK2,OAS3,OAS2,STAT1,GBP1,TRIM25,NMI,IRF1,TRIM22,PARP9,FCGR1A,GBP2,B2M,PARP14,IRF7,FCGR1B	1.43e-09	AD	upregulated
GO:0043900	regulation of multi-organism process	BP	370	526	27	BIRC3,EIF2AK2,PKN2,LAMP3,CHMP2B,OAS1,PPP2R3C,ZC3HAV1,DDX58,DDX5,OAS3,STAT1,CHMP3,TRIM25,RSAD2,CD36,DDX60,PARP9,HERC5,LHFPL2,IFIT5,LY96,MX1,AIM2,LGALS9,PLSCR1,CARD16	0.00493	AD	upregulated
GO:1903900	regulation of viral life cycle	BP	134	526	15	EIF2AK2,PKN2,LAMP3,CHMP2B,OAS1,ZC3HAV1,DDX5,OAS3,CHMP3,TRIM25,RSAD2,IFIT5,MX1,LGALS9,PLSCR1	0.00535	AD	upregulated
GO:0007249	I-kappaB kinase/NF-kappaB signaling	BP	247	526	20	BIRC3,BCL3,USP10,GOLT1B,STAT1,TRIM25,TNFSF10,TRIM22,CD36,TLR2,CASP1,IFIT5,LY96,SHISA5,NOD2,RHOH,LGALS9,AKAP13,C18ORF32,CARD16	0.0209	AD	upregulated
GO:0051769	regulation of nitric-oxide synthase biosynthetic process	BP	19	526	6	JAK2,NAMPT,STAT1,TLR2,PGGT1B,NOD2	0.0118	AD	upregulated
GO:0043312	neutrophil degranulation	BP	484	526	32	GDI2,SLC2A3,CEACAM1,PTPRC,SCAMP1,LAMTOR3,MANBA,HSPA8,FOLR3,GCA,CD58,LRMP,YPEL5,TNFAIP6,ATP8A1,GMFG,CD36,TMBIM1,TLR2,ANXA3,IQGAP1,CD53,FCGR2A,S100A8,IQGAP2,ALDOA,EEF1A1,CLEC4D,B2M,EEF2,FTH1,HMGB1	0.00508	AD	upregulated
KEGG:05162	Measles	keg	131	243	18	FAS,IFNGR1,EIF2AK2,FCGR2B,OAS1,JAK2,DDX58,HSPA8,OAS3,OAS2,IFIH1,STAT1,TNFSF10,STAT5A,TLR2,MX1,STAT2,IRF7	3.11e-05	AD	upregulated
KEGG:05164	Influenza A	keg	169	243	22	FAS,IFNGR1,EIF2AK2,OAS1,JAK2,DDX58,HSPA8,OAS3,OAS2,IFIH1,STAT1,ATF2,TRIM25,TNFSF10,RSAD2,CASP1,MX1,NXF1,STAT2,CYCS,AGFG1,IRF7	3.92e-06	AD	upregulated
KEGG:05168	Herpes simplex infection	keg	183	243	23	FAS,IFNGR1,TBPL1,EIF2AK2,SP100,OAS1,JAK2,DDX58,OAS3,OAS2,SRSF3,IFIH1,STAT1,SRSF4,TLR2,SRSF2,NXF1,HNRNPK,STAT2,CYCS,IRF7,TAF13,TAP2	3.71e-06	AD	upregulated
KEGG:03040	Spliceosome	keg	134	243	15	DDX5,EFTUD2,HSPA8,SRSF3,SRSF4,RBM25,SMNDC1,TRA2B,HNRNPU,SRSF2,TRA2A,HNRNPK,SNRPE,SRSF10,DHX16	0.00384	AD	upregulated
KEGG:04621	NOD-like receptor signaling pathway	keg	167	243	16	BIRC3,OAS1,NAMPT,OAS3,OAS2,STAT1,GBP3,GBP1,CASP1,GBP2,AIM2,NOD2,STAT2,IRF7,CARD16,NAIP	0.0141	AD	upregulated
KEGG:04217	Necroptosis	keg	162	243	17	BIRC3,FAS,IFNGR1,EIF2AK2,CYLD,CHMP2B,CHMP5,JAK2,STAT1,CHMP3,TNFSF10,ZBP1,STAT5A,CASP1,FTH1,STAT2,HMGB1	0.00274	AD	upregulated
REAC:R-HSA-6798695	Neutrophil degranulation	rea	476	333	31	GDI2,SLC2A3,CEACAM1,PTPRC,SCAMP1,LAMTOR3,MANBA,HSPA8,FOLR3,GCA,CD58,LRMP,YPEL5,TNFAIP6,ATP8A1,GMFG,CD36,TMBIM1,TLR2,IQGAP1,CD53,FCGR2A,S100A8,IQGAP2,ALDOA,EEF1A1,CLEC4D,B2M,EEF2,FTH1,HMGB1	0.0289	AD	upregulated
REAC:R-HSA-72163	mRNA Splicing - Major Pathway	rea	179	333	16	CASC3,DDX5,EFTUD2,HSPA8,SRSF3,SRSF4,SMNDC1,HNRNPA2B1,GTF2F1,TRA2B,HNRNPU,SRSF2,HNRNPK,SNRPE,SRSF10,DHX16	0.049	AD	upregulated
REAC:R-HSA-5686938	Regulation of TLR by endogenous ligand	rea	16	333	5	CD36,TLR2,S100A8,LY96,HMGB1	0.0293	AD	upregulated
REAC:R-HSA-913531	Interferon Signaling	rea	195	333	31	IFNGR1,EIF2AK2,SP100,OAS1,JAK2,SAMHD1,DDX58,OAS3,OAS2,STAT1,GBP3,GBP1,IFIT3,IFIT2,TRIM25,IRF1,TRIM22,XAF1,RSAD2,HERC5,FCGR1A,MX1,GBP2,ARIH1,B2M,UBE2E1,STAT2,MX2,USP18,IRF7,FCGR1B	1.88e-11	AD	upregulated
REAC:R-HSA-72649	Translation initiation complex formation	rea	59	261	8	RPS19,EIF4G1,RPS10,RPS3,EIF4A2,EIF4A1,RPS9,EIF3C	0.0256	AD	downregulated
REAC:R-HSA-1169410	Antiviral mechanism by IFN-stimulated genes	rea	73	261	9	AAAS,NUP98,EIF4G1,PLCG1,IRF3,NUP54,EIF4A2,EIF4A1,UBA7	0.02	AD	downregulated

## Sheet: Table S3
TableS3. Genes with differentially local splicing in SCD, MCI and AD compared with NC
clusterID	N	coord	gene	annotation	FDR	group
clu_45728_NA	12	chr18:11897355-11908200	MPPE1	cryptic	4.37e-19	SCD
clu_1086_NA	6	chr2:43444403-43453404	ZFP36L2	cryptic	9.96e-10	SCD
clu_36357_NA	7	chr19:18218428-18232495	MAST3	cryptic	4.58e-09	SCD
clu_69429_NA	7	chr8:142166069-142175285	DENND3	cryptic	1.45e-08	SCD
clu_69955_NA	10	chr7:966280-994032	ADAP1	cryptic	4.72e-07	SCD
clu_72627_NA	6	chr7:129357216-129367086	NRF1	cryptic	9.86e-07	SCD
clu_31441_NA	3	chr5:38960635-38962587	RICTOR	cryptic	7.11e-06	SCD
clu_24688_NA	6	chr9:77684018-77692075	NMRK1	cryptic	8.67e-06	SCD
clu_8643_NA	3	chr1:97700550-97771733	DPYD	cryptic	9.78e-06	SCD
clu_3888_NA	5	chr2:191874730-191878744	STAT1	annotated	1.22e-05	SCD
clu_30003_NA	3	chr3:150342686-150344797	SELENOT	cryptic	1.4e-05	SCD
clu_44644_NA	3	chr15:69745359-69747509	RPLP1	annotated	1.85e-05	SCD
clu_73336_NA	7	chr7:152498816-152511639	ACTR3B	cryptic	3.08e-05	SCD
clu_10861_NA	5	chr1:179877808-179886587	TOR1AIP1	annotated	3.14e-05	SCD
clu_71829_NA	5	chr7:98972404-98983325	ARPC1B	annotated	3.69e-05	SCD
clu_61112_NA	2	chr6:88218184-88218759	SLC35A1	cryptic	3.79e-05	SCD
clu_56686_NA	4	chr17:43297821-43298716	AC008105.3	cryptic	4.25e-05	SCD
clu_65687_NA	20	chr20:1438919-1460639	NSFL1C	cryptic	4.43e-05	SCD
clu_68724_NA	4	chr8:82627349-82630417	ZFAND1	cryptic	5.23e-05	SCD
clu_61723_NA	12	chr6:131486357-131540801	AKAP7	cryptic	5.96e-05	SCD
clu_53779_NA	18	chr4:154605512-154636108	TLR2	cryptic	6.26e-05	SCD
clu_19120_NA	12	chr22:41253249-41265023	XPNPEP3	cryptic	7.19e-05	SCD
clu_38232_NA	5	chr19:49964156-49965827	ALDH16A1	cryptic	7.57e-05	SCD
clu_27902_NA	3	chr3:46982555-47018127	CCDC12	cryptic	7.68e-05	SCD
clu_5286_NA	9	chr1:1198766-1209046	UBE2J2	annotated	8.32e-05	SCD
clu_11494_NA	4	chr1:207287630-207288761	C4BPA	cryptic	8.53e-05	SCD
clu_4685_NA	4	chr2:231109786-231112631	SP140	annotated	9.36e-05	SCD
clu_59915_NA	7	chr6:32486443-32523260	HLA-DRB6	cryptic	9.52e-05	SCD
clu_13326_NA	24	chr10:51246374-51497287	AGAP8	cryptic	9.8e-05	SCD
clu_58073_NA	9	chr17:73887428-73888348	TRIM65	cryptic	0.0001	SCD
clu_41615_NA	6	chr16:50332942-50338271	ADCY7	cryptic	0.000102	SCD
clu_44845_NA	7	chr15:75641680-75644665	NEIL1	cryptic	0.000106	SCD
clu_39679_NA	2	chr16:1498485-1498682	CLCN7	cryptic	0.000109	SCD
clu_42738_NA	3	chr16:87369063-87369771	FBXO31	cryptic	0.00011	SCD
clu_9320_NA	24	chr1:146374294-146395307	NBPF12	cryptic	0.000121	SCD
clu_8487_NA	6	chr1:89519151-89575360	GBP2	cryptic	0.000134	SCD
clu_14039_NA	10	chr10:94297307-94333679	IDE	cryptic	0.000136	SCD
clu_56722_NA	4	chr17:43509118-43510118	ARHGAP27	cryptic	0.000149	SCD
clu_23040_NA	11	chr11:104915299-104972135	CARD16	cryptic	0.000157	SCD
clu_39270_NA	7	chr19:58280272-58324662	ZNF552	cryptic	0.000168	SCD
clu_45165_NA	2	chr15:89011013-89011142	MRPS11	annotated	0.000178	SCD
clu_2784_NA	30	chr2:113993147-114020855	PAX8-AS1	cryptic	0.000185	SCD
clu_42627_NA	19	chr16:83823805-83839483	AC009119.1	cryptic	0.00019	SCD
clu_5520_NA	7	chr1:2489907-2491348	TNFRSF14	cryptic	0.000199	SCD
clu_25828_NA	10	chr9:130457420-130477823	PTRH1	cryptic	0.000206	SCD
clu_36632_NA	32	chr19:21326446-21373957	ZNF431	cryptic	0.000214	SCD
clu_23528_NA	4	chr11:120302620-120310838	ARHGEF12	cryptic	0.000221	SCD
clu_38777_NA	3	chr19:54687563-54692071	MBOAT7	annotated	0.000225	SCD
clu_59284_NA	9	chr6:26375026-26413397	BTN3A2	cryptic	0.000232	SCD
clu_36755_NA	2	chr19:33072233-33073101	PDCD5	annotated	0.000247	SCD
clu_1251_NA	3	chr2:54125491-54128487	PSME4	cryptic	0.000255	SCD
clu_35895_NA	5	chr19:14268266-14268694	ADGRL1	cryptic	0.000258	SCD
clu_64993_NA	2	chr13:49705506-49710468	FNDC3A	cryptic	0.000281	SCD
clu_12126_NA	8	chr1:234529583-234536927	TARBP1	cryptic	0.000284	SCD
clu_44897_NA	4	chr15:76958130-76994099	SCAPER	cryptic	0.000286	SCD
clu_22356_NA	6	chr11:68671506-68675613	IGHMBP2	cryptic	0.000298	SCD
clu_23377_NA	8	chr11:118210209-118213268	CD3D	cryptic	0.000299	SCD
clu_39538_NA	4	chr16:718699-720123	RHOT2	cryptic	0.00031	SCD
clu_7745_NA	8	chr1:46153947-46158876	TMEM69	cryptic	0.000323	SCD
clu_71818_NA	4	chr7:98630735-98633138	SMURF1	cryptic	0.000348	SCD
clu_61284_NA	3	chr6:101079089-101086477	ASCC3	cryptic	0.000357	SCD
clu_5832_NA	7	chr1:10057389-10068231	RBP7	cryptic	0.000369	SCD
clu_59105_NA	6	chr6:15533626-15615498	DTNBP1	cryptic	0.000369	SCD
clu_1896_NA	5	chr2:75187273-75332228	POLE4	cryptic	0.000371	SCD
clu_17972_NA	14	chr22:20812287-20850047	KLHL22	cryptic	0.000377	SCD
clu_15063_NA	4	chr10:134208696-134218130	PWWP2B	cryptic	0.000393	SCD
clu_56749_NA	4	chr17:44172067-44248221	KANSL1	cryptic	0.000394	SCD
clu_61765_NA	3	chr6:133092268-133093271	SLC18B1	cryptic	0.000397	SCD
clu_68394_NA	3	chr8:48803041-48809721	PRKDC	cryptic	0.000398	SCD
clu_38003_NA	2	chr19:47884249-47884463	DHX34	cryptic	0.000443	SCD
clu_49868_NA	3	chr12:120947926-120960017	COQ5	annotated	0.000445	SCD
clu_16342_NA	4	chr14:64921593-64926477	MTHFD1	annotated	0.000447	SCD
clu_28597_NA	4	chr3:52864686-52867130	AC006254.1	cryptic	0.000449	SCD
clu_44341_NA	11	chr15:60728426-60740169	ICE2	cryptic	0.000451	SCD
clu_37292_NA	3	chr19:39847729-39860295	SAMD4B	cryptic	0.000463	SCD
clu_68852_NA	2	chr8:95848859-95850722	INTS8	annotated	0.000463	SCD
clu_13737_NA	5	chr10:75555421-75556532	ZSWIM8	cryptic	0.000471	SCD
clu_11801_NA	7	chr1:224161748-224172084	GTF2IP20	cryptic	0.000474	SCD
clu_56346_NA	5	chr17:40129341-40135581	DNAJC7	cryptic	0.000476	SCD
clu_58193_NA	7	chr17:74684254-74714815	MXRA7	cryptic	0.00048	SCD
clu_49745_NA	3	chr12:116404048-116408399	MED13L	annotated	0.000481	SCD
clu_30188_NA	7	chr3:169840532-169846472	PHC3	cryptic	0.000498	SCD
clu_39822_NA	4	chr16:2130378-2131673	TSC2	cryptic	0.000501	SCD
clu_48616_NA	2	chr12:58217788-58218010	CTDSP2	annotated	0.000505	SCD
clu_17519_NA	2	chr14:105686464-105687985	BRF1	annotated	0.000505	SCD
clu_34627_NA	2	chr19:3551192-3557104	MFSD12	cryptic	0.000511	SCD
clu_3024_NA	3	chr2:128939864-128944257	UGGT1	cryptic	0.00053	SCD
clu_33170_NA	7	chr5:142780417-142814097	NR3C1	cryptic	0.000531	SCD
clu_52083_NA	10	chr4:15724557-15775730	BST1	cryptic	0.000551	SCD
clu_50712_NA	5	chr21:33735638-33740712	URB1	cryptic	0.000553	SCD
clu_25205_NA	6	chr9:100971422-100975390	TBC1D2	cryptic	0.000556	SCD
clu_41844_NA	11	chr16:57662714-57684165	ADGRG1	cryptic	0.000576	SCD
clu_8375_NA	3	chr1:79121196-79124997	IFI44	cryptic	0.000615	SCD
clu_13334_NA	6	chr10:51565296-51580556	NCOA4	cryptic	0.000617	SCD
clu_60278_NA	6	chr6:36716044-36724022	CPNE5	cryptic	0.000622	SCD
clu_11819_NA	6	chr1:224477435-224488264	NVL	cryptic	0.000631	SCD
clu_1776_NA	9	chr2:74087278-74100479	STAMBP	cryptic	0.000645	SCD
clu_41616_NA	3	chr16:50338417-50338836	ADCY7	cryptic	0.000653	SCD
clu_59121_NA	17	chr6:16307042-16486203	ATXN1	cryptic	0.00067	SCD
clu_47967_NA	4	chr12:51584375-51586113	POU6F1	cryptic	0.000684	SCD
clu_14182_NA	3	chr10:99118376-99118700	RRP12	cryptic	0.000689	SCD
clu_42739_NA	3	chr16:87369867-87376483	FBXO31	cryptic	0.0007	SCD
clu_32644_NA	2	chr5:121330365-121358065	SRFBP1	annotated	0.0007	SCD
clu_55740_NA	2	chr17:28612498-28613832	BLMH	cryptic	0.000704	SCD
clu_2728_NA	7	chr2:112996100-113007768	ZC3H8	cryptic	0.000708	SCD
clu_66925_NA	3	chr20:46290640-46292197	SULF2	cryptic	0.000709	SCD
clu_10360_NA	3	chr1:160519769-160520728	CD84	cryptic	0.000722	SCD
clu_65579_NA	9	chr13:114817630-114897910	RASA3	cryptic	0.00073	SCD
clu_13490_NA	3	chr10:70738732-70742299	DDX21	cryptic	0.000742	SCD
clu_71460_NA	8	chr7:76241130-76255317	POMZP3	cryptic	0.000745	SCD
clu_10400_NA	3	chr1:161013150-161015648	USF1	cryptic	0.000751	SCD
clu_40899_NA	2	chr16:24567238-24567655	RBBP6	cryptic	0.000752	SCD
clu_14072_NA	3	chr10:95169496-95191165	MYOF	cryptic	0.000761	SCD
clu_69750_NA	7	chr8:145597796-145603076	ADCK5	cryptic	0.000773	SCD
clu_11443_NA	3	chr1:206632293-206634382	SRGAP2	cryptic	0.000779	SCD
clu_59398_NA	2	chr6:29693340-29858041	HLA-F	cryptic	0.000785	SCD
clu_1360_NA	4	chr2:61014201-61018896	PAPOLG	cryptic	0.000787	SCD
clu_13296_NA	3	chr10:50030582-50034716	WDFY4	cryptic	0.000794	SCD
clu_16841_NA	10	chr14:78146313-78174165	ALKBH1	cryptic	0.000799	SCD
clu_52748_NA	7	chr4:77039347-77065543	NUP54	cryptic	0.000823	SCD
clu_38603_NA	5	chr19:53073583-53077330	ZNF701	cryptic	0.000835	SCD
clu_53291_NA	4	chr4:114375671-114378491	CAMK2D	annotated	0.000838	SCD
clu_21301_NA	9	chr11:61187566-61188862	CPSF7	annotated	0.000842	SCD
clu_49176_NA	3	chr12:100606306-100612193	ACTR6	cryptic	0.000844	SCD
clu_57002_NA	6	chr17:48216946-48218634	PPP1R9B	cryptic	0.000845	SCD
clu_35941_NA	3	chr19:14749152-14754920	ADGRE3	cryptic	0.000859	SCD
clu_30881_NA	8	chr3:197432046-197476140	RUBCN	cryptic	0.000864	SCD
clu_54997_NA	2	chr17:8050896-8051000	PER1	cryptic	0.000866	SCD
clu_57052_NA	4	chr17:48712342-48735796	ABCC3	cryptic	0.000869	SCD
clu_46326_NA	4	chr18:60612504-60625862	PHLPP1	cryptic	0.000869	SCD
clu_3059_NA	2	chr2:131813268-131829428	FAM168B	cryptic	0.00087	SCD
clu_50908_NA	3	chr21:38463713-38467650	TTC3	annotated	0.000872	SCD
clu_54804_NA	5	chr17:7094677-7096802	DLG4	cryptic	0.000887	SCD
clu_48378_NA	2	chr12:56749309-56749492	STAT2	cryptic	0.000891	SCD
clu_51000_NA	4	chr21:42813841-42815715	MX1	cryptic	0.000899	SCD
clu_28370_NA	6	chr3:51452214-51454241	DCAF1	cryptic	0.000904	SCD
clu_48650_NA	7	chr12:62960230-62974077	MON2	cryptic	0.000926	SCD
clu_61093_NA	10	chr6:86375865-86387854	SNHG5	annotated	0.000926	SCD
clu_46236_NA	4	chr18:55230212-55238624	FECH	cryptic	0.000938	SCD
clu_33695_NA	4	chr5:176700785-176707566	NSD1	cryptic	0.00099	SCD
clu_71337_NA	4	chr7:74573776-74576502	NCF1C	cryptic	1e-09	MCI
clu_18357_NA	7	chr22:26906247-26908065	TFIP11	annotated	1.04e-09	MCI
clu_51806_NA	3	chr4:4436585-4440121	STX18	cryptic	8.89e-08	MCI
clu_35950_NA	10	chr19:14876616-14883154	ADGRE2	cryptic	9.44e-08	MCI
clu_65834_NA	18	chr20:3789249-3802749	AP5S1	cryptic	1.51e-07	MCI
clu_41750_NA	3	chr16:57079404-57081457	NLRC5	annotated	3.33e-07	MCI
clu_34111_NA	4	chr19:1032695-1036415	CNN2	annotated	1.76e-06	MCI
clu_59233_NA	12	chr6:25973513-25983396	TRIM38	cryptic	6.19e-06	MCI
clu_38244_NA	10	chr19:50031971-50040290	RCN3	cryptic	8.33e-06	MCI
clu_51249_NA	4	chr21:46898267-46899816	COL18A1	cryptic	9.29e-06	MCI
clu_58311_NA	3	chr17:77078145-77079102	ENGASE	cryptic	9.34e-06	MCI
clu_51693_NA	4	chr4:2692697-2695313	FAM193A	cryptic	1.02e-05	MCI
clu_32364_NA	4	chr5:96244821-96248341	ERAP2	cryptic	1.99e-05	MCI
clu_11596_NA	8	chr1:211570173-211605661	LINC00467	annotated	2.41e-05	MCI
clu_4145_NA	3	chr2:203757425-203760788	WDR12	cryptic	3.15e-05	MCI
clu_46651_NA	3	chr12:4446326-4460433	TIGAR	cryptic	4.56e-05	MCI
clu_51341_NA	2	chr21:47627474-47628165	LSS	cryptic	6.09e-05	MCI
clu_37243_NA	3	chr19:39421628-39421916	MRPS12	cryptic	6.12e-05	MCI
clu_26542_NA	2	chr9:139733573-139733766	RABL6	annotated	6.73e-05	MCI
clu_24694_NA	11	chr9:80868193-80880288	CEP78	cryptic	7.12e-05	MCI
clu_38690_NA	23	chr19:53700515-53724282	AC092070.2	cryptic	7.61e-05	MCI
clu_30135_NA	10	chr3:169491250-169497122	MYNN	cryptic	9e-05	MCI
clu_46176_NA	2	chr18:54318807-54339728	WDR7	annotated	9.55e-05	MCI
clu_39353_NA	12	chr16:62378-63246	DDX11L10	cryptic	9.79e-05	MCI
clu_38277_NA	5	chr19:50189983-50191419	PRMT1	cryptic	0.000101	MCI
clu_20667_NA	3	chr11:20385978-20398126	HTATIP2	cryptic	0.000113	MCI
clu_6153_NA	6	chr1:16270179-16270795	ZBTB17	cryptic	0.000116	MCI
clu_35111_NA	2	chr19:7976215-7976321	MAP2K7	annotated	0.000124	MCI
clu_8466_NA	3	chr1:87346408-87368964	SELENOF	annotated	0.000136	MCI
clu_5346_NA	2	chr1:1274033-1274742	DVL1	annotated	0.000151	MCI
clu_1426_NA	3	chr2:61571164-61575005	USP34	annotated	0.000158	MCI
clu_42220_NA	6	chr16:68964198-69007931	TANGO6	cryptic	0.000159	MCI
clu_30895_NA	20	chr3:197880280-197907626	FAM157A	cryptic	0.000163	MCI
clu_45199_NA	10	chr15:90380954-90431753	AP3S2	cryptic	0.000188	MCI
clu_42182_NA	3	chr16:68289893-68293049	PLA2G15	cryptic	0.000194	MCI
clu_47344_NA	3	chr12:28458712-28459743	CCDC91	cryptic	0.000207	MCI
clu_37455_NA	18	chr19:42092224-42110519	CEACAM21	cryptic	0.000214	MCI
clu_27493_NA	5	chr3:37396678-37420533	GOLGA4	cryptic	0.000221	MCI
clu_22747_NA	4	chr11:77815499-77820488	ALG8	cryptic	0.00023	MCI
clu_50139_NA	2	chr12:124827768-124829143	NCOR2	cryptic	0.000235	MCI
clu_67611_NA	13	chr8:8973916-9008073	PPP1R3B	cryptic	0.000254	MCI
clu_46312_NA	3	chr18:66351722-66354904	TMX3	cryptic	0.000294	MCI
clu_10885_NA	3	chr1:180017840-180022105	CEP350	annotated	0.000297	MCI
clu_15295_NA	5	chr14:21884066-21894287	CHD8	cryptic	0.000313	MCI
clu_2285_NA	9	chr2:96880924-96931607	TMEM127	cryptic	0.000328	MCI
clu_41215_NA	5	chr16:30007938-30012079	INO80E	cryptic	0.000334	MCI
clu_71708_NA	2	chr7:95053897-95064571	PON2	cryptic	0.00034	MCI
clu_25763_NA	7	chr9:130187082-130191111	ZNF79	cryptic	0.000349	MCI
clu_31365_NA	3	chr5:37162668-37165641	CPLANE1	cryptic	0.000357	MCI
clu_40930_NA	7	chr16:27709821-27715217	KIAA0556	cryptic	0.000368	MCI
clu_8432_NA	2	chr1:85418213-85422114	MCOLN2	cryptic	0.000387	MCI
clu_30077_NA	5	chr3:158364736-158369885	GFM1	cryptic	0.000393	MCI
clu_55301_NA	10	chr17:18257131-18266686	SHMT1	cryptic	0.000402	MCI
clu_56199_NA	4	chr17:38189709-38191370	MED24	annotated	0.000416	MCI
clu_40987_NA	4	chr16:28603764-28618082	SULT1A1	cryptic	0.000439	MCI
clu_25331_NA	2	chr9:114152377-114154036	ECPAS	cryptic	0.000446	MCI
clu_30212_NA	4	chr3:172062024-172065002	FNDC3B	cryptic	0.000477	MCI
clu_37522_NA	2	chr19:42753810-42753979	ERF	annotated	0.00048	MCI
clu_16533_NA	21	chr14:73002983-73048076	RGS6	cryptic	0.0005	MCI
clu_8973_NA	17	chr1:112147324-112163296	LINC01160	cryptic	0.000503	MCI
clu_34067_NA	3	chr19:886201-890137	MED16	annotated	0.000536	MCI
clu_32939_NA	3	chr5:137897478-137902690	HSPA9	cryptic	0.00054	MCI
clu_66254_NA	2	chr20:31016032-31016128	ASXL1	cryptic	0.000546	MCI
clu_11984_NA	3	chr1:228511307-228520561	OBSCN	cryptic	0.000547	MCI
clu_11069_NA	4	chr1:186925313-186946725	PLA2G4A	cryptic	0.000549	MCI
clu_9977_NA	3	chr1:155237917-155238084	CLK2	cryptic	0.000554	MCI
clu_69381_NA	6	chr8:135669980-135725088	ZFAT	cryptic	0.000555	MCI
clu_71852_NA	15	chr7:99673253-99679924	ZNF3	cryptic	0.000565	MCI
clu_26858_NA	2	chr3:4458926-4459694	SUMF1	cryptic	0.000569	MCI
clu_52304_NA	13	chr4:40778276-40800843	NSUN7	cryptic	0.000583	MCI
clu_28196_NA	2	chr3:49847965-49848185	UBA7	cryptic	0.000607	MCI
clu_17242_NA	9	chr14:100828258-100842597	WARS1	cryptic	0.000631	MCI
clu_31749_NA	2	chr5:65460725-65465885	SREK1	cryptic	0.000637	MCI
clu_1103_NA	6	chr2:43444403-43453404	ZFP36L2	cryptic	0.000638	MCI
clu_50524_NA	2	chr21:18977315-18981290	BTG3	cryptic	0.000651	MCI
clu_70989_NA	2	chr7:56032394-56045819	NIPSNAP2	annotated	0.000658	MCI
clu_52849_NA	5	chr4:85731497-85741238	WDFY3	cryptic	0.000665	MCI
clu_15686_NA	2	chr14:31139601-31142463	SCFD1	cryptic	0.000702	MCI
clu_16258_NA	2	chr14:62162557-62187100	HIF1A	annotated	0.000706	MCI
clu_62114_NA	2	chr6:152826532-152831328	SYNE1	cryptic	0.000713	MCI
clu_54181_NA	3	chr17:1561897-1562651	PRPF8	cryptic	0.00072	MCI
clu_62277_NA	3	chr6:160448346-160453583	IGF2R	cryptic	0.00072	MCI
clu_48475_NA	3	chr12:57906747-57908503	MARS1	cryptic	0.00073	MCI
clu_32363_NA	4	chr5:96232567-96237210	ERAP2	cryptic	0.000731	MCI
clu_3909_NA	5	chr2:191874730-191878744	STAT1	annotated	0.000739	MCI
clu_58370_NA	7	chr17:78311797-78317030	RNF213	cryptic	0.000744	MCI
clu_71940_NA	3	chr7:100033156-100033471	PPP1R35	annotated	0.000748	MCI
clu_50630_NA	4	chr21:33692950-33694788	URB1	cryptic	0.000766	MCI
clu_65065_NA	7	chr13:52728127-52733678	NEK3	cryptic	0.000773	MCI
clu_21950_NA	6	chr11:65480526-65481064	KAT5	cryptic	0.000785	MCI
clu_49173_NA	6	chr12:104359838-104373609	TDG	annotated	0.000787	MCI
clu_41165_NA	2	chr16:29811102-29811282	KIF22	cryptic	0.000799	MCI
clu_18547_NA	3	chr22:31302056-31302189	OSBP2	cryptic	0.000825	MCI
clu_42736_NA	10	chr16:87760530-87795555	KLHDC4	cryptic	0.000835	MCI
clu_58565_NA	4	chr17:79982639-79983316	LRRC45	cryptic	0.000837	MCI
clu_4415_NA	2	chr2:219339608-219341563	USP37	annotated	0.000867	MCI
clu_54882_NA	8	chr17:7760516-7786553	NAA38	cryptic	0.000872	MCI
clu_52157_NA	3	chr4:36085072-36093503	ARAP2	cryptic	0.000879	MCI
clu_51468_NA	3	chr4:674376-675682	MYL5	cryptic	0.000894	MCI
clu_39961_NA	3	chr16:3074269-3075713	THOC6	cryptic	0.000898	MCI
clu_72185_NA	4	chr7:102246427-102249208	RASA4	cryptic	0.000908	MCI
clu_25968_NA	4	chr9:131585112-131586351	SPOUT1	cryptic	0.000911	MCI
clu_54123_NA	3	chr17:1268352-1303341	YWHAE	annotated	0.000915	MCI
clu_13705_NA	13	chr10:75264030-75279366	PPP3CB-AS1	cryptic	0.000919	MCI
clu_32595_NA	5	chr5:118604602-118728511	TNFAIP8	annotated	0.000923	MCI
clu_68558_NA	8	chr8:67344810-67356602	ADHFE1	annotated	0.000937	MCI
clu_5298_NA	8	chr1:1198766-1209046	UBE2J2	annotated	0.00094	MCI
clu_59581_NA	5	chr6:30879476-30879843	GTF2H4	cryptic	0.000941	MCI
clu_48981_NA	5	chr12:95445565-95451329	NR2C1	cryptic	0.000982	MCI
clu_50456_NA	4	chr12:133448980-133454141	CHFR	cryptic	0.000993	MCI
clu_50437_NA	3	chr12:133375063-133378373	GOLGA3	cryptic	0.000999	MCI
clu_10659_NA	5	chr1:179877808-179886587	TOR1AIP1	annotated	1.3e-15	AD
clu_36740_NA	4	chr19:42314392-42315210	CEACAM3	cryptic	1.06e-13	AD
clu_56056_NA	5	chr17:56383004-56383703	TSPOAP1	cryptic	2.94e-10	AD
clu_2100_NA	9	chr2:89157196-89442543	IGKV3-20	cryptic	1.22e-09	AD
clu_4687_NA	3	chr2:234107022-234115352	INPP5D	annotated	2.09e-09	AD
clu_38161_NA	6	chr19:55087576-55098677	LILRA2	cryptic	1.12e-07	AD
clu_26905_NA	11	chr3:33016178-33055548	GLB1	cryptic	1.25e-07	AD
clu_40239_NA	4	chr16:28846720-28846934	ATXN2L	cryptic	1.36e-07	AD
clu_29830_NA	3	chr3:183894855-183897957	AP2M1	cryptic	1.46e-07	AD
clu_14394_NA	3	chr10:114186117-114186976	ACSL5	annotated	3.28e-07	AD
clu_44821_NA	17	chr18:11897355-11908200	MPPE1	cryptic	3.85e-07	AD
clu_19415_NA	13	chr11:290600-292016	PGGHG	cryptic	7.63e-07	AD
clu_52736_NA	3	chr4:160264556-160266258	RAPGEF2	annotated	9.97e-07	AD
clu_48129_NA	7	chr12:98931350-98940137	TMPO	annotated	2.15e-06	AD
clu_50262_NA	5	chr21:46678592-46687505	POFUT2	cryptic	3.82e-06	AD
clu_56413_NA	11	chr17:62793527-62817885	PLEKHM1P1	cryptic	4.51e-06	AD
clu_68655_NA	6	chr7:2979460-2983846	CARD11	cryptic	9.53e-06	AD
clu_53652_NA	9	chr17:6919844-6920580	C17orf49	cryptic	1.08e-05	AD
clu_5086_NA	8	chr1:667516-672093	AL669831.1	cryptic	1.29e-05	AD
clu_33085_NA	8	chr5:176918143-176919406	PDLIM7	cryptic	1.43e-05	AD
clu_69117_NA	8	chr7:33066527-33102180	NT5C3A	cryptic	1.48e-05	AD
clu_10094_NA	12	chr1:159778234-159779884	FCRL6	cryptic	2.1e-05	AD
clu_2102_NA	3	chr2:89292223-89309900	IGKV1-8	cryptic	2.13e-05	AD
clu_18554_NA	7	chr22:39148659-39151768	SUN2	cryptic	2.39e-05	AD
clu_41937_NA	10	chr16:87760530-87795555	KLHDC4	cryptic	2.4e-05	AD
clu_46102_NA	5	chr12:9602329-9750642	KLRB1	cryptic	2.5e-05	AD
clu_39149_NA	3	chr16:2818262-2818998	SRRM2	annotated	2.87e-05	AD
clu_34714_NA	4	chr19:10445458-10446347	ICAM3	cryptic	3.08e-05	AD
clu_8636_NA	3	chr1:109772194-109777832	SARS1	annotated	3.09e-05	AD
clu_28070_NA	15	chr3:53195444-53212431	PRKCD	cryptic	3.43e-05	AD
clu_50289_NA	26	chr21:46918526-46945731	SLC19A1	cryptic	3.52e-05	AD
clu_20811_NA	5	chr11:60882555-60885647	CD5	cryptic	3.72e-05	AD
clu_57510_NA	8	chr17:80377677-80386434	HEXD	cryptic	3.85e-05	AD
clu_15232_NA	9	chr14:24584133-24584752	DCAF11	cryptic	5.11e-05	AD
clu_67260_NA	3	chr8:82627349-82630417	ZFAND1	annotated	5.26e-05	AD
clu_37398_NA	2	chr19:49481259-49481357	GYS1	cryptic	5.57e-05	AD
clu_71487_NA	2	chr7:148769471-148771478	ZNF786	cryptic	5.64e-05	AD
clu_25096_NA	7	chr9:123877478-123886209	CNTRL	cryptic	5.84e-05	AD
clu_8738_NA	8	chr1:111680208-111682665	DRAM2	cryptic	6.03e-05	AD
clu_37480_NA	3	chr19:50016007-50017139	FCGRT	annotated	6.82e-05	AD
clu_44362_NA	6	chr15:90631979-90645508	IDH2	cryptic	7.17e-05	AD
clu_7092_NA	4	chr1:36938287-36939365	CSF3R	cryptic	7.27e-05	AD
clu_26561_NA	9	chr3:11643496-11744445	VGLL4	cryptic	7.63e-05	AD
clu_17810_NA	2	chr22:24109727-24110021	CHCHD10	annotated	7.66e-05	AD
clu_47447_NA	7	chr12:57058584-57065533	PTGES3	cryptic	7.99e-05	AD
clu_19075_NA	4	chr22:50191644-50192221	BRD1	cryptic	8.09e-05	AD
clu_21750_NA	15	chr11:67183234-67186958	CARNS1	cryptic	8.67e-05	AD
clu_64295_NA	20	chr20:1532684-1600515	SIRPB1	cryptic	0.000103	AD
clu_8243_NA	12	chr1:85418213-85462691	MCOLN2	cryptic	0.000104	AD
clu_34485_NA	5	chr19:8398692-8402679	KANK3	cryptic	0.000107	AD
clu_58717_NA	7	chr6:32610030-32714192	HLA-DQA1	cryptic	0.000108	AD
clu_21423_NA	3	chr11:65307352-65307716	LTBP3	annotated	0.000113	AD
clu_18048_NA	3	chr22:29724884-29726367	AP1B1	annotated	0.000113	AD
clu_28753_NA	4	chr3:121774350-121822359	CD86	annotated	0.000123	AD
clu_63782_NA	3	chr13:76378677-76391297	LMO7	annotated	0.000126	AD
clu_30318_NA	20	chr3:197880280-197907626	FAM157A	cryptic	0.000131	AD
clu_23220_NA	3	chr11:128333522-128354718	ETS1	annotated	0.000133	AD
clu_54097_NA	6	chr17:16342728-16343499	SNHG29	annotated	0.000133	AD
clu_39396_NA	3	chr16:4411470-4411986	CORO7	annotated	0.000136	AD
clu_37126_NA	3	chr19:46405083-46406008	MYPOP	cryptic	0.000137	AD
clu_11484_NA	4	chr1:220384218-220386229	RAB3GAP2	cryptic	0.000139	AD
clu_65954_NA	5	chr20:62325841-62326419	RTEL1	cryptic	0.000148	AD
clu_33503_NA	2	chr19:1049004-1049317	ABCA7	cryptic	0.000152	AD
clu_52767_NA	3	chr4:169158946-169167569	DDX60	cryptic	0.000154	AD
clu_11827_NA	5	chr1:229763506-229779280	URB2	cryptic	0.000155	AD
clu_12332_NA	20	chr10:6002431-6019740	IL15RA	cryptic	0.000157	AD
clu_47636_NA	2	chr12:58217510-58217687	CTDSP2	cryptic	0.00016	AD
clu_57524_NA	12	chr17:80404568-80408576	CYBC1	cryptic	0.000167	AD
clu_68759_NA	2	chr7:6210277-6210461	CYTH3	cryptic	0.000175	AD
clu_60083_NA	16	chr6:108029215-108066153	SCML4	cryptic	0.000176	AD
clu_34423_NA	6	chr19:7743869-7747128	TRAPPC5	cryptic	0.000177	AD
clu_13631_NA	10	chr10:89086429-89096543	NUTM2A-AS1	cryptic	0.000184	AD
clu_2421_NA	3	chr2:99944116-99949485	TXNDC9	cryptic	0.000193	AD
clu_66559_NA	9	chr8:26151256-26211984	PPP2R2A	cryptic	0.000195	AD
clu_36615_NA	3	chr19:40698361-40704282	MAP3K10	cryptic	0.000198	AD
clu_4296_NA	2	chr2:219267128-219267758	CTDSP1	annotated	0.000209	AD
clu_39042_NA	3	chr16:2140139-2140295	PKD1	cryptic	0.000214	AD
clu_68789_NA	9	chr7:6677078-6681503	ZNF316	cryptic	0.000214	AD
clu_26352_NA	4	chr3:3189871-3194098	TRNT1	cryptic	0.000215	AD
clu_26706_NA	11	chr3:15452944-15457279	METTL6	cryptic	0.000223	AD
clu_20156_NA	2	chr11:17096710-17097001	RPS13	annotated	0.000227	AD
clu_38549_NA	4	chr19:58899612-58905864	RPS5	cryptic	0.000228	AD
clu_32366_NA	4	chr5:138858093-138860375	STING1	cryptic	0.000231	AD
clu_44267_NA	2	chr15:86228104-86236508	AKAP13	annotated	0.000237	AD
clu_53437_NA	4	chr17:4621318-4621907	ARRB2	cryptic	0.000239	AD
clu_45230_NA	3	chr18:46906128-46917963	DYM	annotated	0.000239	AD
clu_20005_NA	2	chr11:10051422-10052632	SBF2	cryptic	0.000243	AD
clu_59868_NA	8	chr6:88346204-88362834	ORC3	cryptic	0.000253	AD
clu_5117_NA	2	chr1:897851-898084	KLHL17	cryptic	0.000259	AD
clu_41167_NA	3	chr16:67062930-67063630	CBFB	annotated	0.000265	AD
clu_18355_NA	2	chr22:36907047-36907550	EIF3D	annotated	0.000276	AD
clu_9703_NA	7	chr1:155108852-155110455	SLC50A1	annotated	0.000279	AD
clu_42707_NA	15	chr15:40398292-40400974	BMF	cryptic	0.000281	AD
clu_46834_NA	3	chr12:49491522-49494171	LMBR1L	annotated	0.000282	AD
clu_26036_NA	3	chr9:139686810-139693554	TMEM141	cryptic	0.000284	AD
clu_29839_NA	3	chr3:183907231-183907409	ABCF3	cryptic	0.000285	AD
clu_64221_NA	6	chr13:115028489-115037753	CDC16	cryptic	0.000292	AD
clu_18650_NA	8	chr22:40365537-40380179	GRAP2	cryptic	0.000301	AD
clu_24359_NA	3	chr9:90254398-90254704	DAPK1	annotated	0.000311	AD
clu_56571_NA	3	chr17:68164998-68170965	KCNJ2	cryptic	0.000314	AD
clu_35534_NA	10	chr19:17517105-17534307	BISPR	cryptic	0.00032	AD
clu_27160_NA	2	chr3:42642116-42642476	NKTR	cryptic	0.000328	AD
clu_32443_NA	4	chr5:140077663-140080404	HARS2	cryptic	0.000344	AD
clu_5191_NA	2	chr1:1235582-1235889	ACAP3	cryptic	0.00035	AD
clu_38765_NA	3	chr16:733909-734234	JMJD8	annotated	0.00035	AD
clu_67236_NA	24	chr8:80831383-80954855	MRPS28	cryptic	0.000353	AD
clu_8081_NA	7	chr1:68564436-68603463	WLS	cryptic	0.00036	AD
clu_59043_NA	6	chr6:36716044-36724022	CPNE5	cryptic	0.000361	AD
clu_28405_NA	3	chr3:98489800-98491657	ST3GAL6	annotated	0.000364	AD
clu_17564_NA	7	chr22:20394648-20427640	PI4KAP1	cryptic	0.000366	AD
clu_7627_NA	5	chr1:46871466-46874131	FAAH	cryptic	0.000368	AD
clu_25743_NA	2	chr9:135786955-135787669	TSC1	cryptic	0.000369	AD
clu_54700_NA	6	chr17:30267505-30293166	SUZ12	cryptic	0.000379	AD
clu_42702_NA	11	chr15:40314806-40326527	EIF2AK4	cryptic	0.000388	AD
clu_34179_NA	4	chr19:5600271-5610006	SAFB2	cryptic	0.000415	AD
clu_14514_NA	5	chr10:121591608-121596408	MCMBP	cryptic	0.000476	AD
clu_2026_NA	3	chr2:87015683-87016763	CD8A	annotated	0.000478	AD
clu_11653_NA	5	chr1:226110080-226111401	PYCR2	cryptic	0.000479	AD
clu_44788_NA	7	chr18:9475689-9516843	RALBP1	cryptic	0.00048	AD
clu_67023_NA	2	chr8:59508218-59509946	NSMAF	annotated	0.000485	AD
clu_14561_NA	7	chr10:124184475-124189140	PLEKHA1	cryptic	0.000494	AD
clu_39448_NA	3	chr16:4851586-4852528	ROGDI	annotated	0.000508	AD
clu_66168_NA	6	chr8:8197151-8233763	PRAG1	cryptic	0.000521	AD
clu_42990_NA	4	chr15:43017844-43018508	CDAN1	cryptic	0.000528	AD
clu_40504_NA	3	chr16:30370138-30370859	TBC1D10B	annotated	0.000531	AD
clu_8661_NA	3	chr1:110030426-110031469	ATXN7L2	cryptic	0.000556	AD
clu_26861_NA	29	chr3:28282349-28357824	CMC1	cryptic	0.00057	AD
clu_4018_NA	2	chr2:203155180-203155848	NOP58	annotated	0.000581	AD
clu_44142_NA	3	chr15:81598886-81605630	IL16	cryptic	0.000588	AD
clu_63955_NA	7	chr13:100925600-100982815	PCCA	cryptic	0.000591	AD
clu_35268_NA	10	chr19:14876616-14883154	ADGRE2	cryptic	0.000612	AD
clu_68448_NA	3	chr7:635941-645830	PRKAR1B	cryptic	0.000621	AD
clu_49520_NA	18	chr21:9909277-9966322	TEKT4P2	cryptic	0.000624	AD
clu_18911_NA	5	chr22:43547610-43557058	TSPO	cryptic	0.000627	AD
clu_44415_NA	6	chr15:91433714-91434784	FES	cryptic	0.000629	AD
clu_38162_NA	3	chr19:55105941-55142951	LILRB1	cryptic	0.000634	AD
clu_41195_NA	4	chr16:67226265-67226668	E2F4	cryptic	0.000642	AD
clu_45980_NA	2	chr12:7649729-7651464	CD163	cryptic	0.000646	AD
clu_8541_NA	6	chr1:101440458-101490976	SLC30A7	cryptic	0.000647	AD
clu_21923_NA	5	chr11:70194526-70200407	PPFIA1	annotated	0.000648	AD
clu_59350_NA	3	chr6:43171725-43172098	CUL9	cryptic	0.000657	AD
clu_23845_NA	4	chr9:35610280-35611801	CD72	cryptic	0.000658	AD
clu_16340_NA	4	chr14:75231065-75245150	YLPM1	cryptic	0.000665	AD
clu_32914_NA	3	chr5:171472026-171479933	STK10	annotated	0.00067	AD
clu_21111_NA	4	chr11:63670630-63672258	MARK2	cryptic	0.000677	AD
clu_56886_NA	4	chr17:73839600-73840302	UNC13D	cryptic	0.000689	AD
clu_5658_NA	16	chr1:9690282-9770482	PIK3CD	cryptic	0.000695	AD
clu_32091_NA	3	chr5:130775408-130782176	RAPGEF6	cryptic	0.000708	AD
clu_24348_NA	3	chr9:88924932-88932134	TUT7	cryptic	0.000714	AD
clu_10065_NA	3	chr1:158813912-158817518	MNDA	cryptic	0.00072	AD
clu_21966_NA	16	chr11:71500891-71510668	FAM86C1	cryptic	0.000738	AD
clu_44000_NA	2	chr15:75909889-75913235	SNUPN	cryptic	0.000741	AD
clu_36207_NA	5	chr19:36209283-36210752	KMT2B	cryptic	0.000743	AD
clu_32990_NA	3	chr5:175825048-175837258	CLTB	annotated	0.000749	AD
clu_71617_NA	6	chr7:150384175-150416130	GIMAP2	cryptic	0.000755	AD
clu_46890_NA	2	chr12:50042136-50042812	FMNL3	cryptic	0.000762	AD
clu_52545_NA	8	chr4:148560233-148581997	PRMT9	cryptic	0.000781	AD
clu_5356_NA	4	chr1:2317336-2319678	MORN1	cryptic	0.000789	AD
clu_49479_NA	3	chr12:133375063-133378373	GOLGA3	cryptic	0.000795	AD
clu_3526_NA	19	chr2:173460751-173492557	PDK1	cryptic	0.000831	AD
clu_69483_NA	9	chr7:50694675-50742133	GRB10	cryptic	0.000841	AD
clu_14966_NA	6	chr14:21788336-21790013	RPGRIP1	cryptic	0.000845	AD
clu_37297_NA	4	chr19:48707500-48718597	CARD8	annotated	0.000845	AD
clu_46120_NA	5	chr12:9808575-9809517	AC010186.2	cryptic	0.000854	AD
clu_49181_NA	2	chr12:124820178-124821299	NCOR2	cryptic	0.000856	AD
clu_3110_NA	3	chr2:144314054-144381705	ARHGAP15	cryptic	0.000865	AD
clu_18813_NA	37	chr22:42521412-42548186	NDUFA6-DT	cryptic	0.000868	AD
clu_32772_NA	7	chr5:154320825-154346246	MRPL22	cryptic	0.000868	AD
clu_28669_NA	7	chr3:118935191-118942905	B4GALT4	cryptic	0.000874	AD
clu_28932_NA	4	chr3:128060732-128126912	EEFSEC	cryptic	0.000875	AD
clu_41913_NA	3	chr16:87369063-87369771	FBXO31	cryptic	0.000895	AD
clu_17112_NA	18	chr14:105510235-105531938	GPR132	cryptic	0.000915	AD
clu_60050_NA	3	chr6:106553808-106554786	PRDM1	cryptic	0.000916	AD
clu_51594_NA	6	chr4:73927598-73930967	COX18	cryptic	0.000924	AD
clu_14066_NA	4	chr10:102267805-102268764	SEC31B	cryptic	0.000934	AD
clu_41571_NA	3	chr16:70582345-70588349	SF3B3	annotated	0.000938	AD
clu_55413_NA	2	chr17:42169108-42169540	HDAC5	cryptic	0.00096	AD
clu_71070_NA	3	chr7:129297414-129317472	NRF1	cryptic	0.000974	AD
clu_20534_NA	6	chr11:47333393-47345222	MADD	cryptic	0.00099	AD
clu_51153_NA	6	chr4:36150129-36160953	ARAP2	cryptic	0.00099	AD
clu_21481_NA	5	chr11:65403274-65403645	PCNX3	cryptic	0.000991	AD

## Sheet: Table S5
Table S5. Differentially expressed lncRNAs in SCD MCI and AD
baseMean	log2FoldChange	lfcSE	stat	pvalue	padj	group	level	ensg	gene_symbol	tx_symbol	biotype
420	-0.44	0.2	-2.2	0.029	0.14	AD	gene	ENSG00000174171.6_7	AC020659.1	AC020659.1	lncRNA
180	0.45	0.15	3	0.003	0.068	AD	gene	ENSG00000203644.3_7	AC083799.1	AC083799.1	lncRNA
670	0.5	0.23	2.2	0.03	0.15	AD	gene	ENSG00000226777.7_5	FAM30A	FAM30A	lncRNA
100	0.46	0.18	2.6	0.0099	0.095	AD	gene	ENSG00000237803.6_6	LINC00211	LINC00211	lncRNA
250	0.49	0.19	2.6	0.011	0.097	AD	gene	ENSG00000248810.2_7	LINC02432	LINC02432	lncRNA
73	0.57	0.28	2	0.042	NA	AD	gene	ENSG00000253701.1	AL928768.3	AL928768.3	lncRNA
100	-0.46	0.21	-2.2	0.026	0.14	AD	gene	ENSG00000255441.1_6	AC008750.2	AC008750.2	lncRNA
71	0.38	0.13	3	0.0031	NA	AD	gene	ENSG00000255760.2_7	LINC02422	LINC02422	lncRNA
18	-0.39	0.16	-2.5	0.014	NA	AD	gene	ENSG00000260496.3_7	AC009041.1	AC009041.1	lncRNA
7.7	0.46	0.19	2.4	0.017	NA	AD	gene	ENSG00000269246.1_7	AC011445.2	AC011445.2	lncRNA
130	0.38	0.13	2.9	0.0038	0.071	AD	gene	ENSG00000269996.1	RP11-343N15.5	RP11-343N15.5	lncRNA
9.9	0.47	0.17	2.7	0.007	NA	AD	gene	ENSG00000270062.1_7	AL606834.2	AL606834.2	lncRNA
69	0.38	0.17	2.3	0.023	NA	AD	gene	ENSG00000270120.1_7	AC007728.3	AC007728.3	lncRNA
48	0.53	0.19	2.7	0.006	NA	AD	gene	ENSG00000270164.1_5	LINC01480	LINC01480	lncRNA
13	0.44	0.19	2.4	0.019	NA	AD	gene	ENSG00000273133.1_6	AC116651.1	AC116651.1	lncRNA
85	0.39	0.093	4.2	2.1e-05	0.017	AD	gene	ENSG00000273247.5_9	AC097376.3	AC097376.3	lncRNA
75	-0.5	0.15	-3.4	0.00061	NA	AD	gene	ENSG00000279141.3_5	AL590226.2	AL590226.2	lncRNA
150	0.67	0.32	2.1	0.036	0.16	AD	gene	ENSG00000285565.1_2	AL671762.1	AL671762.1	lncRNA
200	-0.48	0.22	-2.2	0.03	NA	AD	iso	ENST00000309874.2_2	AC020659.1	AC020659.1-201	lncRNA
51	-0.52	0.24	-2.2	0.03	NA	AD	iso	ENST00000568861.1_1	AC020659.1	AC020659.1-203	lncRNA
22	-0.94	0.44	-2.1	0.032	NA	AD	iso	ENST00000666268.1_2	SNHG17	SNHG17-268	lncRNA
180	0.46	0.15	3	0.0025	NA	AD	iso	ENST00000366451.3_1	AC083799.1	AC083799.1-201	lncRNA
20	-0.74	0.24	-3	0.0024	NA	AD	iso	ENST00000433920.5_2	NUTM2A-AS1	NUTM2A-AS1-207	lncRNA
36	-0.7	0.2	-3.5	0.00044	NA	AD	iso	ENST00000655272.1_2	NUTM2A-AS1	NUTM2A-AS1-216	lncRNA
22	0.69	0.25	2.8	0.0047	NA	AD	iso	ENST00000628233.2_1	FAM30A	FAM30A-203	lncRNA
630	0.55	0.24	2.3	0.021	0.17	AD	iso	ENST00000630242.2_1	FAM30A	FAM30A-205	lncRNA
5.3	0.84	0.41	2.1	0.04	NA	AD	iso	ENST00000631009.1_1	FAM30A	FAM30A-206	lncRNA
47	-0.41	0.18	-2.3	0.022	NA	AD	iso	ENST00000596026.1	AC159540.1	AC159540.1-013	lncRNA
78	-0.44	0.14	-3.2	0.0015	NA	AD	iso	ENST00000454269.6_3	HCG18	HCG18-240	lncRNA
76	0.54	0.17	3.1	0.002	NA	AD	iso	ENST00000646587.1_2	LINC-PINT	LINC-PINT-220	lncRNA
16	0.63	0.31	2.1	0.039	NA	AD	iso	ENST00000422207.5_2	GAS5	GAS5-207	lncRNA
19	-0.49	0.18	-2.8	0.0058	NA	AD	iso	ENST00000668369.1_2	LINC00299	LINC00299-218	lncRNA
67	0.6	0.24	2.5	0.012	NA	AD	iso	ENST00000655948.1_2	LINC00211	LINC00211-205	lncRNA
44	-0.52	0.21	-2.5	0.014	NA	AD	iso	ENST00000604669.5_1	AC138035.1	AC138035.1-202	lncRNA
72	-0.45	0.15	-2.9	0.0038	NA	AD	iso	ENST00000449660.5_2	TNFRSF14-AS1	TNFRSF14-AS1-205	lncRNA
180	0.42	0.19	2.2	0.026	NA	AD	iso	ENST00000659507.1_1	FAM13A-AS1	FAM13A-AS1-204	lncRNA
120	0.53	0.2	2.7	0.007	NA	AD	iso	ENST00000659781.1_2	LINC02432	LINC02432-207	lncRNA
7.3	-1.4	0.49	-2.7	0.0062	NA	AD	iso	ENST00000520885.1_3	AC040970.1	AC040970.1-201	lncRNA
73	0.61	0.29	2.1	0.033	NA	AD	iso	ENST00000497872.2	AL928768.3	AL928768.3-001	lncRNA
57	0.5	0.2	2.5	0.012	NA	AD	iso	ENST00000524003.1_2	OTUD6B-AS1	OTUD6B-AS1-202	lncRNA
18	-0.46	0.18	-2.6	0.01	NA	AD	iso	ENST00000529296.1_1	AP001816.1	AP001816.1-202	lncRNA
38	-0.44	0.22	-2	0.047	NA	AD	iso	ENST00000526996.1_1	AC008750.2	AC008750.2-201	lncRNA
64	-0.45	0.22	-2.1	0.038	NA	AD	iso	ENST00000532688.1_1	AC008750.2	AC008750.2-202	lncRNA
33	0.43	0.19	2.3	0.024	NA	AD	iso	ENST00000556002.5_3	PSMA3-AS1	PSMA3-AS1-210	lncRNA
32	-0.49	0.19	-2.6	0.0094	NA	AD	iso	ENST00000655599.1_2	AC009120.2	AC009120.2-207	lncRNA
16	-0.4	0.16	-2.5	0.012	NA	AD	iso	ENST00000565401.1_2	AC009041.1	AC009041.1-201	lncRNA
63	-0.46	0.21	-2.2	0.029	NA	AD	iso	ENST00000563863.5_2	CEROX1	CEROX1-203	lncRNA
45	-0.39	0.16	-2.5	0.013	NA	AD	iso	ENST00000572574.5_3	MMP25-AS1	MMP25-AS1-204	lncRNA
27	-0.42	0.13	-3.2	0.0014	NA	AD	iso	ENST00000615535.1_1	SNHG22	SNHG22-202	lncRNA
7.6	0.47	0.19	2.4	0.015	NA	AD	iso	ENST00000599274.1_1	AC011445.2	AC011445.2-201	lncRNA
130	0.4	0.14	3	0.0031	NA	AD	iso	ENST00000602412.1	RP11-343N15.5	RP11-343N15.5-001	lncRNA
9.9	0.48	0.18	2.7	0.0062	NA	AD	iso	ENST00000602615.1_1	AL606834.2	AL606834.2-201	lncRNA
68	0.4	0.17	2.4	0.017	NA	AD	iso	ENST00000602304.1_1	AC007728.3	AC007728.3-201	lncRNA
13	0.46	0.18	2.5	0.013	NA	AD	iso	ENST00000609724.1_1	AC116651.1	AC116651.1-201	lncRNA
150	0.7	0.32	2.2	0.027	NA	AD	iso	ENST00000649802.1_1	AL671762.1	AL671762.1-201	lncRNA
38	1.1	0.38	2.9	0.0038	1	MCI	gene	ENSG00000234665.9_9	LERFS	LERFS	lncRNA
6.4	-0.4	0.18	-2.3	0.024	1	MCI	gene	ENSG00000269970.1_7	AL162424.1	AL162424.1	lncRNA
62	0.51	0.22	2.4	0.017	1	MCI	gene	ENSG00000275491.1_6	LINC01730	LINC01730	lncRNA
51	0.45	0.22	2	0.046	1	MCI	iso	ENST00000426161.6_3	FLVCR1-DT	FLVCR1-DT-203	lncRNA
9.8	-0.68	0.3	-2.3	0.024	1	MCI	iso	ENST00000446528.6_2	CCDC18-AS1	CCDC18-AS1-215	lncRNA
31	0.54	0.23	2.4	0.018	1	MCI	iso	ENST00000622799.1_2	AL157392.3	AL157392.3-238	lncRNA
21	0.4	0.18	2.2	0.026	1	MCI	iso	ENST00000551432.5_2	PCED1B-AS1	PCED1B-AS1-207	lncRNA
6.3	-0.38	0.18	-2.2	0.03	1	MCI	iso	ENST00000602325.1_1	AL162424.1	AL162424.1-201	lncRNA
62	0.52	0.22	2.4	0.017	1	MCI	iso	ENST00000613868.1_1	LINC01730	LINC01730-201	lncRNA
62	-0.8	0.21	-3.7	0.00019	0.14	SCD	gene	ENSG00000225964.6_7	NRIR	NRIR	lncRNA
24	-0.44	0.16	-2.8	0.0047	0.48	SCD	gene	ENSG00000229152.2_7	ANKRD10-IT1	ANKRD10-IT1	lncRNA
6.3	-0.4	0.14	-2.9	0.0041	0.44	SCD	gene	ENSG00000235313.1_6	HM13-IT1	HM13-IT1	lncRNA
18	0.52	0.17	3	0.0028	0.37	SCD	gene	ENSG00000257139.1_7	LINC02821	LINC02821	lncRNA
4.2	-0.4	0.2	-2	0.042	0.96	SCD	gene	ENSG00000265393.1_6	AC084125.4	AC084125.4	lncRNA
3	-0.53	0.21	-2.5	0.012	0.71	SCD	gene	ENSG00000269899.1_7	AC025857.2	AC025857.2	lncRNA
77	-0.45	0.2	-2.2	0.026	0.86	SCD	gene	ENSG00000270972.1_6	AC136475.9	AC136475.9	lncRNA
32	-0.44	0.2	-2.2	0.025	0.85	SCD	gene	ENSG00000286342.1_1	AC073210.3	AC073210.3	lncRNA
25	-0.73	0.22	-3.3	0.0011	0.43	SCD	iso	ENST00000366140.6_3	NRIR	NRIR-201	lncRNA
24	-0.44	0.16	-2.7	0.0068	0.68	SCD	iso	ENST00000426991.2_3	ANKRD10-IT1	ANKRD10-IT1-201	lncRNA
6.2	-0.39	0.14	-2.8	0.0049	0.65	SCD	iso	ENST00000421894.1_1	HM13-IT1	HM13-IT1-201	lncRNA
7.4	0.52	0.23	2.3	0.021	0.87	SCD	iso	ENST00000416869.1_2	BX284668.5	BX284668.5-202	lncRNA
3.5	-0.4	0.2	-2	0.044	0.92	SCD	iso	ENST00000425881.1_2	AC004865.2	AC004865.2-201	lncRNA
17	0.53	0.17	3	0.0023	0.51	SCD	iso	ENST00000552324.1_1	LINC02821	LINC02821-201	lncRNA
42	0.6	0.28	2.2	0.031	0.9	SCD	iso	ENST00000663393.1_1	LINC00667	LINC00667-227	lncRNA
4.2	-0.39	0.2	-2	0.045	0.93	SCD	iso	ENST00000580385.1_1	AC084125.4	AC084125.4-201	lncRNA
3	-0.52	0.21	-2.5	0.014	0.84	SCD	iso	ENST00000602711.1_1	AC025857.2	AC025857.2-201	lncRNA
75	-0.45	0.2	-2.2	0.027	0.88	SCD	iso	ENST00000605240.1_1	AC136475.9	AC136475.9-201	lncRNA
36	0.41	0.16	2.5	0.012	0.82	SCD	iso	ENST00000647202.1_2	AC005280.2	AC005280.2-201	lncRNA
21	-0.44	0.21	-2.1	0.035	0.9	SCD	iso	ENST00000653683.1_1	AC073210.3	AC073210.3-203	lncRNA

## Sheet: Table S6
Table S6. Differentially expressed miRNAs in SCD MCI and AD
baseMean	log2FoldChange	lfcSE	stat	pvalue	padj	group	mirna	ma
1300	1	0.52	2	0.047	0.5	AD	miR-100-5p	hsa-miR-100-5p
69	-0.38	0.16	-2.4	0.016	0.43	AD	miR-103a-2-5p	hsa-miR-103a-2-5p
5	0.47	0.24	2	0.046	0.5	AD	miR-12136	hsa-miR-12136
14000	0.6	0.24	2.5	0.014	0.43	AD	miR-125b-5p	hsa-miR-125b-5p
46	-0.54	0.19	-2.8	0.005	0.43	AD	miR-130a-5p	hsa-miR-130a-5p
52	-0.52	0.24	-2.2	0.029	0.45	AD	miR-15a-3p	hsa-miR-15a-3p
24	-0.73	0.19	-3.8	0.00016	0.13	AD	miR-182-3p	hsa-miR-182-3p
5.4	0.67	0.27	2.5	0.012	0.43	AD	miR-184	hsa-miR-184
100	-0.41	0.2	-2	0.041	0.49	AD	miR-186-3p	hsa-miR-186-3p
89	-0.56	0.18	-3.1	0.002	0.36	AD	miR-188-5p	hsa-miR-188-5p
20	-0.7	0.23	-3.1	0.0022	0.36	AD	miR-188-3p	hsa-miR-188-3p
4	-0.65	0.28	-2.3	0.022	0.43	AD	miR-196b-3p	hsa-miR-196b-3p
1300	-0.42	0.17	-2.5	0.013	0.43	AD	miR-199a-5p	hsa-miR-199a-5p
43	-0.4	0.19	-2.1	0.035	0.48	AD	miR-19b-1-5p	hsa-miR-19b-1-5p
180000	-0.57	0.23	-2.5	0.013	0.43	AD	miR-19b-3p	hsa-miR-19b-3p
4.9	0.72	0.28	2.6	0.011	0.43	AD	miR-3188	hsa-miR-3188
24	-0.79	0.33	-2.4	0.017	0.43	AD	miR-33a-5p	hsa-miR-33a-5p
12	-0.55	0.26	-2.2	0.03	0.45	AD	miR-33a-3p	hsa-miR-33a-3p
93	-0.72	0.3	-2.3	0.019	0.43	AD	miR-33b-5p	hsa-miR-33b-5p
45	-0.61	0.31	-2	0.047	0.5	AD	miR-3611	hsa-miR-3611
11	0.71	0.23	3.1	0.0017	0.36	AD	miR-3614-5p	hsa-miR-3614-5p
150	-0.4	0.17	-2.3	0.019	0.43	AD	miR-362-3p	hsa-miR-362-3p
7.7	-0.5	0.25	-2	0.047	0.5	AD	miR-3657	hsa-miR-3657
11	-0.49	0.22	-2.3	0.024	0.43	AD	miR-3688-5p	hsa-miR-3688-5p
43	-0.45	0.13	-3.4	0.00073	0.3	AD	miR-378d	hsa-miR-378d
17	0.45	0.22	2	0.042	0.49	AD	miR-379-5p	hsa-miR-379-5p
9.1	0.48	0.22	2.1	0.032	0.47	AD	miR-382-3p	hsa-miR-382-3p
12	0.45	0.22	2.1	0.04	0.48	AD	miR-3960	hsa-miR-3960
19	0.56	0.25	2.3	0.024	0.43	AD	miR-432-5p	hsa-miR-432-5p
14	0.64	0.28	2.3	0.02	0.43	AD	miR-449a	hsa-miR-449a
7	-0.44	0.2	-2.2	0.027	0.44	AD	miR-4714-5p	hsa-miR-4714-5p
9.2	0.7	0.27	2.6	0.0095	0.43	AD	miR-493-5p	hsa-miR-493-5p
87	-0.63	0.24	-2.6	0.0091	0.43	AD	miR-548c-3p	hsa-miR-548c-3p
130	-0.5	0.2	-2.5	0.012	0.43	AD	miR-548d-3p	hsa-miR-548d-3p
180	-0.51	0.24	-2.1	0.035	0.48	AD	miR-590-5p	hsa-miR-590-5p
200	-0.38	0.16	-2.4	0.015	0.43	AD	miR-627-3p	hsa-miR-627-3p
730	-0.39	0.19	-2.1	0.036	0.48	AD	miR-627-5p	hsa-miR-627-5p
19	-0.4	0.2	-2	0.046	0.5	AD	miR-652-5p	hsa-miR-652-5p
130	-0.39	0.15	-2.6	0.009	0.43	AD	miR-660-3p	hsa-miR-660-3p
7.8	-0.45	0.19	-2.4	0.018	0.43	AD	miR-6758-3p	hsa-miR-6758-3p
44	-0.41	0.15	-2.8	0.005	0.43	AD	miR-6764-3p	hsa-miR-6764-3p
5.4	0.66	0.25	2.7	0.008	0.43	AD	miR-6884-5p	hsa-miR-6884-5p
10	1.2	0.44	2.8	0.0058	0.43	AD	miR-708-5p	hsa-miR-708-5p
5	0.39	0.18	2.2	0.03	0.74	SCD	miR-12136	hsa-miR-12136
14000	0.4	0.19	2.1	0.034	0.74	SCD	miR-125b-5p	hsa-miR-125b-5p
6	0.4	0.15	2.6	0.0083	0.74	SCD	miR-128-1-5p	hsa-miR-128-1-5p
27	-0.43	0.18	-2.5	0.014	0.74	SCD	miR-204-5p	hsa-miR-204-5p
6.5	-0.41	0.17	-2.5	0.013	0.74	SCD	miR-29b-1-5p	hsa-miR-29b-1-5p
23	-0.48	0.24	-2	0.047	0.74	SCD	miR-33a-5p	hsa-miR-33a-5p
7.7	-0.55	0.19	-2.9	0.0043	0.74	SCD	miR-3614-3p	hsa-miR-3614-3p
2300	-0.4	0.2	-2	0.05	0.74	SCD	miR-424-5p	hsa-miR-424-5p
21	-0.43	0.2	-2.2	0.03	0.74	SCD	miR-548an	hsa-miR-548an
14	-0.5	0.21	-2.4	0.018	0.74	SCD	miR-582-5p	hsa-miR-582-5p
25	0.71	0.29	2.5	0.014	0.74	SCD	miR-6826-3p	hsa-miR-6826-3p
44	-0.4	0.19	-2.1	0.032	1	MCI	miR-1255b-2-3p	hsa-miR-1255b-2-3p
11	1	0.28	3.6	0.00035	0.29	MCI	miR-196a-5p	hsa-miR-196a-5p
10	-0.68	0.23	-2.9	0.0032	1	MCI	miR-205-5p	hsa-miR-205-5p
250	-0.4	0.14	-2.8	0.005	1	MCI	miR-641	hsa-miR-641

## Sheet: Tbale S7
Table S7. miRNAs that target genes in the type I IFN signaling pathway
Category	ID	Name	Source	p-value	q-value Bonferroni	q-value FDR B&H	q-value FDR B&Y	Hit Count in Query List	Hit Count in Genome	Hit in Query List
MicroRNA	hsa-miR-146a-5p:Functional MTI	Functional MTI	miRTarbase	2.163e-18	6.308e-15	6.308e-15	5.397e-14	13	202	FADD,IRAK1,IFITM1,IRF7,IFI27,IFIT1,IFIT3,STAT1,RSAD2,ISG15,IFITM3,OASL,MX2
MicroRNA	hsa-miR-595		MirDB	1.799e-09	5.249e-06	2.624e-06	2.245e-05	8	241	IFNA4,IFNA7,IFNA10,IFNA14,IFNA16,IFNA17,CNOT7,YTHDF3
MicroRNA	hsa-miR-876-3p		MirDB	7.846e-09	2.289e-05	7.629e-06	6.527e-05	8	291	OAS3,IRF6,IFIT3,IFNA4,IFNA7,IFNA14,IFNA16,IFNA17
MicroRNA	hsa-miR-323a-5p		MirDB	3.777e-07	0.001102	0.0002754	0.002356	6	200	UBE2K,IFNA4,IFNA7,IFNA14,IFNA16,IFNA17
MicroRNA	hsa-miR-6880-5p		MirDB	9.828e-07	0.002867	0.0005733	0.004905	7	377	OAS2,IFITM2,IFIT2,IFIT1,TYK2,PTPN1,MX2
MicroRNA	hsa-miR-4670-3p:Functional MTI (Weak)	Functional MTI (Weak)	miRTarbase	7.407e-06	0.02161	0.003601	0.03081	4	89	UBE2K,HLA-A,OAS2,MX2
MicroRNA	hsa-miR-4693-3p		MirDB	1.133e-05	0.03306	0.004723	0.04041	5	210	SP100,GBP2,IRF5,OASL,IFI6
MicroRNA	hsa-miR-5089-3p		MirDB	1.614e-05	0.04707	0.00548	0.04688	5	226	IRF2,TRIM6,IFNAR2,PTPN1,YTHDF3
MicroRNA	hsa-miR-3652:Functional MTI (Weak)	Functional MTI (Weak)	miRTarbase	1.932e-05	0.05635	0.00548	0.04688	6	397	HLA-E,ADAR,IFNAR1,TTLL12,PTPN2,MAVS
MicroRNA	hsa-miR-4430:Functional MTI (Weak)	Functional MTI (Weak)	miRTarbase	1.932e-05	0.05635	0.00548	0.04688	6	397	HLA-E,ADAR,IFNAR1,TTLL12,PTPN2,MAVS
MicroRNA	hsa-miR-4457		MirDB	2.251e-05	0.06566	0.00548	0.04688	6	408	FADD,IRF2,ADAR,CNOT7,IP6K2,HSP90AB1
MicroRNA	hsa-miR-5691		MirDB	2.442e-05	0.07124	0.00548	0.04688	6	414	MYD88,GBP2,IRF2,SAMHD1,LSM14A,YTHDF2
MicroRNA	hsa-miR-6805-3p		MirDB	2.442e-05	0.07124	0.00548	0.04688	6	414	MYD88,GBP2,IRF2,SAMHD1,LSM14A,YTHDF2
MicroRNA	hsa-miR-662		MirDB	3.63e-05	0.1059	0.007564	0.06471	3	46	GBP2,IRF6,NLRC5
MicroRNA	hsa-miR-26a-5p:Functional MTI	Functional MTI	miRTarbase	4.229e-05	0.1234	0.008189	0.07007	6	457	WNT5A,IRF4,IFNB1,TTLL12,SETD2,LSM14A
MicroRNA	mmu-miR-6960-5p		MirDB	4.788e-05	0.1397	0.008189	0.07007	4	143	IRF8,FADD,ADAR,YTHDF3
MicroRNA	mmu-miR-8104		MirDB	4.919e-05	0.1435	0.008189	0.07007	4	144	IRF8,FADD,ADAR,YTHDF3
MicroRNA	mmu-miR-7093-5p		MirDB	5.053e-05	0.1474	0.008189	0.07007	4	145	IRF8,FADD,ADAR,YTHDF3
MicroRNA	hsa-miR-4722-5p		MirDB	6.073e-05	0.1771	0.008914	0.07626	6	488	SAMHD1,IFNAR2,JAK1,SETD2,MAVS,MX2
MicroRNA	hsa-miR-8062		MirDB	6.112e-05	0.1783	0.008914	0.07626	5	299	FADD,ADAR,MAVS,LSM14A,YTHDF2
MicroRNA	hsa-miR-203a-3p:Functional MTI	Functional MTI	miRTarbase	7.027e-05	0.205	0.009605	0.08218	5	308	MYD88,IFIT1,STAT1,ABCE1,TBK1
MicroRNA	hsa-miR-125a-3p:Functional MTI	Functional MTI	miRTarbase	7.244e-05	0.2113	0.009605	0.08218	5	310	IRF1,IRF4,TTLL12,MUL1,IP6K2
MicroRNA	mmu-miR-302c-3p		MirDB	0.0001211	0.3533	0.01536	0.1314	5	346	WNT5A,IRF2,JAK1,IRF9,YTHDF3
MicroRNA	hsa-miR-1260a		MirDB	0.0001365	0.3981	0.01592	0.1362	5	355	PTPN1,CACTIN,PTPN11,NLRC5,YTHDF2
MicroRNA	hsa-miR-1260b		MirDB	0.0001365	0.3981	0.01592	0.1362	5	355	PTPN1,CACTIN,PTPN11,NLRC5,YTHDF2
MicroRNA	hsa-miR-635		MirDB	0.0001465	0.4272	0.01629	0.1394	4	191	IRAK1,IFNAR1,JAK1,MAVS
MicroRNA	hsa-miR-502-5p:Functional MTI	Functional MTI	miRTarbase	0.0001508	0.4398	0.01629	0.1394	3	74	IRF1,OAS3,IFI27
MicroRNA	hsa-miR-219a-1-3p		MirDB	0.0001617	0.4717	0.01685	0.1441	4	196	SP100,GBP2,IFIT3,XAF1
MicroRNA	hsa-miR-6774-5p		MirDB	0.0001714	0.4999	0.01724	0.1475	4	199	IRAK1,IFNAR1,JAK1,MAVS
MicroRNA	mmu-miR-3095-3p		MirDB	0.000178	0.5194	0.01731	0.1481	4	201	METTL3,IRAK1,IFIT2,ABCE1
MicroRNA	hsa-miR-504-3p:Functional MTI (Weak)	Functional MTI (Weak)	miRTarbase	0.0002133	0.6223	0.01876	0.1605	5	391	HLA-E,IFITM1,IFNAR2,TTLL12,PTPN2
MicroRNA	hsa-miR-6873-5p		MirDB	0.0002159	0.6297	0.01876	0.1605	5	392	OAS1,PTPN11,XAF1,YTHDF2,HSP90AB1
MicroRNA	hsa-miR-3135b:Functional MTI (Weak)	Functional MTI (Weak)	miRTarbase	0.000221	0.6446	0.01876	0.1605	5	394	HLA-E,TTLL12,CDC37,PTPN2,MAVS
MicroRNA	hsa-miR-148a-5p:Functional MTI (Weak)	Functional MTI (Weak)	miRTarbase	0.0002272	0.6628	0.01876	0.1605	3	85	OAS2,TTLL12,MX2
MicroRNA	hsa-miR-6858-3p		MirDB	0.0002301	0.6713	0.01876	0.1605	4	215	IRF1,IRF5,IRF6,RSAD2
MicroRNA	mmu-miR-669k-5p		MirDB	0.0002315	0.6753	0.01876	0.1605	5	398	UBE2K,IRF1,XAF1,YTHDF2,YTHDF3
MicroRNA	hsa-miR-6861-5p		MirDB	0.0002599	0.7582	0.01948	0.1667	4	222	IRAK1,RNASEL,NLRC5,IP6K2
MicroRNA	hsa-miR-6834-5p		MirDB	0.0002644	0.7713	0.01948	0.1667	4	223	SP100,SHMT2,IRF2,MAVS
MicroRNA	hsa-miR-4264		MirDB	0.0002774	0.8091	0.01948	0.1667	5	414	HLA-E,IRF6,CNOT7,MMP12,IP6K2
MicroRNA	hsa-miR-7158-3p		MirDB	0.0002781	0.8114	0.01948	0.1667	4	226	SP100,GBP2,IRF6,YTHDF3
MicroRNA	hsa-miR-7114-5p		MirDB	0.0002805	0.8181	0.01948	0.1667	5	415	WNT5A,HLA-E,JAK1,ABCE1,LSM14A
MicroRNA	hsa-miR-4499		MirDB	0.0002805	0.8181	0.01948	0.1667	5	415	IRF6,ABCE1,LSM14A,YTHDF3,IP6K2
MicroRNA	mmu-miR-6937-3p		MirDB	0.0002963	0.8642	0.0201	0.1719	5	420	UBE2K,JAK1,MAVS,MUL1,YTHDF3
MicroRNA	hsa-miR-3620-3p:Functional MTI (Weak)	Functional MTI (Weak)	miRTarbase	0.0003153	0.9197	0.02047	0.1752	3	95	HLA-E,MAVS,YTHDF3
MicroRNA	hsa-miR-6823-5p		MirDB	0.0003225	0.9406	0.02047	0.1752	4	235	HLA-G,IFNA8,SETD2,MAVS
MicroRNA	hsa-miR-4735-3p:Functional MTI (Weak)	Functional MTI (Weak)	miRTarbase	0.0003251	0.9484	0.02047	0.1752	3	96	SP100,IRF2,IFNAR2
MicroRNA	mmu-miR-12196-3p		MirDB	0.0003299	0.9622	0.02047	0.1752	5	430	UBE2K,JAK1,MAVS,MUL1,YTHDF3
MicroRNA	hsa-miR-374a-3p		MirDB	0.0003477	1	0.02113	0.1808	5	435	UBE2K,FADD,IFNA1,CNOT7,XAF1
MicroRNA	mmu-miR-3089-3p		MirDB	0.0003659	1	0.02178	0.1864	4	243	UBE2K,IRF4,STAT1,TRIM56
MicroRNA	hsa-miR-4776-3p		MirDB	0.0003935	1	0.02296	0.1964	5	447	SP100,IRF6,CDC37,EGR1,YTHDF3
MicroRNA	hsa-miR-4314		MirDB	0.0004016	1	0.02297	0.1965	5	449	SHMT2,IRF2,JAK1,OASL,IFI6
MicroRNA	hsa-miR-6860		MirDB	0.0004223	1	0.02369	0.2027	5	454	IFI35,STAT2,PTPN2,MAVS,MUL1
MicroRNA	hsa-miR-6810-5p:Functional MTI (Weak)	Functional MTI (Weak)	miRTarbase	0.0004347	1	0.0239	0.2045	3	106	HLA-A,HLA-C,HSP90AB1
MicroRNA	hsa-miR-320e		MirDB	0.0004584	1	0.0239	0.2045	4	258	IRF6,SAMHD1,CNOT7,YTHDF3
MicroRNA	hsa-miR-296-3p:Functional MTI	Functional MTI	miRTarbase	0.0004584	1	0.0239	0.2045	4	258	HLA-E,IRF1,TTLL12,HSP90AB1
MicroRNA	hsa-miR-3605-5p:Functional MTI (Weak)	Functional MTI (Weak)	miRTarbase	0.0004591	1	0.0239	0.2045	3	108	ADAR,TTLL12,IFITM3
MicroRNA	mmu-miR-3061-5p		MirDB	0.0004716	1	0.0239	0.2045	3	109	PTPN2,ABCE1,XAF1
MicroRNA	hsa-miR-5009-3p		MirDB	0.0004752	1	0.0239	0.2045	5	466	UBE2K,IRF4,TRIM6,IFNAR1,PTPN2
MicroRNA	hsa-miR-381-5p:Functional MTI (Weak)	Functional MTI (Weak)	miRTarbase	0.0005031	1	0.02487	0.2128	2	24	IFNAR1,IFNAR2
MicroRNA	hsa-miR-520e-5p		MirDB	0.000528	1	0.02549	0.2181	5	477	UBE2K,WNT5A,ISG20,ABCE1,YTHDF3
MicroRNA	hsa-miR-4778-5p		MirDB	0.000533	1	0.02549	0.2181	5	478	IFNA2,ABCE1,CNOT7,LSM14A,IFI6
MicroRNA	hsa-miR-4530		MirDB	0.0005534	1	0.02604	0.2228	5	482	UBE2K,ADAR,IFNAR1,RSAD2,OASL
MicroRNA	hsa-miR-18b-5p:Functional MTI	Functional MTI	miRTarbase	0.0005654	1	0.02618	0.224	3	116	SP100,IRF2,IFNAR2
MicroRNA	hsa-miR-10392-3p		MirDB	0.0005913	1	0.02695	0.2306	2	26	SHFL,IRAK1
MicroRNA	mmu-miR-6918-5p		MirDB	0.0006238	1	0.02799	0.2395	5	495	FADD,IRF1,OAS3,IRF9,PTPN11
MicroRNA	hsa-miR-6783-5p		MirDB	0.0006409	1	0.02833	0.2424	5	498	GBP2,OAS1,OAS2,IRF4,IP6K2
MicroRNA	hsa-miR-5087		MirDB	0.0006651	1	0.02876	0.2461	4	285	SP100,GBP2,STAT1,XAF1
MicroRNA	hsa-miR-762:Functional MTI	Functional MTI	miRTarbase	0.0006705	1	0.02876	0.2461	3	123	HLA-B,IRF7,CDC37
MicroRNA	mmu-miR-6392-3p		MirDB	0.0006865	1	0.02902	0.2483	2	28	WNT5A,IRF8
MicroRNA	hsa-miR-3655		MirDB	0.0007367	1	0.0307	0.2627	2	29	IFNA8,CNOT7
MicroRNA	hsa-miR-1273f:Functional MTI (Weak)	Functional MTI (Weak)	miRTarbase	0.0007561	1	0.03106	0.2658	4	295	HLA-A,OAS3,IFNAR1,TRIM56
MicroRNA	hsa-miR-1324:Functional MTI (Weak)	Functional MTI (Weak)	miRTarbase	0.0008048	1	0.03261	0.279	3	131	IRF4,ADAR,MAVS
MicroRNA	hsa-miR-6793-3p		MirDB	0.0008452	1	0.03377	0.289	4	304	CDC37,PTPN11,MAVS,IP6K2
MicroRNA	hsa-miR-5192:Functional MTI (Weak)	Functional MTI (Weak)	miRTarbase	0.0008592	1	0.03387	0.2898	3	134	SHMT2,OAS2,CDC37
MicroRNA	mmu-miR-5709-3p		MirDB	0.0008978	1	0.03492	0.2988	4	309	UBE2K,IFIT2,PTPN2,MUL1
MicroRNA	hsa-miR-26b-3p		MirDB	0.0009415	1	0.03614	0.3092	4	313	IFIT1,STAT2,IFNAR1,YTHDF2
MicroRNA	hsa-miR-2392:Functional MTI (Weak)	Functional MTI (Weak)	miRTarbase	0.0009751	1	0.03629	0.3105	3	140	ADAR,IFNAR2,TTLL12
MicroRNA	hsa-miR-1286		MirDB	0.0009753	1	0.03629	0.3105	4	316	MYD88,SETD2,MAVS,OASL
MicroRNA	hsa-miR-624-3p		MirDB	0.0009867	1	0.03629	0.3105	4	317	SP100,WNT5A,IFNAR1,CNOT7
MicroRNA	mmu-miR-7085-5p		MirDB	0.0009953	1	0.03629	0.3105	3	141	IRAK1,IRF2,XAF1
MicroRNA	hsa-miR-6817-3p:Functional MTI (Weak)	Functional MTI (Weak)	miRTarbase	0.001057	1	0.0367	0.314	4	323	MYD88,HLA-C,SAMHD1,MX2
MicroRNA	hsa-miR-6800-3p		MirDB	0.001057	1	0.0367	0.314	3	144	HLA-A,HLA-B,PTPN1
MicroRNA	mmu-miR-3088-5p		MirDB	0.001057	1	0.0367	0.314	3	144	UBE2K,IRF1,LSM14A
MicroRNA	hsa-miR-3672:Functional MTI (Weak)	Functional MTI (Weak)	miRTarbase	0.001069	1	0.0367	0.314	4	324	HLA-A,HLA-C,TTLL12,PTPN2
MicroRNA	hsa-miR-6864-3p:Functional MTI (Weak)	Functional MTI (Weak)	miRTarbase	0.001069	1	0.0367	0.314	4	324	HLA-A,HLA-C,TTLL12,PTPN2
MicroRNA	mmu-miR-1251-3p		MirDB	0.001209	1	0.04004	0.3426	4	335	SHFL,IRF1,PTPN2,YTHDF3
MicroRNA	mmu-miR-222-3p		MirDB	0.001222	1	0.04004	0.3426	4	336	IRF2,ADAR,STAT1,YTHDF3
MicroRNA	hsa-miR-1225-3p:Functional MTI (Weak)	Functional MTI (Weak)	miRTarbase	0.001235	1	0.04004	0.3426	3	152	IRF4,PTPN6,IFI6
MicroRNA	mmu-miR-221-3p		MirDB	0.001236	1	0.04004	0.3426	4	337	IRF2,ADAR,STAT1,YTHDF3
MicroRNA	mmu-miR-3101-3p		MirDB	0.001249	1	0.04004	0.3426	4	338	METTL3,UBE2K,LSM14A,YTHDF2
MicroRNA	mmu-miR-7223-5p		MirDB	0.001249	1	0.04004	0.3426	4	338	METTL3,UBE2K,LSM14A,YTHDF2
MicroRNA	hsa-miR-18b-3p		MirDB	0.001307	1	0.04136	0.3538	3	155	UBE2K,SHMT2,IP6K2
MicroRNA	hsa-miR-519b-3p:Functional MTI	Functional MTI	miRTarbase	0.001332	1	0.04136	0.3538	4	344	IRF2,ADAR,IFNAR2,MAVS
MicroRNA	hsa-miR-6876-3p:Functional MTI (Weak)	Functional MTI (Weak)	miRTarbase	0.001333	1	0.04136	0.3538	2	39	HLA-B,HSP90AB1
MicroRNA	hsa-miR-501-5p:Functional MTI	Functional MTI	miRTarbase	0.00138	1	0.04194	0.3588	3	158	STAT1,TTLL12,HSP90AB1
MicroRNA	hsa-miR-152-3p:Functional MTI	Functional MTI	miRTarbase	0.00138	1	0.04194	0.3588	3	158	HLA-A,HLA-C,HLA-G
MicroRNA	hsa-miR-519a-3p:Functional MTI	Functional MTI	miRTarbase	0.001405	1	0.04224	0.3614	4	349	IRF2,ADAR,IFNAR2,MAVS
MicroRNA	hsa-miR-519c-3p:Functional MTI	Functional MTI	miRTarbase	0.001419	1	0.04225	0.3615	4	350	IRF2,ADAR,IFNAR2,MAVS
MicroRNA	hsa-miR-626:Non-Functional MTI	Non-Functional MTI	miRTarbase	0.001472	1	0.04316	0.3692	2	41	HLA-B,HSP90AB1
MicroRNA	hsa-miR-1304-5p		MirDB	0.00148	1	0.04316	0.3692	4	354	SP100,UBE2K,PTPN11,NLRC5
MicroRNA	mmu-miR-8114		MirDB	0.001509	1	0.04358	0.3728	3	163	IRF8,IFIT2,YTHDF3
MicroRNA	hsa-miR-520d-5p:Functional MTI (Weak)	Functional MTI (Weak)	miRTarbase	0.001562	1	0.04425	0.3786	3	165	PTPN2,PTPN6,RNASEL
MicroRNA	hsa-miR-6802-3p		MirDB	0.001562	1	0.04425	0.3786	3	165	IRF1,IFI27,PTPN11
MicroRNA	hsa-miR-552-3p:Functional MTI (Weak)	Functional MTI (Weak)	miRTarbase	0.001617	1	0.04526	0.3873	3	167	IFITM1,TTLL12,IFITM3
MicroRNA	mmu-miR-6957-3p		MirDB	0.001645	1	0.04526	0.3873	3	168	OAS3,STAT1,MMP12
MicroRNA	hsa-miR-218-2-3p		MirDB	0.001645	1	0.04526	0.3873	3	168	WNT5A,GBP2,PTPN2
MicroRNA	mmu-miR-16-2-3p		MirDB	0.001673	1	0.04536	0.3881	3	169	WNT5A,IFNAR1,YTHDF2
MicroRNA	hsa-miR-4716-5p		MirDB	0.001687	1	0.04536	0.3881	4	367	UBE2K,IFNA4,IFNA16,IFNA21
MicroRNA	mmu-miR-300-5p		MirDB	0.001755	1	0.04536	0.3881	4	371	SHFL,LSM14A,MMP12,YTHDF3
MicroRNA	mmu-miR-6940-3p		MirDB	0.001759	1	0.04536	0.3881	3	172	IRF2,TTLL12,MMP12
MicroRNA	hsa-miR-524-5p:Functional MTI	Functional MTI	miRTarbase	0.001759	1	0.04536	0.3881	3	172	PTPN2,PTPN6,RNASEL
MicroRNA	hsa-miR-1228-5p:Functional MTI (Weak)	Functional MTI (Weak)	miRTarbase	0.001771	1	0.04536	0.3881	2	45	IFNAR2,CDC37
MicroRNA	hsa-miR-3674		MirDB	0.001772	1	0.04536	0.3881	4	372	IFITM2,IFITM3,TRIM56,LSM14A
MicroRNA	hsa-miR-17-3p:Functional MTI	Functional MTI	miRTarbase	0.001788	1	0.04536	0.3881	3	173	NLRC5,LSM14A,HSP90AB1
MicroRNA	mmu-miR-383-5p		MirDB	0.001788	1	0.04536	0.3881	3	173	SHMT2,IRF1,TYK2
MicroRNA	hsa-miR-4312		MirDB	0.001848	1	0.04638	0.3968	3	175	MYD88,IRF6,CNOT7
MicroRNA	mmu-miR-7051-3p		MirDB	0.00186	1	0.04638	0.3968	4	377	FADD,IRAK1,TRIM56,XAF1
MicroRNA	mmu-miR-666-3p		MirDB	0.001896	1	0.04648	0.3977	4	379	IRF3,PTPN2,RSAD2,YTHDF2
MicroRNA	hsa-miR-3116		MirDB	0.001896	1	0.04648	0.3977	4	379	IRF8,MAVS,LSM14A,IFI6
MicroRNA	hsa-miR-4674		MirDB	0.001939	1	0.04714	0.4033	3	178	JAK1,MAVS,OASL
MicroRNA	hsa-miR-4704-3p		MirDB	0.00197	1	0.04747	0.4061	4	383	SP100,IFNB1,EGR1,CNOT7
MicroRNA	mmu-miR-6540-3p		MirDB	0.001988	1	0.04747	0.4061	4	384	UBE2K,ADAR,SETD2,PTPN11
MicroRNA	hsa-miR-10400-3p		MirDB	0.002002	1	0.04747	0.4061	3	180	JAK1,MAVS,OASL
MicroRNA	hsa-miR-5190		MirDB	0.002026	1	0.04766	0.4077	4	386	UBE2K,ADAR,IFIT2,JAK1
MicroRNA	hsa-miR-6824-5p		MirDB	0.002065	1	0.0482	0.4124	3	182	OAS1,OAS2,IFNAR1
MicroRNA	hsa-miR-4693-5p:Functional MTI (Weak)	Functional MTI (Weak)	miRTarbase	0.002096	1	0.04853	0.4152	2	49	STAT1,LSM14A

## Sheet: Table S9
TableS9. Demographic characteristics of each participant
ID	Diagnosis	Gender	Age	Age_group	Education	MMSE	MoCA_B	ACEIII_score	apoe4	RIN
B0370	MCI	F	55	middle_aged	10	26	22	2	e3e3	8.7
B0381	MCI	F	65	yonger_aged	6	29	24	78	e3e4	8.9
B0382	NC	F	57	middle_aged	12	28	28	84	e3e4	8.9
B0383	NC	F	54	middle_aged	9	26	24	81	e3e4	9.2
B0390	NC	M	69	yonger_aged	18	29	28	87	e3e3	9.5
B0393	SCD	F	65	yonger_aged	10	29	26	88	e2e3	8.7
B0394	NC	F	60	yonger_aged	12	28	26	75	e3e3	8.6
B0398	AD	F	60	yonger_aged	6	22	13	39	e2e3	9
B0400	SCD	F	61	yonger_aged	12	25	26	68	e3e3	8.9
B0401	SCD	F	70	yonger_aged	10	27	19	74	e3e4	9.2
B0410	NC	M	61	yonger_aged	18	29	24	88	e3e3	9.4
B0411	NC	F	67	yonger_aged	10	27	23	77	e3e3	8.9
B0416	NC	M	75	aged	18	27	25	84	e3e3	9
B0434	MCI	F	59	middle_aged	12	29	23	69	e3e3	8.8
B0439	MCI	M	65	yonger_aged	12	26	22	70	e3e3	9.1
B0444	SCD	F	61	yonger_aged	18	27	25	83	e3e3	9.1
B0454	NC	F	63	yonger_aged	12	27	29	79	e3e4	8.8
B0458	NC	M	67	yonger_aged	18	29	26	87	e3e3	9.1
B0472	SCD	F	65	yonger_aged	9	29	26	91	e3e4	9.2
B0475	MCI	M	80	aged	18	26	26	75	e3e3	8.7
B0476	NC	M	64	yonger_aged	12	29	26	86	e3e3	8.7
B0485	MCI	F	75	aged	12	25	22	75	e3e4	8.7
B0492	NC	F	78	aged	18	25	21	78	e3e3	8.4
B0494	NC	F	56	middle_aged	12	27	28	81	e3e4	8.8
B0495	NC	M	57	middle_aged	12	28	23	78	e3e3	9.2
B0502	MCI	M	74	yonger_aged	NA	28	22	78	e3e3	8.8
B0503	MCI	F	67	yonger_aged	10	30	28	81	e3e3	8.4
B0504	SCD	F	57	middle_aged	10	30	29	90	e3e3	8.8
B0505	MCI	F	78	aged	6	28	20	65	e3e3	9
B0508	MCI	F	80	aged	10	25	14	76	e3e3	9.1
B0536	NC	F	59	middle_aged	12	29	29	88	e3e3	8.7
B0550	SCD	F	80	aged	18	29	24	79	e3e4	8.3
B0553	MCI	F	62	yonger_aged	9	24	17	53	e3e3	7.5
B0571	AD	F	77	aged	12	12	6	39	e3e4	8.5
B0583	SCD	F	66	yonger_aged	12	29	28	85	e3e3	8
B0585	NC	M	64	yonger_aged	10	30	26	94	e3e3	8.1
B0588	NC	F	49	middle_aged	10	29	28	89	e3e3	7.8
B0589	AD	M	65	yonger_aged	18	21	14	54	e3e4	8.5
B0624	NC	M	73	yonger_aged	12	24	29	82	e3e3	8.4
B0640	MCI	F	64	yonger_aged	9	27	19	74	e2e3	7.9
B0657	AD	M	62	yonger_aged	9	24	19	62	e3e3	8.5
B0675	NC	F	65	yonger_aged	9	28	24	76	e4e4	8.1
B0676	NC	F	67	yonger_aged	0	28	20	56	e3e3	8.5
B0687	NC	F	52	middle_aged	12	29	28	89	e3e3	8.5
B0730	SCD	F	77	aged	10	28	26	79	e3e3	8.5
B0732	SCD	F	73	yonger_aged	12	28	24	76	e2e3	8.4
B0742	MCI	F	69	yonger_aged	10	28	28	82	e3e3	8.6
B0743	MCI	F	71	yonger_aged	10	28	26	81	e3e3	8.4
B0751	NC	M	80	aged	18	28	27	83	e2e4	9.1
B0788	SCD	M	65	yonger_aged	12	29	24	77	e3e3	8.7
B0789	SCD	F	66	yonger_aged	9	26	24	76	e2e3	8.8
B0823	AD	F	76	aged	9	19	5	34	e3e3	8.2
B0824	AD	M	64	yonger_aged	6	18	14	43	e3e4	8.1
B0825	AD	F	63	yonger_aged	6	16	7	39	e4e4	8.8
B0826	MCI	F	74	yonger_aged	6	23	20	61	e3e3	8.8
B0827	NC	M	64	yonger_aged	10	29	27	88	e3e4	8.6
B0831	NC	M	66	yonger_aged	9	28	23	81	e3e4	9.3
B0832	SCD	M	60	yonger_aged	10	28	26	79	e3e3	8.5
B0833	MCI	F	72	yonger_aged	10	26	23	70	e3e4	9
A602	AD	M	78	aged	10	17	19	62	e3e4	9.1
A604	AD	F	66	yonger_aged	9	17	9	47	e3e3	9
B0364	SCD	F	70	yonger_aged	9	25	18	68	e2e3	8.7
B0365	MCI	F	74	yonger_aged	10	26	19	55	e3e3	9.1
B0368	NC	F	75	aged	9	23	18	57	e3e3	9
B0369	SCD	M	50	middle_aged	10	30	27	96	e3e3	8.8
B0371	MCI	M	55	middle_aged	12	26	19	71	e3e3	8.8
B0372	MCI	M	62	yonger_aged	9	23	22	67	e3e3	9.1
B0373	AD	M	56	middle_aged	10	10	8	38	e3e3	8.8
B0374	NC	F	50	middle_aged	10	29	27	84	e2e3	8.8
B0375	NC	M	56	middle_aged	12	27	29	89	e2e3	9.1
B0376	AD	F	56	middle_aged	0	5	5	13	e3e3	8.5
B0377	MCI	F	64	yonger_aged	10	26	22	75	e3e4	8.5
B0378	AD	M	65	yonger_aged	9	21	19	73	e3e3	9.1
B0379	MCI	F	65	yonger_aged	10	28	25	70	e3e4	9.4
B0380	NC	F	66	yonger_aged	9	29	24	78	e3e3	8.7
B0384	NC	F	57	middle_aged	12	27	28	80	e2e4	8.7
B0385	SCD	F	62	yonger_aged	12	28	27	77	e2e3	9.2
B0386	SCD	M	67	yonger_aged	10	28	22	78	e3e3	9.7
B0387	NC	F	68	yonger_aged	10	29	25	81	e3e3	8.7
B0388	NC	M	66	yonger_aged	18	30	27	94	e3e3	8.9
B0389	NC	F	65	yonger_aged	10	29	27	85	e3e3	9.1
B0391	NC	M	62	yonger_aged	18	28	27	81	e3e4	9.4
B0392	NC	F	55	middle_aged	12	25	23	73	e3e3	9.1
B0395	MCI	M	57	middle_aged	12	28	22	78	e3e3	8.8
B0396	MCI	F	66	yonger_aged	9	25	23	69	e2e3	9.3
B0397	AD	F	69	yonger_aged	6	12	8	32	e4e4	8.9
B0399	MCI	F	70	yonger_aged	9	24	18	63	e3e4	9.1
B0402	AD	M	78	aged	18	20	11	41	e3e3	9
B0403	MCI	F	66	yonger_aged	10	26	25	74	e3e3	8.2
B0404	NC	F	52	middle_aged	10	30	29	86	e3e3	9
B0405	NC	M	51	middle_aged	10	29	25	83	e3e3	8.5
B0407	MCI	F	70	yonger_aged	9	25	17	51	e2e3	8.2
B0408	NC	M	72	yonger_aged	10	29	26	90	e3e3	8.8
B0409	NC	F	55	middle_aged	18	28	28	87	e3e3	9
B0413	NC	F	66	yonger_aged	9	29	26	75	e3e3	8.4
B0414	NC	F	66	yonger_aged	9	25	25	76	e3e3	8.8
B0415	SCD	F	72	yonger_aged	10	28	21	69	e3e3	8.4
B0417	MCI	F	57	middle_aged	12	28	21	77	e3e3	9.2
B0418	MCI	F	55	middle_aged	9	25	21	70	e3e3	9
B0419	MCI	F	63	yonger_aged	12	28	21	71	e2e3	8.8
B0420	MCI	F	77	aged	18	27	20	66	e3e3	8.9
B0421	MCI	M	79	aged	18	26	19	73	e3e3	9.3
B0422	NC	F	78	aged	10	29	26	75	e3e3	9
B0423	MCI	M	73	yonger_aged	10	26	27	76	e3e3	8.9
B0424	NC	F	73	yonger_aged	12	28	26	90	e3e3	9.3
B0425	NC	F	67	yonger_aged	12	30	26	90	e3e3	8.9
B0426	MCI	F	61	yonger_aged	9	28	26	83	e3e4	8.5
B0431	SCD	F	63	yonger_aged	6	26	18	63	e3e3	8.6
B0432	NC	F	63	yonger_aged	10	28	25	89	e3e3	8.8
B0433	NC	F	72	yonger_aged	10	27	24	67	e3e3	8.9
B0435	NC	M	60	yonger_aged	18	27	27	87	e3e3	9.2
B0436	AD	M	75	aged	18	16	17	61	e3e4	9
B0437	NC	F	56	middle_aged	0	21	16	38	e3e3	8.7
B0438	NC	F	44	youth	6	23	23	58	e3e4	9
B0440	NC	F	52	middle_aged	9	29	27	77	e3e3	9.3
B0441	SCD	F	70	yonger_aged	9	24	20	64	e3e3	8
B0442	MCI	F	71	yonger_aged	9	27	21	71	e3e3	8.7
B0443	SCD	F	60	yonger_aged	12	29	26	81	e3e3	9
B0445	NC	M	74	yonger_aged	6	19	15	56	e3e3	9
B0446	NC	F	73	yonger_aged	18	29	29	86	e3e3	9
B0448	AD	M	66	yonger_aged	6	4	13	6	e3e3	8.8
B0449	NC	F	63	yonger_aged	6	27	21	61	e2e3	8.9
B0450	NC	F	63	yonger_aged	0	20	15	35	e3e3	8.6
B0451	NC	F	60	yonger_aged	12	29	26	80	e3e4	8.4
B0452	NC	M	76	aged	18	26	23	80	e3e3	9.2
B0453	NC	F	73	yonger_aged	10	30	28	88	e3e3	8.4
B0455	NC	F	65	yonger_aged	10	29	25	75	e3e3	8.7
B0456	AD	F	75	aged	9	22	16	55	e3e4	8.7
B0457	MCI	F	68	yonger_aged	9	27	17	59	e3e3	8.7
B0459	NC	F	64	yonger_aged	10	29	25	85	e3e3	8.5
B0462	SCD	F	62	yonger_aged	9	29	26	77	e3e3	9.1
B0463	NC	M	64	yonger_aged	10	30	26	94	e3e3	8.5
B0466	MCI	F	66	yonger_aged	9	28	28	87	e3e3	9.1
B0467	MCI	F	70	yonger_aged	12	27	20	71	e3e3	8.7
B0468	NC	F	77	aged	10	29	25	86	e3e3	8.9
B0470	AD	F	79	aged	18	20	20	61	e3e4	9.2
B0471	SCD	M	63	yonger_aged	10	26	25	77	e3e3	9.6
B0473	MCI	F	61	yonger_aged	6	22	18	59	e3e3	9.1
B0474	MCI	F	48	middle_aged	6	24	17	51	e3e3	9.2
B0477	SCD	M	63	yonger_aged	12	26	27	79	e2e3	9
B0478	NC	F	61	yonger_aged	9	30	25	71	e3e3	9.1
B0479	NC	F	62	yonger_aged	9	25	25	79	e2e3	9.1
B0480	MCI	F	50	middle_aged	6	19	16	42	e3e3	8.9
B0481	NC	F	65	yonger_aged	18	30	25	88	e3e3	8.7
B0482	AD	F	74	yonger_aged	18	20	13	42	e3e3	8.8
B0483	SCD	F	67	yonger_aged	9	27	24	78	e3e3	8.8
B0484	NC	M	58	middle_aged	12	30	26	90	e3e3	9.1
B0487	MCI	F	49	middle_aged	9	26	23	68	e3e4	8.7
B0488	NC	M	59	middle_aged	18	29	25	85	e3e3	9.6
B0489	NC	F	60	yonger_aged	10	29	26	92	e3e4	9
B0490	NC	M	65	yonger_aged	12	28	26	81	e3e4	8.8
B0491	NC	F	76	aged	10	25	22	73	e3e4	8.4
B0493	NC	F	78	aged	18	29	27	86	e3e3	8.6
B0496	MCI	M	66	yonger_aged	9	25	25	73	e3e4	8.6
B0497	NC	F	66	yonger_aged	9	28	28	85	e3e3	8.4
B0498	NC	F	59	middle_aged	10	29	27	79	e3e4	8.3
B0500	NC	F	67	yonger_aged	9	27	25	75	e3e3	8.2
B0501	SCD	F	70	yonger_aged	12	29	27	79	e3e3	7.5
B0506	SCD	F	65	yonger_aged	9	30	22	84	e3e3	8.8
B0507	SCD	F	74	yonger_aged	12	27	24	83	e3e3	8
B0509	MCI	F	59	middle_aged	12	28	19	64	e3e3	9
B0510	SCD	F	63	yonger_aged	18	30	29	84	e3e3	9
B0511	AD	F	70	yonger_aged	10	20	18	65	e3e4	9
B0512	AD	F	68	yonger_aged	6	18	10	49	e2e4	9
B0521	MCI	F	71	yonger_aged	9	27	23	77	e3e3	8.5
B0522	SCD	M	55	middle_aged	18	29	26	78	e3e3	9
B0523	NC	M	63	yonger_aged	18	28	27	91	e3e3	8.5
B0524	SCD	F	72	yonger_aged	12	28	25	81	e3e4	9.3
B0525	NC	F	69	yonger_aged	9	25	24	71	e3e4	9.1
B0529	SCD	F	62	yonger_aged	9	24	22	65	e3e3	8.9
B0531	NC	F	57	middle_aged	10	29	28	88	e3e3	8.8
B0532	MCI	M	56	middle_aged	10	28	25	83	e3e3	8.9
B0533	SCD	F	72	yonger_aged	12	27	20	76	e3e3	9.1
B0534	NC	M	71	yonger_aged	NA	30	25	86	e2e3	9.1
B0535	NC	F	69	yonger_aged	12	29	30	90	e2e3	9
B0537	SCD	M	68	yonger_aged	10	26	25	72	e3e3	8.8
B0540	MCI	F	66	yonger_aged	9	28	24	74	e3e4	8.8
B0541	MCI	F	69	yonger_aged	12	26	21	64	e3e3	8.8
B0542	SCD	F	63	yonger_aged	9	26	22	76	e3e3	9.4
B0546	MCI	M	57	middle_aged	10	26	26	77	e2e3	9.3
B0547	NC	F	73	yonger_aged	9	29	27	76	e3e3	8.8
B0548	NC	M	79	aged	18	28	26	89	e3e4	8.3
B0551	MCI	M	78	aged	18	29	18	82	e4e4	8.7
B0556	SCD	M	71	yonger_aged	18	29	26	87	e3e4	8.6
B0558	AD	F	77	aged	10	10	6	38	e3e3	8.6
B0559	SCD	F	66	yonger_aged	9	30	23	74	e3e3	9.2
B0560	SCD	M	75	aged	10	25	25	82	e3e4	9.1
B0565	SCD	M	67	yonger_aged	18	29	28	85	e3e3	8.6
B0569	NC	M	60	yonger_aged	9	28	27	84	e3e4	9.1
B0570	SCD	F	62	yonger_aged	12	28	25	74	e2e3	8.9
B0572	SCD	F	72	yonger_aged	10	29	29	82	e3e3	8.9
B0579	MCI	F	61	yonger_aged	10	26	18	65	e3e4	8.3
B0580	MCI	F	65	yonger_aged	9	29	22	67	e3e3	8.9
B0581	MCI	F	63	yonger_aged	12	25	21	65	e2e3	7.7
B0582	SCD	M	54	middle_aged	18	28	25	81	e3e3	8.3
B0586	MCI	F	72	yonger_aged	12	30	28	88	e3e3	8.2
B0634	SCD	F	55	middle_aged	18	28	28	90	e3e3	8.7
B0636	NC	F	75	aged	18	30	29	96	e3e4	8.1
B0637	NC	M	75	aged	18	30	28	97	e2e3	8.2
B0638	AD	M	80	aged	18	23	21	65	e3e3	8.2
B0642	SCD	M	42	youth	18	26	28	85	e2e3	8.5
B0649	SCD	M	55	middle_aged	18	29	28	90	e3e3	8.7
B0663	AD	F	80	aged	10	21	20	58	e3e3	8.3
B0664	AD	F	89	aged	6	22	10	50	e3e3	8.8
B0672	NC	M	66	yonger_aged	12	27	26	81	e3e3	8.9
B0691	NC	M	80	aged	18	28	29	85	e3e3	7.8
B0695	MCI	M	73	yonger_aged	10	29	20	81	e3e4	8.7
B0700	NC	F	71	yonger_aged	10	25	23	76	e3e3	8.4
B0703	NC	M	67	yonger_aged	9	28	27	81	e3e3	7.3
B0704	NC	F	67	yonger_aged	9	28	25	83	e3e3	7.8
B0714	SCD	F	66	yonger_aged	18	30	27	95	e3e4	8.7
B0719	MCI	F	75	aged	9	26	23	70	e2e3	8.1
B0726	SCD	F	67	yonger_aged	10	28	20	77	e3e3	7.8
B0728	MCI	F	63	yonger_aged	12	28	30	78	e3e3	8.4
B0733	MCI	F	72	yonger_aged	6	27	22	79	e3e4	7.9
B0747	SCD	F	76	aged	12	27	21	81	e3e3	8.2
B0748	NC	F	54	middle_aged	18	30	27	82	e3e4	8.2
B0770	AD	F	80	aged	10	10	4	86	e3e3	8.3
B0775	AD	F	82	aged	12	21	16	85	e3e3	8.7
B0781	AD	M	67	yonger_aged	6	18	12	50	e3e3	8.5
B0782	NC	F	56	middle_aged	9	26	27	74	e3e3	9.2
B0785	SCD	F	70	yonger_aged	9	28	22	73	e2e3	8.5
